# Supplementary material for: Amide-derived enols in enol–Ugi reactions: expanding horizons for peptidomimetic scaffold synthesis
Source: Royal Society of Chemistry journal article supplement (doi:10.1039/d4ob01216j), 2024-01-01

## SUPPLEMENTARY INFORMATION for

# Amide-Derived Enols in Enol-Ugi Reactions: Expanding Horizons for Peptidomimetic Scaffold Synthesis

José Luis Ramiro, Ana G. Neo,\* and Carlos F. Marcos\*

Laboratory of Bioorganic Chemistry & Membrane Biophysics (L.O.B.O.). Departamento de Química Orgánica e Inorgánica. Universidad de Extremadura (<https://ror.org/0174shg90>). 10003 Cáceres, Spain.

### Table of contents

|                                                                                                                            |   |
|----------------------------------------------------------------------------------------------------------------------------|---|
| Starting materials .....                                                                                                   | 5 |
| Synthesis and spectroscopic data of 2-(Hydroxy(phenylamino)methylene)-1 <i>H</i> -indene-1,3(2 <i>H</i> )-dione (10) ..... | 6 |
| Synthesis of imines (3a-l) and spectroscopic data.....                                                                     | 6 |
| ( <i>E</i> )- <i>N</i> -Benzyl-1-phenylmethanimine (3a) <sup>3</sup> .....                                                 | 6 |
| ( <i>E</i> )- <i>N</i> -benzyl-1-(furan-2-yl)methanimine (3b) <sup>4</sup> .....                                           | 6 |
| ( <i>E</i> )- <i>N</i> -(Benzo[ <i>d</i> ][1,3]dioxol-5-ylmethyl)-1-phenylmethanimine (3c) <sup>5</sup> .....              | 7 |
| Ethyl ( <i>E</i> )-3-((2-bromobenzylidene)amino)propanoate (3d).....                                                       | 7 |
| Ethyl ( <i>E</i> )-3-((4-methylbenzylidene)amino)propanoate (3e) .....                                                     | 7 |
| ( <i>E</i> )- <i>N</i> ,1-Diphenylmethanimine (3f) <sup>6</sup> .....                                                      | 7 |
| ( <i>E</i> )- <i>N</i> -Phenyl-1-( <i>p</i> -tolyl)methanimine (3g) <sup>7</sup> .....                                     | 8 |
| ( <i>E</i> )-1-(4-Methoxyphenyl)- <i>N</i> -phenylmethanimine (3h) <sup>8</sup> .....                                      | 8 |
| ( <i>E</i> )-1-(Benzo[ <i>d</i> ][1,3]dioxol-5-yl)- <i>N</i> -phenylmethanimine (3i) <sup>9-10</sup> .....                 | 8 |
| ( <i>E</i> )- <i>N</i> -Phenyl-1-(4-(trifluoromethyl)phenyl)methanimine (3j) <sup>11</sup> .....                           | 8 |
| ( <i>E</i> )- <i>N</i> -(4-Chlorophenyl)-1-phenylmethanimine (3k) <sup>12</sup> .....                                      | 8 |
| ( <i>E</i> )- <i>N</i> -(4-Methoxyphenyl)-1-phenylmethanimine (3l) <sup>13</sup> .....                                     | 9 |
| References .....                                                                                                           | 9 |

|                                                                                                                                                                            |    |
|----------------------------------------------------------------------------------------------------------------------------------------------------------------------------|----|
| Computational methods.....                                                                                                                                                 | 11 |
| Table S1. Fukui indices for enolate (12). .....                                                                                                                            | 11 |
| Figure S3. Natural Population Analysis (NPA) charges of primary adduct (15). .....                                                                                         | 12 |
| Figure S4. Representation of calculated HOMO for primary adduct (15). .....                                                                                                | 12 |
| Table S2. HOMO -1, HOMO and LUMO orbitals coefficients into the primary adduct (15).<br>.....                                                                              | 13 |
| Table S3. Fukui indices for primary adduct (15). .....                                                                                                                     | 29 |
| Table S4. Relative energies of the intermediates of the Michael-retro-Michael rearrangement<br>affording product (11), calculated at B3LYP/6-31+g(d) level of theory. .... | 30 |
| Matrices XYZ for computationally derived structures.....                                                                                                                   | 30 |
| Spectra.....                                                                                                                                                               | 31 |
| 2-(Hydroxy(phenylamino)methylene)-1 <i>H</i> -indene-1,3(2 <i>H</i> )-dione (10).....                                                                                      | 31 |
| ( <i>E</i> )- <i>N</i> -benzyl-1-phenylmethanimine (3a).....                                                                                                               | 32 |
| ( <i>E</i> )- <i>N</i> -benzyl-1-(furan-2-yl)methanimine (3b).....                                                                                                         | 32 |
| ( <i>E</i> )- <i>N</i> -(Benzo[ <i>d</i> ][1,3]dioxol-5-ylmethyl)-1-phenylmethanimine (3c) .....                                                                           | 33 |
| Ethyl ( <i>E</i> )-3-((2-bromobenzylidene)amino)propanoate (3d).....                                                                                                       | 34 |
| Ethyl ( <i>E</i> )-3-((4-methylbenzylidene)amino)propanoate (3e) .....                                                                                                     | 35 |
| ( <i>E</i> )- <i>N</i> ,1-Diphenylmethanimine (3f).....                                                                                                                    | 36 |
| ( <i>E</i> )- <i>N</i> -Phenyl-1-( <i>p</i> -tolyl)methanimine (3g).....                                                                                                   | 36 |
| ( <i>E</i> )-1-(4-Methoxyphenyl)- <i>N</i> -phenylmethanimine (3h) .....                                                                                                   | 37 |
| ( <i>E</i> )-1-(Benzo[ <i>d</i> ][1,3]dioxol-5-yl)- <i>N</i> -phenylmethanimine (3i) .....                                                                                 | 37 |
| ( <i>E</i> )- <i>N</i> -Phenyl-1-(4-(trifluoromethyl)phenyl)methanimine (3j) .....                                                                                         | 38 |
| ( <i>E</i> )- <i>N</i> -(4-Chlorophenyl)-1-phenylmethanimine (3k) .....                                                                                                    | 38 |
| ( <i>E</i> )- <i>N</i> -(4-Methoxyphenyl)-1-phenylmethanimine (3l) .....                                                                                                   | 39 |
| 3-(Benzyl(2-(cyclohexylamino)-2-oxo-1-phenylethyl)amino)-1-oxo- <i>N</i> -phenyl-1 <i>H</i> -indene-<br>2-carboxamide (11a) .....                                          | 40 |
| 3-(Benzyl(2-( <i>tert</i> -butylamino)-2-oxo-1-phenylethyl)amino)-1-oxo- <i>N</i> -phenyl-1 <i>H</i> -indene-2-<br>carboxamide (11b).....                                  | 41 |

|                                                                                                                                                                          |    |
|--------------------------------------------------------------------------------------------------------------------------------------------------------------------------|----|
| 3-(Benzyl(2-(cyclohexylamino)-1-(furan-2-yl)-2-oxoethyl)amino)-1-oxo- <i>N</i> -phenyl-1 <i>H</i> -indene-2-carboxamide (11c) .....                                      | 42 |
| 3-((Benzo[ <i>d</i> ][1,3]dioxol-5-ylmethyl)(2-( <i>tert</i> -butylamino)-2-oxo-1-phenylethyl)amino)-1-oxo- <i>N</i> -phenyl-1 <i>H</i> -indene-2-carboxamide (11d)..... | 43 |
| Ethyl 3-((1-(2-bromophenyl)-2-(cyclohexylamino)-2-oxoethyl)(1-oxo-2-(phenylcarbamoyl)-1 <i>H</i> -inden-3-yl)amino)propanoate (11e).....                                 | 44 |
| Ethyl 3-((1-(2-bromophenyl)-2-( <i>tert</i> -butylamino)-2-oxoethyl)(1-oxo-2-(phenylcarbamoyl)-1 <i>H</i> -inden-3-yl)amino)propanoate (11f).....                        | 45 |
| Ethyl 3-((2-(cyclohexylamino)-2-oxo-1-( <i>p</i> -tolyl)ethyl)(1-oxo-2-(phenylcarbamoyl)-1 <i>H</i> -inden-3-yl)amino)propanoate (11g) .....                             | 46 |
| 3-((2-(Cyclohexylamino)-2-oxo-1-phenylethyl)(phenyl)amino)-1-oxo- <i>N</i> -phenyl-1 <i>H</i> -indene-2-carboxamide (11h) .....                                          | 47 |
| 3-((2-( <i>tert</i> -Butylamino)-2-oxo-1-phenylethyl)(phenyl)amino)-1-oxo- <i>N</i> -phenyl-1 <i>H</i> -indene-2-carboxamide (11i) .....                                 | 48 |
| 3-((2-(Cyclohexylamino)-2-oxo-1-( <i>p</i> -tolyl)ethyl)(phenyl)amino)-1-oxo- <i>N</i> -phenyl-1 <i>H</i> -indene-2-carboxamide (11j) .....                              | 49 |
| 3-((2-( <i>tert</i> -Butylamino)-1-(4-methoxyphenyl)-2-oxoethyl)(phenyl)amino)-1-oxo- <i>N</i> -phenyl-1 <i>H</i> -indene-2-carboxamide (11k) .....                      | 50 |
| 3-((1-(Benzo[ <i>d</i> ][1,3]dioxol-5-yl)-2-( <i>tert</i> -butylamino)-2-oxoethyl)(phenyl)amino)-1-oxo- <i>N</i> -phenyl-1 <i>H</i> -indene-2-carboxamide (11l).....     | 51 |
| 3-(Benzyl(1-( <i>tert</i> -butylamino)-3-methyl-1-oxobutan-2-yl)amino)-1-oxo- <i>N</i> -phenyl-1 <i>H</i> -indene-2-carboxamide (11m) .....                              | 52 |
| 3-((2-((2,6-Dimethylphenyl)amino)-2-oxo-1-phenylethyl)(phenyl)amino)-1-oxo- <i>N</i> -phenyl-1 <i>H</i> -indene-2-carboxamide (11n) .....                                | 53 |
| 3-((4-Chlorophenyl)(2-(cyclohexylamino)-2-oxo-1-phenylethyl)amino)-1-oxo- <i>N</i> -phenyl-1 <i>H</i> -indene-2-carboxamide (11o).....                                   | 54 |
| 3-((2-(Cyclohexylamino)-2-oxo-1-phenylethyl)(4-methoxyphenyl)amino)-1-oxo- <i>N</i> -phenyl-1 <i>H</i> -indene-2-carboxamide (11p).....                                  | 55 |
| 1-Benzyl-3-cyclohexyl-3'-hydroxy-4-oxo- <i>N</i> ,5-diphenylspiro[imidazolidine-2,1'-indene]-2'-carboxamide (18a).....                                                   | 56 |
| Ethyl 3-(4-(2-bromophenyl)-1-cyclohexyl-3'-hydroxy-5-oxo-2'-(phenylcarbamoyl)spiro[imidazolidine-2,1'-inden]-3-yl)propanoate (18e) .....                                 | 57 |
| Compound 11o: COSY and COSY ampliation spectra.....                                                                                                                      | 58 |
| Compound 11o: HSQC and HSQC ampliation spectra.....                                                                                                                      | 59 |

|                                                       |    |
|-------------------------------------------------------|----|
| Compound 18a: ROESY and ROESY ampliation spectra..... | 60 |
|-------------------------------------------------------|----|

## Starting materials

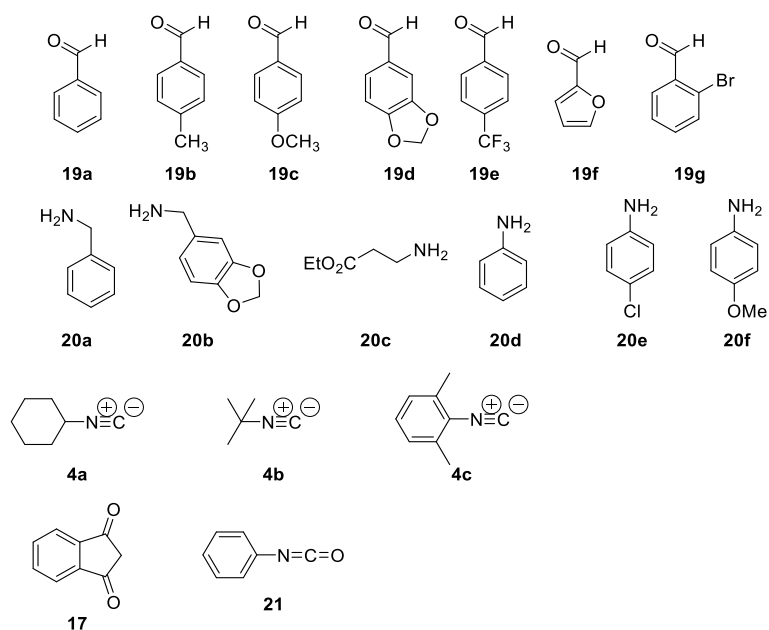

**Figure S1.** Aldehydes, amines, and isocyanide used as starting materials.

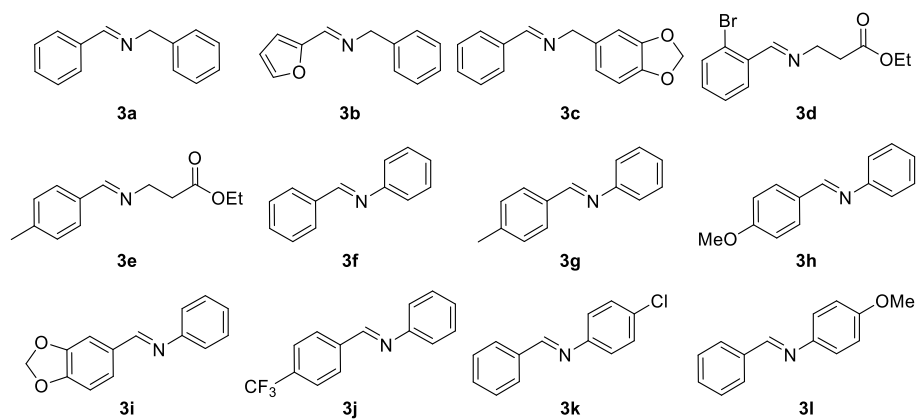

**Figure S2.** Imines used as starting materials.

## Synthesis and spectroscopic data of 2-(Hydroxy(phenylamino)methylene)-1*H*-indene-1,3(2*H*)-dione (**10**)

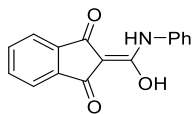

Enol (**10**) was synthesized following reported procedures.<sup>1</sup> A solution of 1,3-indandione (**17**, 13.7 mmol) in dry DMF (14 mL), cooled to -55°C, was stirred for 10 minutes. Phenyl isocyanate (**21**, 25 mmol) was then added, and the stirring was continued while gradually warming to room temperature overnight. The reaction mixture was quenched with ice-cold 2 N HCl (250 mL), and the resulting precipitate was filtered and washed with cold water. The solid was recrystallized from EtOH.

Obtained as a green solid; 95%; mp 142-144 °C (lit: 144-146 °C);<sup>2</sup> IR (cm<sup>-1</sup>) 3280, 3028, 1639, 1595, 1566, 1485, 1423, 1315, 1238, 1152, 941, 744, 681; <sup>1</sup>H NMR (500 MHz, CDCl<sub>3</sub>) δ 9.53 (s, 1H), 7.66 (d, *J* = 6.9 Hz, 1H), 7.63 (d, *J* = 5.98 Hz, 1H), 7.57 (dt, *J* = 6.2, 1.4 Hz, 2H), 7.53 (d, *J* = 7.8 Hz, 2H), 7.40 (t, *J* = 7.9 Hz, 2H), 7.21 (t, *J* = 7.4 Hz, 1H); <sup>13</sup>C NMR (126 MHz, CDCl<sub>3</sub>) δ 192.94 (C), 190.54 (C), 165.42 (C), 137.66 (C), 137.48 (C), 135.74 (C), 133.64 (CH), 133.24 (CH), 129.47 (CH), 125.80 (CH), 122.14 (CH), 121.65 (CH), 121.23 (CH), 96.14 (C).

## Synthesis of imines (**3a-l**) and spectroscopic data

To a solution of aldehyde (**19**, 1 mmol) in CH<sub>2</sub>Cl<sub>2</sub> (2 mL), anhydrous Na<sub>2</sub>SO<sub>4</sub> (1 mmol) and amine (**20**, 1 mmol) were successively added. After 24 hours stirring at room temperature, the reaction went to completion, as judged by tlc. Then the Na<sub>2</sub>SO<sub>4</sub> was filtered off, and the solvent was eliminated. In the case the amine was liberated from the corresponding hydrochloride, the crude was washed with 50 mL of H<sub>2</sub>O and 3x20 mL of AcOEt, and the combined organic phases were dried over Na<sub>2</sub>SO<sub>4</sub> and concentrated. The obtained imines **3a-l** were used without further purification in the enol-Ugi reactions.

### (*E*)-*N*-Benzyl-1-phenylmethanimine (**3a**)<sup>3</sup>

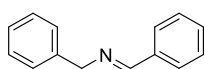

Obtained from benzaldehyde (**19a**, 1 mmol), and benzylamine (**20a**, 1 mmol) as a pale yellow oil; 99%; <sup>1</sup>H NMR (500 MHz, CDCl<sub>3</sub>) δ (ppm) 8.39 (s, 1H), 7.79 – 7.74 (m, 2H), 7.45 – 7.37 (m, 3H), 7.35 – 7.32 (m, 4H), 7.29 – 7.20 (m, 1H).

### (*E*)-*N*-benzyl-1-(furan-2-yl)methanimine (**3b**)<sup>4</sup>

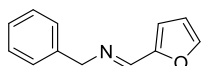

Obtained from furfural (**19f**, 1 mmol), and benzylamine (**20a**, 1 mmol) as a pale brown oil; 98%; <sup>1</sup>H NMR (500 MHz, CDCl<sub>3</sub>) δ (ppm) 8.15 (s, 1H), 7.50 (d, *J* = 1.7 Hz, 1H), 7.37 – 7.29 (m, 4H), 7.28 – 7.22 (m, 1H), 6.77 (d, *J* = 3.4 Hz, 1H), 6.46 (dd, *J* = 3.5, 1.8 Hz, 1H), 4.78 (d, *J* = 1.4 Hz, 2H).

**(E)-N-(Benzo[d][1,3]dioxol-5-ylmethyl)-1-phenylmethanimine (3c)**<sup>5</sup>

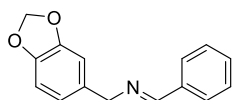

Obtained from benzaldehyde (**19a**, 1 mmol), and benzo[d][1,3]dioxol-5-ylmethanamine (**20b**, 1 mmol) as a white solid, mp 46-47 °C; 99%; <sup>1</sup>H NMR (500 MHz, CDCl<sub>3</sub>) δ (ppm) 8.36 (s, 1H), 7.80 – 7.70 (m, 2H), 7.50 – 7.32 (m, 3H), 6.86 – 6.71 (m, 3H), 5.93 (s, 2H), 4.73 (d, *J* = 1.4 Hz, 2H).

**Ethyl (E)-3-((2-bromobenzylidene)amino)propanoate (3d)**

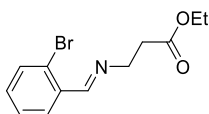

Obtained from 2-bromobenzaldehyde (**19g**, 1 mmol), and β-alanine ethyl ester hydrochloride (**20c**, 1 mmol) as a colourless liquid; 87%; <sup>1</sup>H NMR (500 MHz, CDCl<sub>3</sub>) δ (ppm) 8.70 (s, 1H), 7.97 (dd, *J* = 7.8, 1.8 Hz, 1H), 7.56 (dd, *J* = 8.0, 1.3 Hz, 1H), 7.32 (t, *J* = 7.0 Hz, 1H), 7.25 (td, *J* = 7.0, 1.9 Hz, 1H), 4.16 (q, *J* = 7.1 Hz, 2H), 3.94 (td, *J* = 6.9, 1.5 Hz, 2H), 2.74 (t, *J* = 6.9 Hz, 2H), 1.25 (t, *J* = 7.1 Hz, 3H); <sup>13</sup>C RNMR (126 MHz, CDCl<sub>3</sub>) δ (ppm) 172.07 (C), 161.49 (CH), 134.57 (C), 133.14 (CH), 132.00 (CH), 128.93 (CH), 127.72 (CH), 125.16 (C), 60.65 (CH<sub>2</sub>), 56.81 (CH<sub>2</sub>), 35.64 (CH<sub>2</sub>), 14.38 (CH<sub>3</sub>); HRMS (qTOF) Calcd for C<sub>12</sub>H<sub>15</sub><sup>81</sup>BrNO<sub>2</sub>: 286.0266. Found: 286.0244.

**Ethyl (E)-3-((4-methylbenzylidene)amino)propanoate (3e)**

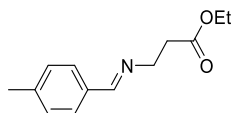

Obtained from 4-tolualdehyde (**19b**, 1 mmol), and β-alanine ethyl ester hydrochloride (**20c**, 1 mmol) as a colourless liquid; 89%; <sup>1</sup>H NMR (500 MHz, CDCl<sub>3</sub>) δ (ppm) 8.29 (s, 1H), 7.60 (d, *J* = 8.2 Hz, 2H), 7.20 (d, *J* = 7.9 Hz, 2H), 4.13 (q, *J* = 7.2 Hz, 2H), 3.87 (td, *J* = 6.9, 1.4 Hz, 2H), 2.72 (t, *J* = 6.9 Hz, 2H), 2.37 (s, 3H), 1.23 (t, *J* = 7.1 Hz, 3H); <sup>13</sup>C NMR (126 MHz, CDCl<sub>3</sub>) δ (ppm) 172.26 (C), 162.43 (CH), 141.16 (C), 133.51 (C), 129.43 (CH), 128.27 (CH), 60.52 (CH<sub>2</sub>), 56.80 (CH<sub>2</sub>), 35.67 (CH<sub>2</sub>), 21.61 (CH<sub>3</sub>), 14.35 (CH<sub>3</sub>); HRMS (qTOF) Calcd for C<sub>13</sub>H<sub>18</sub>NO<sub>2</sub>: 220.1338. Found: 220.1341.

**(E)-N,1-Diphenylmethanimine (3f)**<sup>6</sup>

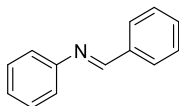

Obtained from benzaldehyde (**19a**, 1 mmol), and aniline (**20d**, 1 mmol) as a white solid, mp 49-50 °C (lit: 49-51 °C);<sup>6</sup> 97%; <sup>1</sup>H NMR (500 MHz, CDCl<sub>3</sub>) δ (ppm) 8.45 (s, 1H), 7.93 – 7.87 (m, 2H), 7.49 – 7.44 (m, 3H), 7.39 (t, *J* = 7.8 Hz, 2H), 7.25 – 7.19 (m, 3H).

**(E)-N-Phenyl-1-(p-tolyl)methanimine (3g)**<sup>7</sup>

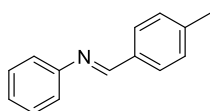

Obtained from *p*-methyl benzaldehyde (**19b**, 1 mmol), and aniline (**20d**, 1 mmol) as a white solid, mp 42-43 °C (lit: 41-42 °C);<sup>7</sup> 88%; <sup>1</sup>H NMR (500 MHz, CDCl<sub>3</sub>) δ (ppm) 8.41 (s, 1H), 7.79 (d, *J* = 8.1 Hz, 2H), 7.38 (t, *J* = 7.8 Hz, 2H), 7.27 (d, *J* = 7.9 Hz, 2H), 7.25 – 7.17 (m, 3H), 2.41 (s, 3H).

**(E)-1-(4-Methoxyphenyl)-N-phenylmethanimine (3h)**<sup>8</sup>

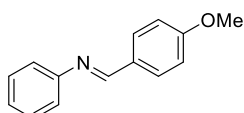

Obtained from *p*-methoxy benzaldehyde (**19c**, 1 mmol), and aniline (**20d**, 1 mmol) as a white solid, mp 51-53 °C (lit: 49.5-50.1°C); 96%; <sup>1</sup>H NMR (500 MHz, CDCl<sub>3</sub>) δ (ppm) 8.38 (s, 1H), 7.86 (d, *J* = 8.7 Hz, 2H), 7.38 (t, *J* = 8.7 Hz, 2H), 7.23 – 7.18 (m, 3H), 6.98 (d, *J* = 8.9 Hz, 2H), 3.87 (s, 3H).

**(E)-1-(Benzo[*d*][1,3]dioxol-5-yl)-N-phenylmethanimine (3i)**<sup>9-10</sup>

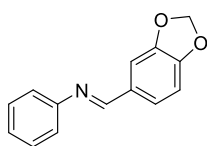

Obtained from benzo[*d*][1,3]dioxole-5-carbaldehyde (**19d**, 1 mmol), and aniline (**20d**, 1 mmol) as a white solid, mp 67-68 °C (lit: 68-70 °C);<sup>10</sup> 92%; <sup>1</sup>H NMR (500 MHz, CDCl<sub>3</sub>) δ (ppm) 8.32 (s, 1H), 7.53 (s, 1H), 7.39 – 7.35 (m, 2H), 7.26 (dd, *J* = 6.4, 1.6 Hz, 1H), 7.23 – 7.17 (m, 3H), 6.87 (d, *J* = 8.0 Hz, 1H), 6.03 (s, 2H).

**(E)-N-Phenyl-1-(4-(trifluoromethyl)phenyl)methanimine (3j)**<sup>11</sup>

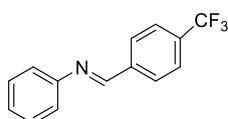

Obtained from *p*-trifluoro benzaldehyde (**19e**, 1 mmol), and aniline (**20d**, 1 mmol) as a white solid, mp 78-79 °C (lit: 79 °C);<sup>11</sup> 87%; <sup>1</sup>H NMR (500 MHz, CDCl<sub>3</sub>) δ (ppm) 8.50 (s, 1H), 8.02 (d, *J* = 8.0 Hz, 2H), 7.73 (d, *J* = 8.1 Hz, 2H), 7.41 (t, *J* = 7.8 Hz, 2H), 7.30 – 7.21 (m, 3H).

**(E)-N-(4-Chlorophenyl)-1-phenylmethanimine (3k)**<sup>12</sup>

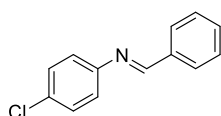



Obtained from benzaldehyde (**19a**, 1 mmol), and *p*-chloro aniline (**20e**, 1 mmol) as a pale grey solid, mp 60-61 °C (lit: 58-61 °C);<sup>12</sup> 97%; <sup>1</sup>H NMR (500 MHz, CDCl<sub>3</sub>) δ (ppm) 8.43 (s, 1H), 7.89 (dd, *J* = 7.6, 2.0 Hz, 2H), 7.53 – 7.44 (m, 3H), 7.35 (d, *J* = 8.7 Hz, 2H), 7.15 (d, *J* = 8.6 Hz, 2H).

**(E)-N-(4-Methoxyphenyl)-1-phenylmethanimine (31)**<sup>13</sup>

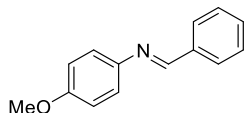

Obtained from benzaldehyde (**19a**, 1 mmol), and *p*-methoxy aniline (**20f**, 1 mmol) as a pale grey solid, mp 58-60 °C (lit: 58-60 °C);<sup>13</sup> 89%; <sup>1</sup>H NMR (500 MHz, CDCl<sub>3</sub>) δ (ppm) 8.48 (s, 1H), 7.90 – 7.87 (m, 2H), 7.48 – 7.44 (m, 3H), 7.27 – 7.21 (m, 2H), 6.97 – 6.90 (m, 2H), 3.83 (s, 3H).

## References

- 1 J. Song, M. Mishima and Z. Rappoport, *Org. Lett.*, 2007, **9**, 4307-4310. doi: <http://dx.doi.org/10.1021/ol7018554>
- 2 E. Malamidou-Xenikaki, S. Spyroudis and M. Tsanakopoulou, *J Org Chem*, 2003, **68**, 5627-5631. doi: <http://dx.doi.org/10.1021/jo0343679>
- 3 J. M. Huang, J. F. Zhang, Y. Dong and W. Gong, *J Org Chem*, 2011, **76**, 3511-3514. doi: <http://dx.doi.org/10.1021/jo102455q>
- 4 T. Regnier and O. Lavastre, *Tetrahedron*, 2006, **62**, 155-159. doi: <http://dx.doi.org/10.1016/j.tet.2005.09.127>
- 5 M. Bala, P. K. Verma, N. Kumar, U. Sharma and S. Bikram, *Canadian Journal of Chemistry*, 2013, **91**, 732-737. doi: <http://dx.doi.org/10.1139/cjc-2012-0399>
- 6 P. Nongkunsarn and C. A. Ramsden, *Tetrahedron*, 1997, **53**, 3805-3830. doi: [http://dx.doi.org/10.1016/S0040-4020\(97\)00101-4](http://dx.doi.org/10.1016/S0040-4020(97)00101-4)
- 7 A. Bolognese, M. V. Diurno, O. Mazzoni and F. Giordano, *Tetrahedron*, 1991, **47**, 7417-7428. doi: [http://dx.doi.org/10.1016/S0040-4020\(01\)89743-X](http://dx.doi.org/10.1016/S0040-4020(01)89743-X)
- 8 J. L. Garcia Ruano, J. Aleman, I. Alonso, A. Parra, V. Marcos and J. Aguirre, *Chemistry*, 2007, **13**, 6179-6195. doi: <http://dx.doi.org/10.1002/chem.200601893>
- 9 P. A. Suarez, C. K. Andrade, S. C. Takada, L. M. Alves, J. P. Rodrigues, R. F. Brandão and V. C. Soares, *Synlett*, 2004, 2135-2138. doi: <http://dx.doi.org/10.1055/s-2004-831328>
- 10 A. Echevarria, M. d. G. Nascimento, V. Gerônimo, J. Miller and A. Giesbrecht, *Journal of the Brazilian Chemical Society*, 1999, **10**, 60-64. doi: <http://dx.doi.org/10.1590/s0103-50531999000100010>
- 11 A. Hasegawa, Y. Naganawa, M. Fushimi, K. Ishihara and H. Yamamoto, *Org Lett*, 2006, **8**, 3175-3178. doi: <http://dx.doi.org/10.1021/ol060939a>

- 12 K. Tanaka and R. Shiraishi, *Green Chemistry*, 2000, **2**, 272-273. doi: <http://dx.doi.org/10.1039/b006424f>
- 13 E. Turos, C. Coates, J. Y. Shim, Y. Wang, J. M. Leslie, T. E. Long, G. S. Reddy, A. Ortiz, M. Culbreath, S. Dickey, D. V. Lim, E. Alonso and J. Gonzalez, *Bioorg Med Chem*, 2005, **13**, 6289-6308. doi: <http://dx.doi.org/10.1016/j.bmc.2005.08.011>

## Computational methods.

Table S1. Fukui indices for enolate (12).

| Atom | f-       | f+       |
|------|----------|----------|
| C 1  | 0,04358  | 0,08968  |
| C 2  | 0,03288  | 0,06957  |
| C 3  | 0,02928  | 0,01278  |
| C 4  | -0,01107 | 0,05782  |
| C 5  | -0,00017 | 0,05472  |
| C 6  | 0,02206  | 0,00494  |
| C 7  | 0,00454  | 0,06176  |
| C 8  | 0,20753  | 0,00222  |
| C 9  | -0,01726 | 0,04692  |
| C 10 | -0,04708 | 0,00795  |
| O 11 | 0,04761  | 0,03219  |
| N 12 | 0,11605  | 0,02583  |
| C 13 | -0,00923 | -0,08026 |
| C 14 | 0,05063  | 0,03512  |
| C 15 | 0,00858  | 0,05377  |
| C 16 | 0,09785  | 0,12305  |
| C 17 | 0,00475  | 0,01942  |
| C 18 | 0,05736  | 0,03832  |
| O 19 | 0,07839  | 0,07735  |
| H 20 | 0,02306  | 0,02702  |
| H 21 | 0,02275  | 0,02641  |
| H 22 | 0,01532  | 0,02109  |
| H 23 | 0,01727  | 0,02246  |
| H 24 | 0,0068   | -0,00177 |
| H 25 | 0,01476  | 0,00456  |
| H 26 | 0,02531  | 0,02385  |
| H 27 | 0,02563  | 0,03246  |
| H 28 | 0,02511  | 0,0172   |
| H 29 | 0,00981  | 0,00283  |
| O 30 | 0,09814  | 0,08844  |

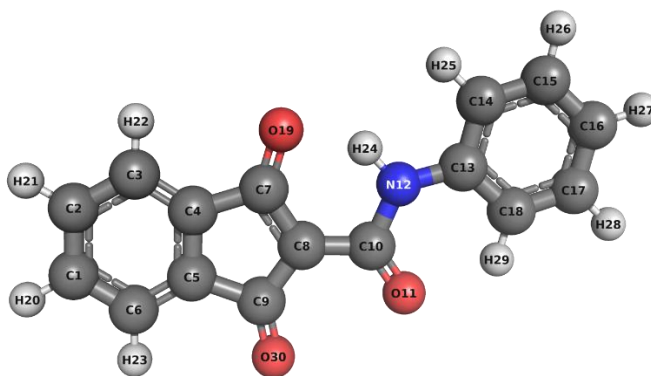



**Table S2. HOMO -1, HOMO and LUMO orbitals coefficients into the primary adduct (15).**

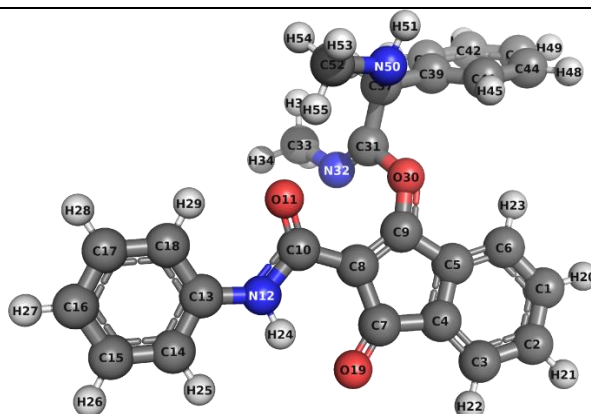

| ATOM | ATOMIC ORBITAL  | HOMO - 1 | HOMO     | LUMO     |
|------|-----------------|----------|----------|----------|
|      | Energies (a.u.) | -0.23550 | -0.21603 | -0.10877 |
| C1   | 1S              | -0.00015 | 0.00013  | 0.00008  |
|      | 2S              | 0.00027  | -0.00023 | 0.00016  |
|      | 2PX             | 0.00022  | -0.00378 | 0.01382  |
|      | 2PY             | -0.00164 | 0.00391  | -0.01016 |
|      | 2PZ             | 0.00031  | -0.04154 | 0.14575  |
|      | 3S              | 0.00333  | 0.00188  | -0.00371 |
|      | 3PX             | 0.00014  | -0.00252 | 0.01136  |
|      | 3PY             | -0.00054 | 0.00201  | -0.00595 |
|      | 3PZ             | -0.00032 | -0.02994 | 0.13948  |
|      | 4S              | -0.03214 | 0.02535  | -0.14157 |
|      | 4PX             | 0.01785  | -0.02965 | 0.00455  |
|      | 4PY             | -0.01953 | 0.01575  | 0.04543  |
|      | 4PZ             | -0.00187 | -0.00145 | 0.08146  |
|      | 5XX             | -0.00010 | 0.00034  | 0.00090  |
|      | 5YY             | -0.00006 | 0.00041  | 0.00115  |
|      | 5ZZ             | 0.00016  | -0.00063 | -0.00197 |
| 5XY  | 0.00009         | -0.00030 | -0.00118 |          |
| 5XZ  | -0.00025        | 0.00124  | 0.00462  |          |
| 5YZ  | 0.00086         | -0.00343 | -0.00943 |          |
| C2   | 1S              | -0.00018 | 0.00037  | 0.00018  |
|      | 2S              | 0.00041  | -0.00041 | -0.00033 |
|      | 2PX             | 0.00049  | -0.00539 | -0.01429 |
|      | 2PY             | -0.00068 | 0.00493  | 0.01126  |
|      | 2PZ             | 0.01312  | -0.06170 | -0.15089 |
|      | 3S              | 0.00009  | -0.00283 | -0.00069 |
|      | 3PX             | 0.00056  | -0.00388 | -0.01649 |
|      | 3PY             | 0.00094  | 0.00464  | 0.01074  |
|      | 3PZ             | 0.00925  | -0.04609 | -0.14175 |
|      | 4S              | 0.09918  | -0.19607 | -0.05236 |
| 4PX  | 0.00156         | 0.03041  | -0.00708 |          |
| 4PY  | -0.01222        | 0.01611  | 0.00240  |          |

|    |     |          |          |          |
|----|-----|----------|----------|----------|
|    | 4PZ | 0.00154  | -0.02838 | -0.08688 |
|    | 5XX | -0.00012 | -0.00025 | 0.00160  |
|    | 5YY | 0.00008  | -0.00003 | 0.00047  |
|    | 5ZZ | 0.00004  | 0.00045  | -0.00204 |
|    | 5XY | 0.00015  | 0.00015  | -0.00109 |
|    | 5XZ | -0.00026 | -0.00171 | 0.00919  |
|    | 5YZ | -0.00010 | 0.00071  | -0.00353 |
| C3 | 1S  | -0.00098 | 0.00015  | 0.00041  |
|    | 2S  | 0.00196  | -0.00048 | -0.00095 |
|    | 2PX | 0.00088  | 0.00043  | -0.00952 |
|    | 2PY | -0.00570 | 0.00078  | 0.00934  |
|    | 2PZ | 0.00797  | 0.01145  | -0.09354 |
|    | 3S  | 0.01076  | 0.00110  | -0.00249 |
|    | 3PX | 0.00165  | 0.00012  | -0.01331 |
|    | 3PY | -0.00706 | 0.00002  | 0.00826  |
|    | 3PZ | 0.00553  | 0.01213  | -0.08918 |
|    | 4S  | 0.29718  | -0.24648 | -0.25596 |
|    | 4PX | -0.02851 | 0.07070  | 0.02940  |
|    | 4PY | -0.06599 | 0.09347  | 0.07334  |
|    | 4PZ | -0.00202 | 0.01772  | -0.12128 |
|    | 5XX | -0.00001 | -0.00045 | -0.00157 |
|    | 5YY | -0.00016 | 0.00067  | 0.00152  |
|    | 5ZZ | -0.00010 | -0.00006 | 0.00012  |
|    | 5XY | 0.00042  | -0.00034 | -0.00054 |
|    | 5XZ | 0.00056  | -0.00261 | -0.00928 |
|    | 5YZ | 0.00038  | -0.00351 | -0.01059 |
| C4 | 1S  | 0.00123  | -0.00055 | -0.00096 |
|    | 2S  | -0.00237 | 0.00156  | 0.00161  |
|    | 2PX | -0.00719 | 0.00880  | 0.02030  |
|    | 2PY | 0.00756  | -0.00726 | -0.01773 |
|    | 2PZ | -0.00602 | 0.06065  | 0.17793  |
|    | 3S  | -0.01155 | -0.00563 | 0.01835  |
|    | 3PX | -0.01137 | 0.01146  | 0.03153  |
|    | 3PY | -0.00243 | -0.00361 | -0.02255 |
|    | 3PZ | -0.00559 | 0.03871  | 0.17433  |
|    | 4S  | -0.07621 | -0.05387 | -0.07880 |
|    | 4PX | 0.00867  | 0.01831  | -0.19586 |
|    | 4PY | -0.23128 | 0.28152  | 0.19974  |
|    | 4PZ | -0.02010 | -0.00059 | 0.38554  |
|    | 5XX | -0.00046 | 0.00041  | -0.00250 |
|    | 5YY | 0.00058  | -0.00039 | 0.00050  |
|    | 5ZZ | 0.00013  | -0.00032 | 0.00177  |
|    | 5XY | 0.00028  | -0.00008 | 0.00067  |
|    | 5XZ | -0.00006 | 0.00258  | -0.01474 |
|    | 5YZ | 0.00081  | 0.00050  | -0.00557 |
| C5 | 1S  | -0.00186 | 0.00198  | 0.00129  |
|    | 2S  | 0.00420  | -0.00358 | -0.00211 |

|    |     |          |          |          |
|----|-----|----------|----------|----------|
|    | 2PX | 0.00053  | 0.00681  | -0.01455 |
|    | 2PY | -0.01336 | 0.00502  | 0.01965  |
|    | 2PZ | -0.00995 | 0.05395  | -0.17342 |
|    | 3S  | 0.00405  | -0.02136 | -0.01552 |
|    | 3PX | -0.00177 | 0.00454  | 0.00201  |
|    | 3PY | 0.00136  | 0.00864  | 0.00849  |
|    | 3PZ | -0.00510 | 0.03771  | -0.16464 |
|    | 4S  | -0.03284 | -0.00211 | 0.11989  |
|    | 4PX | -0.06888 | 0.11400  | 0.10196  |
|    | 4PY | -0.10593 | 0.12386  | 0.38524  |
|    | 4PZ | 0.00777  | 0.09728  | -0.28131 |
|    | 5XX | 0.00026  | 0.00042  | 0.00001  |
|    | 5YY | -0.00030 | -0.00058 | -0.00164 |
|    | 5ZZ | -0.00022 | 0.00041  | 0.00177  |
|    | 5XY | 0.00087  | -0.00019 | 0.00091  |
|    | 5XZ | -0.00025 | 0.00198  | 0.00176  |
|    | 5YZ | -0.00129 | 0.00490  | 0.01840  |
| C6 | 1S  | -0.00066 | 0.00003  | 0.00025  |
|    | 2S  | 0.00176  | -0.00056 | -0.00095 |
|    | 2PX | -0.00321 | 0.00240  | 0.00956  |
|    | 2PY | 0.00083  | -0.00291 | -0.00652 |
|    | 2PZ | -0.01255 | 0.04149  | 0.09995  |
|    | 3S  | 0.00256  | 0.00241  | -0.00342 |
|    | 3PX | -0.00160 | 0.00137  | 0.01256  |
|    | 3PY | -0.00155 | -0.00600 | -0.00091 |
|    | 3PZ | -0.00831 | 0.03092  | 0.08834  |
|    | 4S  | 0.12862  | -0.27683 | -0.16502 |
|    | 4PX | -0.04124 | 0.09053  | 0.09837  |
|    | 4PY | -0.01290 | 0.03241  | 0.04540  |
|    | 4PZ | -0.00334 | -0.01787 | 0.12181  |
|    | 5XX | -0.00017 | -0.00034 | 0.00149  |
|    | 5YY | 0.00001  | 0.00027  | -0.00125 |
|    | 5ZZ | -0.00004 | 0.00010  | -0.00023 |
|    | 5XY | 0.00051  | -0.00017 | 0.00003  |
|    | 5XZ | 0.00047  | -0.00282 | 0.00892  |
|    | 5YZ | -0.00008 | -0.00191 | 0.01076  |
| C7 | 1S  | 0.00036  | -0.00083 | -0.00128 |
|    | 2S  | -0.00062 | 0.00252  | 0.00358  |
|    | 2PX | -0.00108 | -0.00295 | 0.03605  |
|    | 2PY | 0.00070  | -0.00092 | -0.02618 |
|    | 2PZ | -0.00385 | -0.02955 | 0.26954  |
|    | 3S  | -0.00615 | 0.00649  | 0.00939  |
|    | 3PX | -0.00300 | 0.01180  | 0.02563  |
|    | 3PY | -0.00356 | 0.00574  | -0.00972 |
|    | 3PZ | -0.00080 | -0.02231 | 0.21769  |
|    | 4S  | -0.06567 | 0.15436  | 0.28769  |
|    | 4PX | 0.01274  | 0.02937  | -0.10296 |

|     |     |          |          |          |
|-----|-----|----------|----------|----------|
|     | 4PY | 0.04208  | -0.00138 | -0.22644 |
|     | 4PZ | 0.00171  | -0.01163 | -0.13259 |
|     | 5XX | 0.00021  | 0.00033  | 0.00469  |
|     | 5YY | -0.00056 | -0.00138 | 0.00163  |
|     | 5ZZ | 0.00016  | 0.00122  | -0.00625 |
|     | 5XY | 0.00006  | 0.00078  | -0.00261 |
|     | 5XZ | -0.00116 | -0.00138 | 0.02285  |
|     | 5YZ | 0.00070  | 0.00523  | -0.00839 |
| C8  | 1S  | 0.00221  | -0.00095 | -0.00192 |
|     | 2S  | -0.00335 | -0.00019 | 0.00582  |
|     | 2PX | 0.00616  | -0.00322 | 0.01104  |
|     | 2PY | 0.00590  | 0.00914  | -0.01410 |
|     | 2PZ | -0.01361 | -0.10833 | 0.12656  |
|     | 3S  | -0.00786 | 0.02619  | -0.00414 |
|     | 3PX | 0.00570  | -0.01261 | -0.01199 |
|     | 3PY | 0.00479  | -0.01172 | -0.01011 |
|     | 3PZ | -0.01555 | -0.07338 | 0.12918  |
|     | 4S  | -0.30415 | 0.09190  | -0.19823 |
|     | 4PX | -0.10325 | 0.05776  | 0.34635  |
|     | 4PY | -0.00460 | 0.05714  | -0.23007 |
|     | 4PZ | 0.03186  | 0.00853  | 0.20308  |
|     | 5XX | 0.00108  | -0.00225 | -0.00369 |
|     | 5YY | 0.00025  | 0.00069  | -0.00040 |
|     | 5ZZ | -0.00066 | 0.00107  | 0.00382  |
|     | 5XY | 0.00068  | 0.00031  | 0.00206  |
|     | 5XZ | 0.00045  | -0.00736 | -0.01700 |
|     | 5YZ | 0.00031  | -0.00253 | 0.01046  |
| C9  | 1S  | 0.00163  | 0.00026  | -0.00103 |
|     | 2S  | 0.00177  | -0.00074 | 0.00127  |
|     | 2PX | -0.00958 | -0.00576 | -0.01730 |
|     | 2PY | 0.01455  | -0.00009 | 0.00757  |
|     | 2PZ | 0.02535  | -0.09064 | -0.32292 |
|     | 3S  | -0.03343 | 0.00341  | 0.02759  |
|     | 3PX | -0.00280 | 0.00377  | -0.03711 |
|     | 3PY | 0.02687  | 0.01418  | 0.01126  |
|     | 3PZ | 0.01497  | -0.06997 | -0.25117 |
|     | 4S  | -0.25007 | 0.00899  | 0.06507  |
|     | 4PX | -0.01170 | 0.10462  | 0.00115  |
|     | 4PY | -0.06906 | 0.37701  | 0.42941  |
|     | 4PZ | -0.03679 | -0.12162 | -0.11350 |
|     | 5XX | -0.00039 | 0.00319  | 0.00137  |
|     | 5YY | 0.00287  | -0.00139 | -0.00040 |
|     | 5ZZ | -0.00104 | -0.00143 | -0.00083 |
|     | 5XY | 0.00002  | -0.00174 | -0.00161 |
|     | 5XZ | 0.00272  | 0.00782  | -0.00749 |
|     | 5YZ | -0.00162 | -0.00142 | -0.01110 |
| C10 | 1S  | 0.00029  | 0.00182  | 0.00129  |



|     |     |          |          |          |
|-----|-----|----------|----------|----------|
|     | 2S  | 0.00009  | -0.00362 | -0.00282 |
|     | 2PX | 0.00130  | 0.01249  | 0.00553  |
|     | 2PY | 0.01089  | -0.02028 | -0.01603 |
|     | 2PZ | 0.00052  | 0.06351  | 0.05036  |
|     | 3S  | 0.00371  | -0.01758 | -0.01050 |
|     | 3PX | 0.00311  | -0.00698 | 0.02044  |
|     | 3PY | 0.00625  | -0.03282 | -0.03129 |
|     | 3PZ | -0.00203 | 0.03508  | 0.03001  |
|     | 4S  | 0.02039  | 0.03529  | 0.07636  |
|     | 4PX | 0.17273  | 0.22687  | -0.05574 |
|     | 4PY | 0.09699  | -0.00187 | -0.03989 |
|     | 4PZ | -0.02371 | 0.03408  | -0.05908 |
|     | 5XX | 0.00229  | -0.00506 | 0.00077  |
|     | 5YY | -0.00097 | -0.00527 | -0.00287 |
|     | 5ZZ | -0.00114 | 0.01110  | 0.00250  |
|     | 5XY | -0.00361 | 0.00769  | -0.00007 |
|     | 5XZ | -0.00162 | -0.01740 | 0.00422  |
|     | 5YZ | -0.00156 | 0.00997  | 0.00892  |
| O11 | 1S  | -0.00426 | 0.00124  | -0.00022 |
|     | 2S  | 0.01044  | -0.00267 | 0.00063  |
|     | 2PX | 0.05699  | -0.04565 | -0.00838 |
|     | 2PY | -0.00221 | 0.03423  | 0.02122  |
|     | 2PZ | 0.01536  | -0.15067 | -0.06470 |
|     | 3S  | 0.01994  | -0.00937 | -0.00382 |
|     | 3PX | 0.03638  | -0.02841 | -0.00637 |
|     | 3PY | 0.00086  | 0.02297  | 0.01241  |
|     | 3PZ | 0.01054  | -0.10779 | -0.05145 |
|     | 4S  | -0.02068 | -0.02826 | -0.06196 |
|     | 4PX | 0.00396  | -0.03175 | -0.00750 |
|     | 4PY | -0.02111 | 0.01015  | -0.00073 |
|     | 4PZ | -0.00059 | -0.05581 | -0.02685 |
|     | 5XX | -0.00154 | 0.00082  | 0.00015  |
|     | 5YY | 0.00037  | 0.00156  | -0.00011 |
|     | 5ZZ | 0.00020  | -0.00183 | -0.00040 |
|     | 5XY | 0.00255  | -0.00131 | -0.00024 |
|     | 5XZ | 0.00037  | 0.00073  | 0.00092  |
|     | 5YZ | 0.00012  | -0.00407 | -0.00085 |
| N12 | 1S  | -0.00234 | -0.00173 | 0.00020  |
|     | 2S  | 0.00586  | 0.00491  | -0.00176 |
|     | 2PX | 0.01146  | 0.04315  | -0.00795 |
|     | 2PY | -0.00657 | -0.06825 | 0.01254  |
|     | 2PZ | -0.01022 | 0.30522  | -0.05429 |
|     | 3S  | 0.01263  | 0.00042  | 0.00976  |
|     | 3PX | 0.00791  | 0.03825  | 0.00747  |
|     | 3PY | -0.00342 | -0.05177 | 0.01524  |
|     | 3PZ | -0.00776 | 0.25005  | -0.04638 |
|     | 4S  | 0.02521  | -0.01785 | 0.02422  |

|     |     |          |          |          |
|-----|-----|----------|----------|----------|
|     | 4PX | -0.00047 | 0.02677  | 0.00735  |
|     | 4PY | -0.01125 | 0.03232  | 0.02753  |
|     | 4PZ | 0.00099  | 0.06797  | -0.01342 |
|     | 5XX | 0.00001  | 0.00272  | 0.00070  |
|     | 5YY | -0.00062 | -0.00090 | -0.00048 |
|     | 5ZZ | -0.00000 | -0.00156 | -0.00077 |
|     | 5XY | 0.00058  | -0.00253 | -0.00058 |
|     | 5XZ | -0.00032 | 0.01113  | 0.00310  |
|     | 5YZ | -0.00053 | 0.00427  | 0.00054  |
| C13 | 1S  | -0.00019 | 0.00054  | -0.00028 |
|     | 2S  | 0.00097  | -0.00286 | 0.00041  |
|     | 2PX | -0.00024 | -0.03196 | 0.00117  |
|     | 2PY | -0.00005 | 0.05025  | 0.00112  |
|     | 2PZ | 0.00706  | -0.22666 | -0.00145 |
|     | 3S  | 0.00254  | 0.01117  | 0.00666  |
|     | 3PX | -0.00237 | -0.01459 | 0.00618  |
|     | 3PY | -0.00305 | 0.04023  | 0.00780  |
|     | 3PZ | 0.00442  | -0.16118 | -0.00316 |
|     | 4S  | -0.38452 | 0.33495  | -0.05932 |
|     | 4PX | 0.29059  | 0.28689  | 0.18915  |
|     | 4PY | -0.15048 | -0.22531 | -0.11909 |
|     | 4PZ | -0.07981 | -0.14490 | -0.04856 |
|     | 5XX | 0.00031  | 0.00397  | -0.00068 |
|     | 5YY | -0.00026 | -0.00426 | 0.00099  |
|     | 5ZZ | 0.00014  | 0.00028  | -0.00026 |
|     | 5XY | -0.00024 | -0.00275 | 0.00065  |
|     | 5XZ | -0.00056 | 0.01724  | -0.00342 |
|     | 5YZ | -0.00013 | 0.01019  | -0.00232 |
| C14 | 1S  | -0.00062 | -0.00017 | -0.00009 |
|     | 2S  | 0.00150  | -0.00002 | -0.00010 |
|     | 2PX | 0.00427  | -0.02343 | 0.00304  |
|     | 2PY | -0.00182 | 0.04368  | -0.00554 |
|     | 2PZ | 0.00723  | -0.19436 | 0.02695  |
|     | 3S  | 0.00144  | 0.00373  | 0.00150  |
|     | 3PX | 0.00255  | -0.01872 | 0.00291  |
|     | 3PY | 0.00093  | 0.02884  | -0.00639 |
|     | 3PZ | 0.00527  | -0.13568 | 0.02352  |
|     | 4S  | 0.61065  | 0.29420  | 0.59246  |
|     | 4PX | 0.15441  | 0.12977  | -0.00661 |
|     | 4PY | -0.07554 | -0.00626 | -0.08906 |
|     | 4PZ | -0.03106 | -0.05738 | -0.02401 |
|     | 5XX | 0.00003  | -0.00236 | -0.00012 |
|     | 5YY | -0.00003 | -0.00145 | 0.00014  |
|     | 5ZZ | -0.00009 | 0.00363  | -0.00013 |
|     | 5XY | -0.00021 | 0.00271  | -0.00002 |
|     | 5XZ | 0.00017  | -0.00954 | -0.00040 |
|     | 5YZ | -0.00013 | 0.00340  | -0.00044 |

|     |          |          |          |          |
|-----|----------|----------|----------|----------|
| C15 | 1S       | 0.00020  | 0.00010  | -0.00006 |
|     | 2S       | -0.00070 | -0.00050 | -0.00001 |
|     | 2PX      | -0.00173 | 0.01056  | 0.00019  |
|     | 2PY      | -0.00040 | -0.02056 | -0.00019 |
|     | 2PZ      | 0.00001  | 0.08990  | 0.00102  |
|     | 3S       | 0.00198  | -0.00166 | 0.00015  |
|     | 3PX      | 0.00066  | 0.00687  | 0.00073  |
|     | 3PY      | -0.00158 | -0.01471 | -0.00193 |
|     | 3PZ      | -0.00043 | 0.05840  | 0.00175  |
|     | 4S       | -0.13324 | 0.04797  | -0.38361 |
|     | 4PX      | -0.00352 | 0.04115  | -0.06048 |
|     | 4PY      | 0.06827  | 0.05390  | 0.00750  |
|     | 4PZ      | 0.01329  | 0.02645  | 0.02348  |
|     | 5XX      | 0.00012  | -0.00163 | 0.00021  |
|     | 5YY      | -0.00015 | 0.00537  | -0.00067 |
|     | 5ZZ      | 0.00011  | -0.00382 | 0.00044  |
|     | 5XY      | -0.00014 | -0.00001 | -0.00000 |
|     | 5XZ      | 0.00024  | -0.00790 | 0.00128  |
|     | 5YZ      | 0.00046  | -0.01327 | 0.00180  |
|     | C16      | 1S       | -0.00040 | 0.00016  |
| 2S  |          | 0.00103  | -0.00061 | 0.00035  |
| 2PX |          | 0.00140  | 0.03245  | -0.00345 |
| 2PY |          | 0.00106  | -0.06032 | 0.00666  |
| 2PZ |          | -0.00834 | 0.26406  | -0.02913 |
| 3S  |          | -0.00048 | -0.00099 | -0.00100 |
| 3PX |          | -0.00050 | 0.02353  | -0.00377 |
| 3PY |          | -0.00019 | -0.04194 | 0.00498  |
| 3PZ |          | -0.00554 | 0.18469  | -0.02556 |
| 4S  |          | 0.22574  | 0.00303  | 0.13352  |
| 4PX |          | 0.02089  | -0.01596 | 0.01910  |
| 4PY |          | 0.04444  | 0.03861  | 0.05797  |
| 4PZ |          | 0.00967  | 0.07871  | -0.01095 |
| 5XX |          | -0.00017 | 0.00064  | 0.00001  |
| 5YY |          | -0.00009 | -0.00059 | -0.00005 |
| 5ZZ |          | 0.00010  | -0.00012 | 0.00001  |
| 5XY | -0.00010 | -0.00049 | -0.00005 |          |
| 5XZ | -0.00022 | 0.00289  | 0.00020  |          |
| 5YZ | 0.00011  | 0.00136  | 0.00009  |          |
| C17 | 1S       | 0.00044  | -0.00018 | 0.00000  |
|     | 2S       | -0.00084 | 0.00034  | -0.00012 |
|     | 2PX      | -0.00403 | 0.01330  | -0.00003 |
|     | 2PY      | 0.00154  | -0.02250 | -0.00042 |
|     | 2PZ      | -0.00627 | 0.09829  | 0.00141  |
|     | 3S       | -0.00280 | -0.00069 | -0.00021 |
|     | 3PX      | -0.00349 | 0.00711  | 0.00035  |
|     | 3PY      | 0.00206  | -0.01443 | -0.00031 |
| 3PZ | -0.00407 | 0.06372  | 0.00282  |          |

|     |     |          |          |          |
|-----|-----|----------|----------|----------|
|     | 4S  | -0.28550 | -0.19279 | -0.55420 |
|     | 4PX | -0.04166 | -0.10312 | -0.13875 |
|     | 4PY | -0.04042 | -0.01463 | -0.05796 |
|     | 4PZ | -0.01299 | 0.04315  | 0.00036  |
|     | 5XX | 0.00031  | -0.00351 | 0.00058  |
|     | 5YY | -0.00012 | -0.00020 | -0.00013 |
|     | 5ZZ | -0.00006 | 0.00362  | -0.00046 |
|     | 5XY | -0.00032 | 0.00367  | -0.00054 |
|     | 5XZ | 0.00024  | -0.01527 | 0.00219  |
|     | 5YZ | -0.00011 | 0.00013  | 0.00018  |
| C18 | 1S  | -0.00061 | 0.00045  | -0.00031 |
|     | 2S  | 0.00223  | -0.00149 | 0.00008  |
|     | 2PX | 0.00638  | -0.02564 | 0.00429  |
|     | 2PY | -0.00391 | 0.04322  | -0.00680 |
|     | 2PZ | 0.00017  | -0.18618 | 0.02705  |
|     | 3S  | -0.00247 | 0.00160  | 0.00589  |
|     | 3PX | 0.00198  | -0.01897 | 0.00226  |
|     | 3PY | -0.00643 | 0.03013  | -0.00203 |
|     | 3PZ | -0.00034 | -0.12742 | 0.02313  |
|     | 4S  | 0.11488  | -0.26450 | 0.23052  |
|     | 4PX | -0.10869 | -0.16017 | -0.24143 |
|     | 4PY | -0.05727 | -0.19309 | -0.19757 |
|     | 4PZ | 0.01384  | -0.08503 | 0.01011  |
|     | 5XX | -0.00001 | -0.00025 | -0.00030 |
|     | 5YY | -0.00003 | 0.00419  | -0.00002 |
|     | 5ZZ | 0.00019  | -0.00391 | 0.00007  |
|     | 5XY | -0.00035 | -0.00093 | 0.00014  |
|     | 5XZ | 0.00021  | -0.00220 | -0.00061 |
|     | 5YZ | 0.00041  | -0.01034 | 0.00003  |
| O19 | 1S  | -0.00040 | -0.00085 | 0.00026  |
|     | 2S  | 0.00107  | 0.00085  | -0.00069 |
|     | 2PX | -0.00053 | -0.00199 | -0.03724 |
|     | 2PY | -0.00860 | -0.01138 | 0.02679  |
|     | 2PZ | 0.01324  | 0.01599  | -0.27982 |
|     | 3S  | 0.00128  | 0.01164  | -0.00291 |
|     | 3PX | 0.00013  | 0.00046  | -0.03126 |
|     | 3PY | -0.00550 | -0.00994 | 0.02063  |
|     | 3PZ | 0.00913  | 0.01336  | -0.22609 |
|     | 4S  | 0.00521  | -0.01370 | -0.01017 |
|     | 4PX | -0.00110 | 0.00067  | -0.01119 |
|     | 4PY | -0.00331 | 0.00472  | 0.00803  |
|     | 4PZ | 0.00148  | 0.01499  | -0.08267 |
|     | 5XX | -0.00008 | -0.00084 | -0.00024 |
|     | 5YY | 0.00016  | -0.00016 | -0.00008 |
|     | 5ZZ | -0.00013 | -0.00024 | 0.00025  |
|     | 5XY | -0.00026 | -0.00075 | 0.00027  |
|     | 5XZ | 0.00036  | -0.00048 | -0.00036 |

|     |     |          |          |          |
|-----|-----|----------|----------|----------|
|     | 5YZ | -0.00009 | -0.00054 | 0.00171  |
| H20 | 1S  | -0.00013 | 0.00048  | 0.00040  |
|     | 2S  | -0.00098 | 0.00023  | 0.00241  |
|     | 3PX | 0.00003  | -0.00009 | 0.00046  |
|     | 3PY | -0.00002 | 0.00013  | -0.00040 |
|     | 3PZ | 0.00002  | -0.00123 | 0.00491  |
| H21 | 1S  | 0.00055  | -0.00006 | -0.00022 |
|     | 2S  | -0.00118 | 0.00079  | 0.00076  |
|     | 3PX | 0.00004  | -0.00017 | -0.00047 |
|     | 3PY | -0.00002 | 0.00015  | 0.00039  |
|     | 3PZ | 0.00037  | -0.00178 | -0.00514 |
| H22 | 1S  | -0.00243 | 0.00142  | 0.00124  |
|     | 2S  | -0.00190 | 0.00050  | -0.00006 |
|     | 3PX | 0.00001  | 0.00007  | -0.00030 |
|     | 3PY | -0.00007 | 0.00005  | 0.00033  |
|     | 3PZ | 0.00023  | 0.00023  | -0.00306 |
| H23 | 1S  | -0.00175 | 0.00033  | 0.00081  |
|     | 2S  | -0.00379 | 0.00048  | 0.00318  |
|     | 3PX | -0.00001 | 0.00009  | 0.00023  |
|     | 3PY | 0.00007  | -0.00022 | -0.00033 |
|     | 3PZ | -0.00029 | 0.00112  | 0.00321  |
| H24 | 1S  | -0.00547 | -0.00071 | -0.00103 |
|     | 2S  | -0.00621 | -0.00013 | -0.00839 |
|     | 3PX | 0.00030  | 0.00114  | -0.00049 |
|     | 3PY | 0.00017  | -0.00169 | 0.00039  |
|     | 3PZ | -0.00024 | 0.00954  | -0.00294 |
| H25 | 1S  | 0.00029  | 0.00012  | -0.00005 |
|     | 2S  | -0.00310 | 0.00020  | -0.00067 |
|     | 3PX | 0.00001  | -0.00055 | 0.00002  |
|     | 3PY | -0.00008 | 0.00117  | -0.00018 |
|     | 3PZ | 0.00020  | -0.00500 | 0.00063  |
| H26 | 1S  | 0.00099  | 0.00040  | -0.00017 |
|     | 2S  | 0.00179  | 0.00054  | 0.00149  |
|     | 3PX | -0.00001 | 0.00034  | 0.00004  |
|     | 3PY | -0.00001 | -0.00060 | -0.00001 |
|     | 3PZ | -0.00001 | 0.00262  | 0.00000  |
| H27 | 1S  | -0.00112 | 0.00029  | -0.00012 |
|     | 2S  | -0.00319 | 0.00036  | -0.00085 |
|     | 3PX | -0.00002 | 0.00093  | -0.00012 |
|     | 3PY | 0.00002  | -0.00169 | 0.00023  |
|     | 3PZ | -0.00023 | 0.00745  | -0.00097 |
| H28 | 1S  | -0.00091 | 0.00028  | -0.00019 |
|     | 2S  | 0.00006  | 0.00066  | 0.00086  |
|     | 3PX | -0.00004 | 0.00039  | 0.00000  |
|     | 3PY | 0.00003  | -0.00063 | 0.00003  |
|     | 3PZ | -0.00017 | 0.00285  | 0.00002  |
| H29 | 1S  | 0.00375  | -0.00073 | -0.00003 |

|     |     |          |          |          |
|-----|-----|----------|----------|----------|
|     | 2S  | 0.00126  | 0.00170  | 0.00297  |
|     | 3PX | -0.00040 | -0.00049 | -0.00005 |
|     | 3PY | -0.00011 | 0.00128  | -0.00011 |
|     | 3PZ | 0.00018  | -0.00517 | 0.00051  |
| O30 | 1S  | -0.00551 | 0.00387  | 0.01194  |
|     | 2S  | 0.00731  | -0.00873 | -0.02437 |
|     | 2PX | -0.01673 | 0.02458  | 0.01886  |
|     | 2PY | -0.04161 | 0.02569  | 0.03688  |
|     | 2PZ | 0.06391  | 0.06390  | 0.14322  |
|     | 3S  | 0.06308  | -0.01926 | -0.07023 |
|     | 3PX | -0.01372 | 0.01929  | 0.02290  |
|     | 3PY | -0.04335 | 0.01430  | 0.03549  |
|     | 3PZ | 0.05067  | 0.05094  | 0.10766  |
|     | 4S  | 0.11607  | 0.03690  | -0.11289 |
|     | 4PX | -0.03642 | 0.00909  | 0.03016  |
|     | 4PY | -0.01949 | -0.01406 | 0.04648  |
|     | 4PZ | 0.02208  | 0.03708  | 0.01477  |
|     | 5XX | -0.00216 | -0.00099 | -0.00015 |
|     | 5YY | -0.00587 | 0.00055  | 0.00193  |
|     | 5ZZ | 0.00221  | 0.00178  | 0.00386  |
|     | 5XY | 0.00232  | -0.00062 | -0.00353 |
|     | 5XZ | -0.00379 | 0.00066  | 0.00484  |
|     | 5YZ | 0.00171  | -0.00168 | -0.01219 |
| C31 | 1S  | 0.01765  | -0.00183 | -0.01304 |
|     | 2S  | -0.03637 | 0.00778  | 0.02889  |
|     | 2PX | -0.06859 | -0.01835 | 0.02811  |
|     | 2PY | 0.05241  | 0.00938  | 0.07411  |
|     | 2PZ | 0.08402  | -0.02248 | -0.00408 |
|     | 3S  | -0.14282 | -0.01034 | 0.11117  |
|     | 3PX | -0.03678 | -0.01578 | 0.01054  |
|     | 3PY | -0.01666 | -0.00186 | 0.06500  |
|     | 3PZ | 0.05380  | 0.00200  | 0.01751  |
|     | 4S  | -0.21417 | 0.09888  | 0.26807  |
|     | 4PX | -0.09860 | -0.20676 | -0.16598 |
|     | 4PY | 0.07133  | 0.19974  | 0.41767  |
|     | 4PZ | 0.07232  | -0.01523 | -0.10104 |
|     | 5XX | -0.00606 | 0.00233  | 0.00242  |
|     | 5YY | 0.00511  | 0.00218  | 0.00461  |
|     | 5ZZ | 0.00090  | -0.00485 | -0.01070 |
|     | 5XY | 0.00435  | 0.00093  | 0.00293  |
|     | 5XZ | 0.00476  | -0.00226 | -0.00171 |
|     | 5YZ | -0.01105 | 0.00172  | 0.00040  |
| N32 | 1S  | 0.01930  | -0.00387 | 0.00373  |
|     | 2S  | -0.03784 | 0.01021  | -0.00592 |
|     | 2PX | 0.08493  | -0.05801 | -0.06716 |
|     | 2PY | -0.12079 | 0.00453  | -0.02677 |
|     | 2PZ | -0.04823 | -0.01661 | -0.02659 |

|     |     |          |          |          |
|-----|-----|----------|----------|----------|
|     | 3S  | -0.11012 | 0.01010  | -0.04014 |
|     | 3PX | 0.05924  | -0.04183 | -0.06410 |
|     | 3PY | -0.07363 | 0.00346  | -0.02219 |
|     | 3PZ | -0.03020 | -0.01066 | -0.01511 |
|     | 4S  | -0.07014 | -0.04813 | -0.08942 |
|     | 4PX | 0.01659  | 0.02398  | 0.01223  |
|     | 4PY | -0.02328 | -0.02722 | -0.10628 |
|     | 4PZ | -0.01416 | 0.01924  | 0.02670  |
|     | 5XX | 0.00141  | -0.00308 | -0.00111 |
|     | 5YY | 0.00333  | 0.00033  | 0.00126  |
|     | 5ZZ | 0.00129  | 0.00223  | 0.00138  |
|     | 5XY | -0.00312 | 0.00184  | 0.00251  |
|     | 5XZ | -0.00324 | 0.00010  | -0.00106 |
|     | 5YZ | 0.00052  | 0.00017  | -0.00116 |
| C33 | 1S  | -0.00281 | 0.00008  | -0.00323 |
|     | 2S  | 0.00672  | 0.00039  | 0.00934  |
|     | 2PX | -0.03258 | 0.00765  | 0.00827  |
|     | 2PY | 0.07227  | 0.00023  | 0.01708  |
|     | 2PZ | 0.00709  | 0.00343  | -0.00686 |
|     | 3S  | 0.01393  | -0.00056 | 0.00653  |
|     | 3PX | -0.00987 | -0.00099 | 0.00016  |
|     | 3PY | 0.03994  | 0.00271  | 0.01280  |
|     | 3PZ | -0.00510 | 0.00415  | -0.00430 |
|     | 4S  | -0.03858 | -0.01811 | -0.03375 |
|     | 4PX | -0.01563 | 0.00639  | 0.01870  |
|     | 4PY | 0.01139  | -0.00620 | -0.00316 |
|     | 4PZ | 0.02008  | 0.00565  | 0.01357  |
|     | 5XX | 0.00154  | -0.00139 | -0.00179 |
|     | 5YY | -0.00711 | 0.00042  | -0.00094 |
|     | 5ZZ | 0.00508  | 0.00127  | 0.00255  |
|     | 5XY | 0.00557  | -0.00244 | -0.00296 |
|     | 5XZ | -0.00210 | 0.00170  | 0.00233  |
|     | 5YZ | -0.00274 | -0.00002 | -0.00071 |
| H34 | 1S  | 0.02283  | -0.01242 | -0.01598 |
|     | 2S  | 0.03500  | -0.02411 | -0.03038 |
|     | 3PX | 0.00029  | -0.00012 | -0.00008 |
|     | 3PY | 0.00130  | 0.00012  | 0.00081  |
|     | 3PZ | 0.00066  | 0.00007  | -0.00037 |
| H35 | 1S  | -0.05368 | 0.00562  | 0.00106  |
|     | 2S  | -0.06419 | 0.01517  | 0.00518  |
|     | 3PX | 0.00137  | 0.00022  | 0.00043  |
|     | 3PY | -0.00064 | 0.00013  | 0.00037  |
|     | 3PZ | -0.00209 | 0.00009  | -0.00012 |
| H36 | 1S  | 0.01722  | 0.00728  | 0.01112  |
|     | 2S  | 0.02592  | 0.00744  | 0.01621  |
|     | 3PX | -0.00126 | 0.00015  | 0.00010  |
|     | 3PY | 0.00097  | -0.00023 | -0.00018 |

|     |     |          |          |          |
|-----|-----|----------|----------|----------|
|     | 3PZ | -0.00014 | -0.00002 | -0.00014 |
| C37 | 1S  | 0.01122  | -0.00122 | 0.00049  |
|     | 2S  | -0.03789 | 0.00193  | -0.00020 |
|     | 2PX | 0.04192  | -0.00428 | -0.00254 |
|     | 2PY | -0.09514 | 0.00427  | -0.00499 |
|     | 2PZ | 0.07290  | 0.00774  | -0.00161 |
|     | 3S  | 0.00605  | 0.01417  | -0.00002 |
|     | 3PX | 0.02527  | -0.00717 | -0.00933 |
|     | 3PY | -0.00038 | 0.01137  | 0.00071  |
|     | 3PZ | 0.01453  | -0.00085 | -0.00145 |
|     | 4S  | 0.50779  | -0.01063 | -0.49609 |
|     | 4PX | -0.02317 | -0.09641 | -0.27899 |
|     | 4PY | 0.01327  | -0.02016 | -0.12497 |
|     | 4PZ | 0.01997  | 0.00810  | 0.14941  |
|     | 5XX | -0.00551 | 0.00058  | -0.00273 |
|     | 5YY | 0.00220  | 0.00029  | 0.00208  |
|     | 5ZZ | 0.00481  | -0.00094 | 0.00102  |
|     | 5XY | 0.00433  | -0.00030 | 0.00013  |
|     | 5XZ | 0.00072  | 0.00010  | 0.00045  |
|     | 5YZ | -0.02695 | -0.00164 | 0.00004  |
| H38 | 1S  | 0.11625  | 0.00557  | 0.00989  |
|     | 2S  | 0.21138  | 0.02249  | 0.03065  |
|     | 3PX | 0.00108  | 0.00004  | 0.00025  |
|     | 3PY | 0.00180  | 0.00022  | -0.00005 |
|     | 3PZ | 0.00068  | 0.00012  | -0.00018 |
| C39 | 1S  | 0.00525  | -0.00025 | 0.00234  |
|     | 2S  | -0.00726 | -0.00029 | -0.00772 |
|     | 2PX | 0.00188  | -0.00058 | 0.01103  |
|     | 2PY | 0.04813  | -0.00111 | 0.00475  |
|     | 2PZ | 0.01757  | 0.00005  | 0.00461  |
|     | 3S  | -0.07570 | 0.00360  | -0.00317 |
|     | 3PX | 0.01153  | -0.00523 | -0.00858 |
|     | 3PY | 0.00402  | -0.00356 | 0.01089  |
|     | 3PZ | 0.04095  | 0.00247  | -0.00231 |
|     | 4S  | -0.06948 | 0.10768  | 114.488  |
|     | 4PX | -0.00220 | -0.01560 | -0.12059 |
|     | 4PY | -0.12525 | -0.03029 | 0.01931  |
|     | 4PZ | 0.20884  | 0.04424  | -0.11550 |
|     | 5XX | -0.00104 | 0.00005  | 0.00021  |
|     | 5YY | 0.00230  | -0.00018 | -0.00004 |
|     | 5ZZ | -0.00044 | -0.00027 | -0.00046 |
|     | 5XY | 0.00507  | -0.00005 | -0.00058 |
|     | 5XZ | -0.00046 | 0.00000  | -0.00057 |
|     | 5YZ | -0.00051 | -0.00011 | -0.00006 |
| C40 | 1S  | 0.00461  | 0.00001  | -0.00016 |
|     | 2S  | -0.01076 | 0.00011  | -0.00009 |
|     | 2PX | 0.00958  | 0.00063  | 0.00167  |



|     |     |          |          |          |
|-----|-----|----------|----------|----------|
|     | 2PY | 0.02297  | 0.00027  | -0.00411 |
|     | 2PZ | 0.01956  | -0.00057 | -0.00650 |
|     | 3S  | -0.03811 | -0.00360 | 0.00585  |
|     | 3PX | -0.01068 | -0.00250 | 0.00223  |
|     | 3PY | 0.01202  | 0.00063  | -0.00131 |
|     | 3PZ | 0.01086  | -0.00168 | -0.01228 |
|     | 4S  | -0.09273 | -0.23756 | -0.26364 |
|     | 4PX | 0.18473  | -0.11524 | -0.03669 |
|     | 4PY | -0.00384 | -0.00623 | -0.02892 |
|     | 4PZ | 0.12892  | -0.02687 | 0.02715  |
|     | 5XX | 0.00160  | -0.00015 | -0.00028 |
|     | 5YY | 0.00095  | -0.00000 | 0.00021  |
|     | 5ZZ | -0.00225 | 0.00007  | 0.00018  |
|     | 5XY | -0.00055 | 0.00010  | -0.00002 |
|     | 5XZ | -0.00073 | 0.00011  | -0.00024 |
|     | 5YZ | -0.00112 | 0.00001  | -0.00032 |
| C41 | 1S  | 0.00285  | 0.00033  | -0.00062 |
|     | 2S  | -0.00780 | -0.00105 | 0.00110  |
|     | 2PX | 0.00382  | 0.00214  | 0.00013  |
|     | 2PY | 0.00542  | -0.00212 | -0.00599 |
|     | 2PZ | 0.06434  | -0.00092 | -0.00554 |
|     | 3S  | -0.00759 | 0.00296  | 0.00531  |
|     | 3PX | -0.05710 | 0.00041  | 0.01166  |
|     | 3PY | -0.02667 | -0.00314 | -0.00280 |
|     | 3PZ | 0.04580  | 0.00195  | -0.00435 |
|     | 4S  | 0.30738  | 0.10066  | -0.28310 |
|     | 4PX | -0.07643 | -0.03258 | 0.08648  |
|     | 4PY | -0.06562 | -0.01319 | 0.09555  |
|     | 4PZ | 0.08360  | 0.01283  | -0.07479 |
|     | 5XX | 0.00133  | 0.00021  | -0.00032 |
|     | 5YY | -0.00227 | -0.00002 | -0.00013 |
|     | 5ZZ | 0.00045  | -0.00006 | 0.00045  |
|     | 5XY | 0.00116  | 0.00002  | -0.00051 |
|     | 5XZ | -0.00085 | -0.00002 | 0.00011  |
|     | 5YZ | 0.00077  | 0.00004  | -0.00017 |
| C42 | 1S  | -0.00179 | -0.00006 | 0.00031  |
|     | 2S  | 0.00227  | 0.00009  | -0.00097 |
|     | 2PX | -0.00072 | -0.00131 | 0.00164  |
|     | 2PY | -0.02230 | 0.00169  | 0.00042  |
|     | 2PZ | -0.01704 | 0.00138  | 0.00014  |
|     | 3S  | 0.02848  | 0.00204  | -0.00307 |
|     | 3PX | -0.00552 | -0.00219 | 0.00034  |
|     | 3PY | -0.01262 | 0.00014  | -0.00120 |
|     | 3PZ | -0.01827 | 0.00088  | 0.00228  |
|     | 4S  | -0.15340 | 0.18850  | 0.19534  |
|     | 4PX | 0.12342  | -0.07081 | -0.03586 |
|     | 4PY | 0.06702  | -0.04563 | -0.00205 |

|     |     |          |          |          |
|-----|-----|----------|----------|----------|
|     | 4PZ | -0.03605 | -0.00261 | -0.02532 |
|     | 5XX | 0.00143  | 0.00007  | -0.00027 |
|     | 5YY | -0.00222 | 0.00006  | 0.00036  |
|     | 5ZZ | 0.00009  | -0.00003 | -0.00007 |
|     | 5XY | -0.00057 | 0.00006  | 0.00014  |
|     | 5XZ | -0.00118 | 0.00010  | 0.00048  |
|     | 5YZ | 0.00006  | 0.00000  | 0.00006  |
| H43 | 1S  | -0.00463 | -0.00038 | 0.00064  |
|     | 2S  | -0.00005 | 0.00197  | 0.00936  |
|     | 3PX | -0.00079 | -0.00002 | -0.00003 |
|     | 3PY | -0.00015 | -0.00003 | -0.00021 |
|     | 3PZ | 0.00049  | -0.00003 | -0.00019 |
| C44 | 1S  | -0.00235 | -0.00012 | 0.00058  |
|     | 2S  | 0.00204  | 0.00062  | -0.00148 |
|     | 2PX | -0.00994 | -0.00032 | 0.00354  |
|     | 2PY | -0.00301 | -0.00146 | -0.00099 |
|     | 2PZ | -0.01504 | -0.00123 | -0.00111 |
|     | 3S  | 0.05277  | -0.00129 | -0.00854 |
|     | 3PX | -0.02935 | 0.00062  | 0.00814  |
|     | 3PY | -0.00738 | -0.00033 | -0.00019 |
|     | 3PZ | -0.01297 | -0.00127 | 0.00140  |
|     | 4S  | -0.11323 | 0.07043  | 0.02170  |
|     | 4PX | -0.04348 | 0.01786  | 0.04294  |
|     | 4PY | 0.01313  | -0.01175 | -0.02402 |
|     | 4PZ | -0.06901 | 0.00716  | 0.04794  |
|     | 5XX | 0.00193  | -0.00009 | -0.00037 |
|     | 5YY | 0.00038  | 0.00004  | -0.00001 |
|     | 5ZZ | -0.00273 | 0.00009  | 0.00037  |
|     | 5XY | -0.00008 | 0.00010  | 0.00038  |
|     | 5XZ | -0.00237 | 0.00003  | 0.00008  |
|     | 5YZ | -0.00141 | 0.00009  | 0.00025  |
| H45 | 1S  | -0.02322 | -0.00078 | 0.00229  |
|     | 2S  | -0.00501 | 0.00051  | 0.00089  |
|     | 3PX | -0.00299 | -0.00006 | 0.00014  |
|     | 3PY | -0.00032 | -0.00016 | -0.00042 |
|     | 3PZ | -0.00121 | -0.00012 | -0.00021 |
| C46 | 1S  | 0.00351  | 0.00014  | 0.00008  |
|     | 2S  | -0.00771 | -0.00018 | -0.00082 |
|     | 2PX | 0.02643  | -0.00021 | -0.00249 |
|     | 2PY | -0.03713 | 0.00128  | 0.00590  |
|     | 2PZ | -0.01439 | 0.00109  | 0.00382  |
|     | 3S  | -0.01815 | -0.00032 | 0.00185  |
|     | 3PX | 0.02442  | 0.00044  | -0.00428 |
|     | 3PY | -0.01978 | 0.00083  | 0.00400  |
|     | 3PZ | -0.01511 | 0.00090  | 0.00495  |
|     | 4S  | -0.00296 | -0.00525 | -0.14069 |
|     | 4PX | -0.00487 | 0.00605  | 0.01599  |

|     |     |          |          |          |
|-----|-----|----------|----------|----------|
|     | 4PY | 0.05008  | -0.01334 | -0.00508 |
|     | 4PZ | -0.07965 | 0.03856  | 0.02488  |
|     | 5XX | 0.00084  | 0.00009  | -0.00021 |
|     | 5YY | 0.00067  | -0.00011 | -0.00006 |
|     | 5ZZ | -0.00072 | 0.00012  | 0.00005  |
|     | 5XY | 0.00069  | 0.00003  | 0.00006  |
|     | 5XZ | 0.00055  | -0.00001 | -0.00005 |
|     | 5YZ | 0.00038  | 0.00007  | 0.00001  |
| H47 | 1S  | -0.00313 | -0.00001 | 0.00084  |
|     | 2S  | -0.00150 | -0.00034 | 0.00021  |
|     | 3PX | 0.00019  | -0.00000 | 0.00008  |
|     | 3PY | -0.00057 | 0.00006  | 0.00001  |
|     | 3PZ | -0.00043 | 0.00005  | 0.00000  |
| H48 | 1S  | 0.00779  | -0.00012 | 0.00057  |
|     | 2S  | 0.01230  | 0.00020  | 0.00068  |
|     | 3PX | 0.00025  | -0.00001 | 0.00004  |
|     | 3PY | -0.00023 | -0.00004 | -0.00009 |
|     | 3PZ | 0.00002  | -0.00003 | -0.00004 |
| H49 | 1S  | 0.00722  | 0.00025  | -0.00047 |
|     | 2S  | 0.00741  | 0.00042  | 0.00062  |
|     | 3PX | 0.00048  | -0.00000 | -0.00010 |
|     | 3PY | -0.00109 | 0.00004  | 0.00021  |
|     | 3PZ | -0.00048 | 0.00003  | 0.00010  |
| N50 | 1S  | -0.05392 | -0.00267 | -0.00522 |
|     | 2S  | 0.11558  | 0.00656  | 0.01300  |
|     | 2PX | -0.00690 | -0.00211 | -0.00149 |
|     | 2PY | 0.46376  | 0.02759  | 0.02488  |
|     | 2PZ | -0.17343 | -0.01671 | -0.00184 |
|     | 3S  | 0.24935  | 0.00758  | 0.02941  |
|     | 3PX | 0.00563  | 0.00017  | 0.00274  |
|     | 3PY | 0.34410  | 0.01683  | 0.01285  |
|     | 3PZ | -0.12660 | -0.01468 | -0.00614 |
|     | 4S  | -0.16872 | 0.04829  | 0.13312  |
|     | 4PX | 0.04259  | 0.01345  | 0.04557  |
|     | 4PY | 0.14141  | 0.00999  | 0.00322  |
|     | 4PZ | -0.13733 | 0.00164  | -0.00352 |
|     | 5XX | 0.00111  | 0.00029  | 0.00022  |
|     | 5YY | -0.01512 | -0.00083 | -0.00167 |
|     | 5ZZ | 0.00046  | 0.00035  | 0.00080  |
|     | 5XY | 0.00416  | 0.00048  | 0.00085  |
|     | 5XZ | 0.00050  | -0.00022 | 0.00041  |
|     | 5YZ | 0.00775  | 0.00083  | -0.00041 |
| H51 | 1S  | -0.07040 | -0.00330 | -0.00731 |
|     | 2S  | -0.05547 | -0.00617 | -0.02830 |
|     | 3PX | 0.00291  | 0.00017  | 0.00029  |
|     | 3PY | 0.01242  | 0.00078  | 0.00084  |
|     | 3PZ | -0.00788 | -0.00072 | -0.00026 |

|     |     |          |          |          |
|-----|-----|----------|----------|----------|
| C52 | 1S  | 0.01307  | 0.00164  | 0.00056  |
|     | 2S  | -0.03652 | -0.00407 | -0.00145 |
|     | 2PX | -0.02312 | 0.00410  | -0.00315 |
|     | 2PY | -0.12487 | -0.01047 | -0.00178 |
|     | 2PZ | 0.02339  | 0.00128  | -0.00014 |
|     | 3S  | -0.00344 | -0.00273 | 0.00056  |
|     | 3PX | 0.01052  | -0.00055 | -0.00791 |
|     | 3PY | -0.03383 | -0.00236 | 0.00458  |
|     | 3PZ | 0.02088  | -0.00043 | 0.00085  |
|     | 4S  | 0.01506  | -0.03729 | -0.02003 |
|     | 4PX | -0.00685 | 0.00068  | -0.00140 |
|     | 4PY | -0.04486 | -0.01158 | -0.00508 |
|     | 4PZ | 0.03114  | -0.01125 | -0.00890 |
|     | 5XX | -0.01286 | -0.00060 | -0.00047 |
|     | 5YY | 0.01982  | 0.00138  | 0.00082  |
|     | 5ZZ | -0.00563 | -0.00041 | -0.00029 |
| H53 | 5XY | 0.01486  | 0.00090  | 0.00084  |
|     | 5XZ | -0.00739 | -0.00060 | -0.00009 |
|     | 5YZ | -0.00714 | -0.00047 | -0.00026 |
|     | 1S  | -0.03897 | -0.00350 | -0.00142 |
|     | 2S  | -0.03384 | -0.00269 | 0.00077  |
| H54 | 3PX | 0.00041  | 0.00020  | -0.00003 |
|     | 3PY | -0.00246 | -0.00024 | -0.00003 |
|     | 3PZ | -0.00054 | -0.00013 | 0.00003  |
|     | 1S  | 0.12521  | 0.00873  | 0.00414  |
| H55 | 2S  | 0.20527  | 0.01585  | 0.01408  |
|     | 3PX | -0.00089 | 0.00014  | -0.00003 |
|     | 3PY | 0.00076  | 0.00001  | -0.00000 |
|     | 3PZ | -0.00098 | -0.00008 | -0.00002 |
| H55 | 1S  | -0.06724 | -0.00491 | -0.00138 |
|     | 2S  | -0.07057 | -0.01408 | -0.01196 |
|     | 3PX | -0.00187 | -0.00078 | -0.00051 |
|     | 3PY | -0.00054 | 0.00044  | -0.00001 |
|     | 3PZ | 0.00188  | 0.00007  | -0.00022 |

**Table S3. Fukui indices for primary adduct (15).**

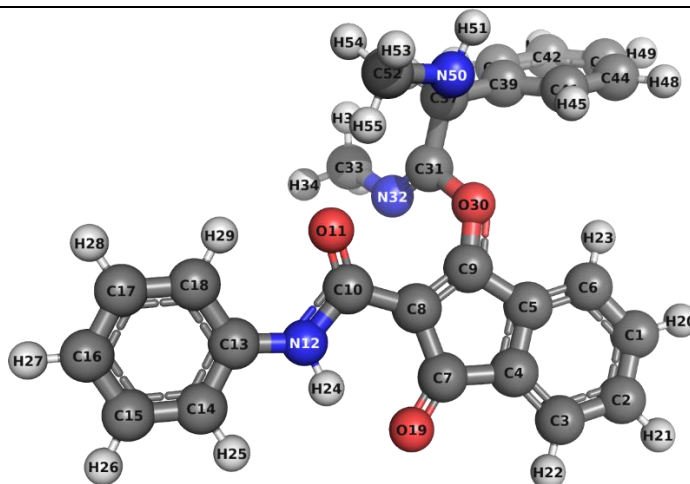

| Atom | f-       | f+       | Atom | f-3      | f+4      |
|------|----------|----------|------|----------|----------|
| C 1  | 0,02012  | 0,05906  | H 29 | 0,01492  | -0,00195 |
| C 2  | 0,03899  | 0,06518  | O 30 | 0,02046  | 0,02426  |
| C 3  | 0,01099  | 0,02853  | C 31 | -0,00526 | -0,02294 |
| C 4  | 0,01043  | 0,01574  | N 32 | 0,01049  | 0,02903  |
| C 5  | -0,00261 | 0,01923  | C 33 | -0,00484 | -0,00573 |
| C 6  | 0,02187  | 0,03193  | H 34 | 0,001    | 0,01119  |
| C 7  | -0,00436 | 0,11929  | H 35 | 0,00881  | 0,01626  |
| C 8  | 0,03047  | 0,00231  | H 36 | 0,01548  | 0,01481  |
| C 9  | 0,03258  | 0,15038  | C 37 | -0,00711 | -0,00526 |
| C 10 | -0,01215 | 0,00441  | H 38 | 0,01908  | 0,01269  |
| O 11 | 0,04142  | 0,04572  | C 39 | -0,01787 | -0,02344 |
| N 12 | 0,10627  | 0,01624  | C 40 | 0,00251  | 0,00996  |
| C 13 | 0,03904  | -0,01923 | C 41 | -0,00666 | -0,00474 |
| C 14 | 0,05336  | 0,00903  | C 42 | 0,00938  | 0,00971  |
| C 15 | 0,00939  | 0,00987  | H 43 | 0,00229  | 0,00363  |
| C 16 | 0,11815  | 0,03199  | C 44 | 0,00566  | 0,00192  |
| C 17 | 0,00896  | 0,00851  | H 45 | -0,00577 | -0,00654 |
| C 18 | 0,05307  | 0,01145  | C 46 | 0,01492  | 0,01313  |
| O 19 | 0,01367  | 0,12553  | H 47 | 0,01033  | 0,01076  |
| H 20 | 0,0163   | 0,02895  | H 48 | 0,00783  | 0,00534  |
| H 21 | 0,01697  | 0,02944  | H 49 | 0,01095  | 0,01057  |
| H 22 | 0,01261  | 0,02319  | N 50 | 0,08501  | -0,00416 |
| H 23 | 0,00974  | 0,02575  | H 51 | 0,01837  | 0,01355  |
| H 24 | 0,01507  | -0,00577 | C 52 | -0,00872 | -0,00168 |
| H 25 | 0,02239  | -0,00127 | H 53 | 0,01587  | 0,01164  |
| H 26 | 0,02813  | 0,01268  | H 54 | 0,02531  | 0,01186  |
| H 27 | 0,02617  | 0,01468  | H 55 | -0,0062  | -0,01353 |
| H 28 | 0,02671  | 0,01224  |      |          |          |

**Table S4. Relative energies of the intermediates of the Michael-retro-Michael rearrangement affording product (11), calculated at B3LYP/6-31+g(d) level of theory.**

|                          | Primary adduct (15) | Spirane-SR (16a) | Spirane-SS (16b) | Product (11) |
|--------------------------|---------------------|------------------|------------------|--------------|
| $\Delta G$<br>(kcal/mol) | 0.0                 | 0.48             | -2.81            | -22.82       |

**Matrices XYZ for computationally derived structures.**

The xyz matrices for the computationally derived structures of primary adduct (**15**), spirane-SR (**16a**) spirane-SS and indandione derivative (**11**) can be founded in the zip folder.

# Spectra

## 2-(Hydroxy(phenylamino)methylene)-1*H*-indene-1,3(2*H*)-dione (10)

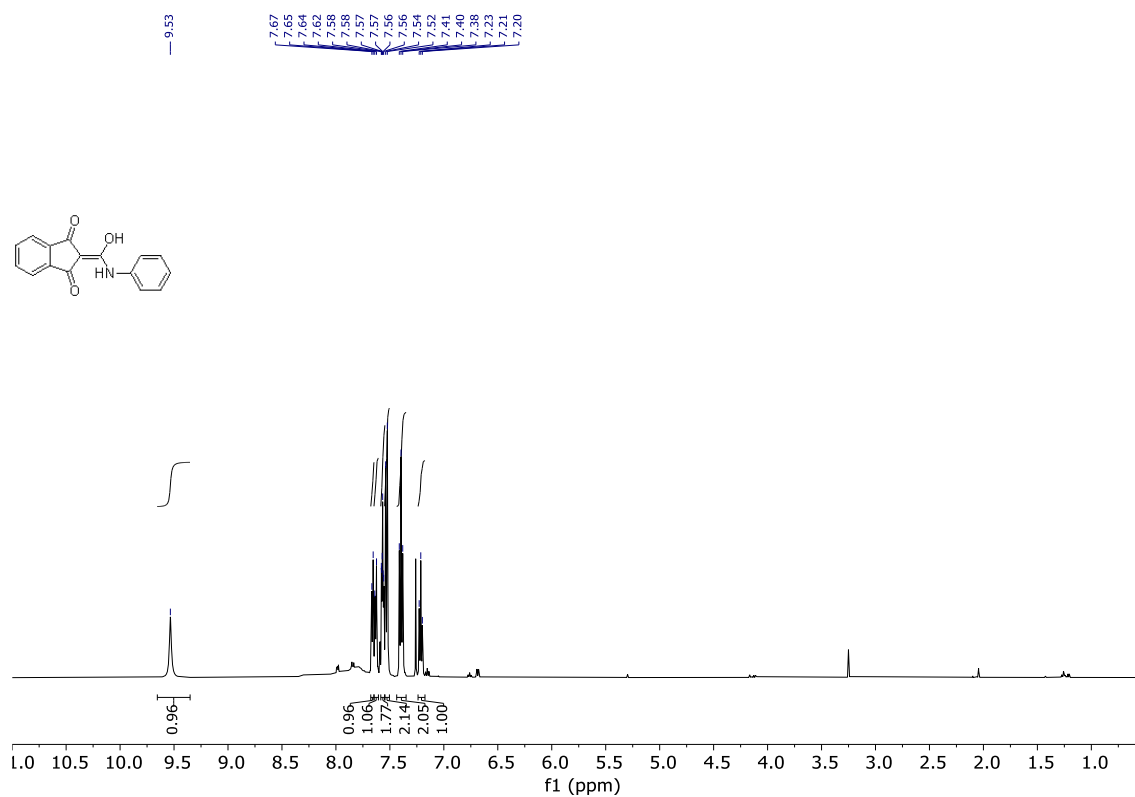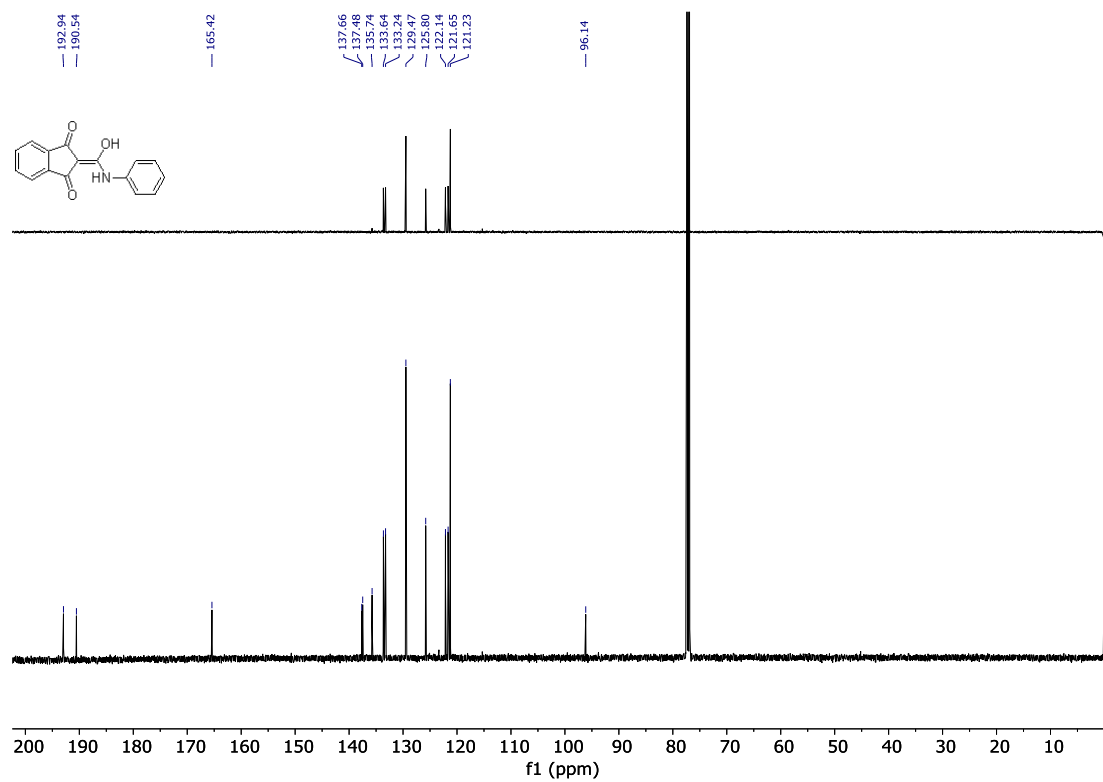





**(E)-N-(Benzo[d][1,3]dioxol-5-ylmethyl)-1-phenylmethanimine (3c)**

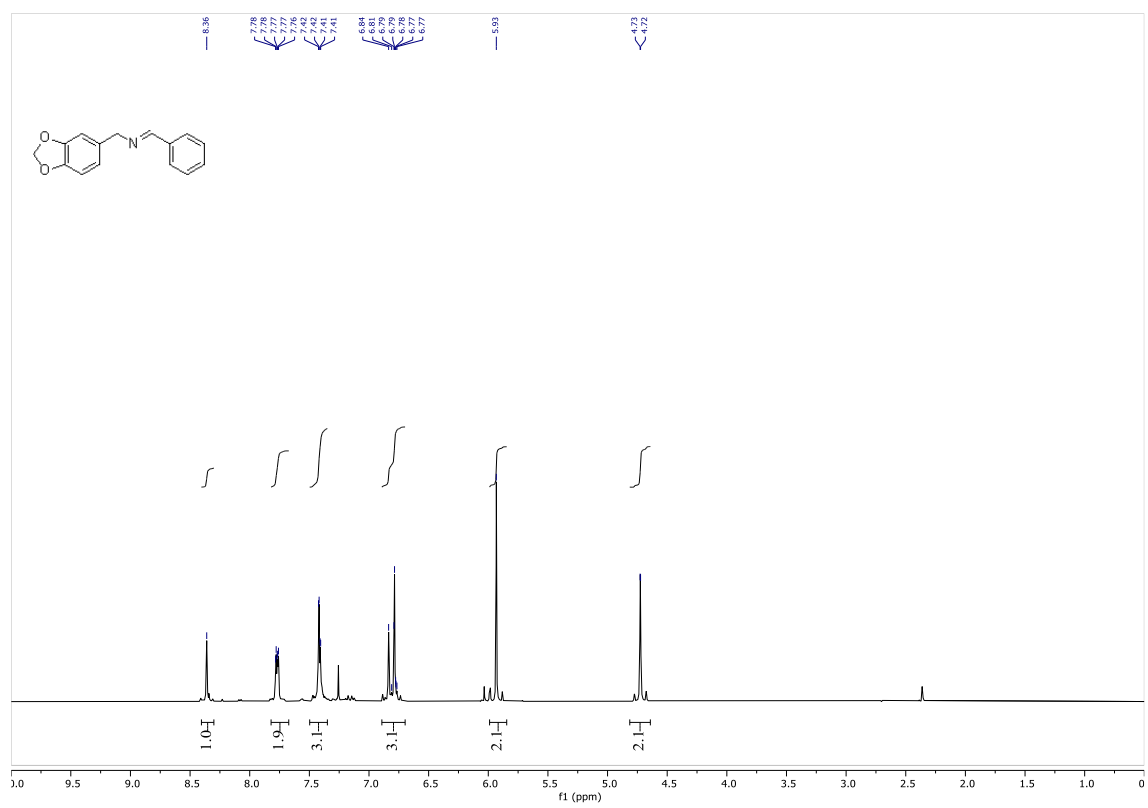

# Ethyl (*E*)-3-((2-bromobenzylidene)amino)propanoate (3d)

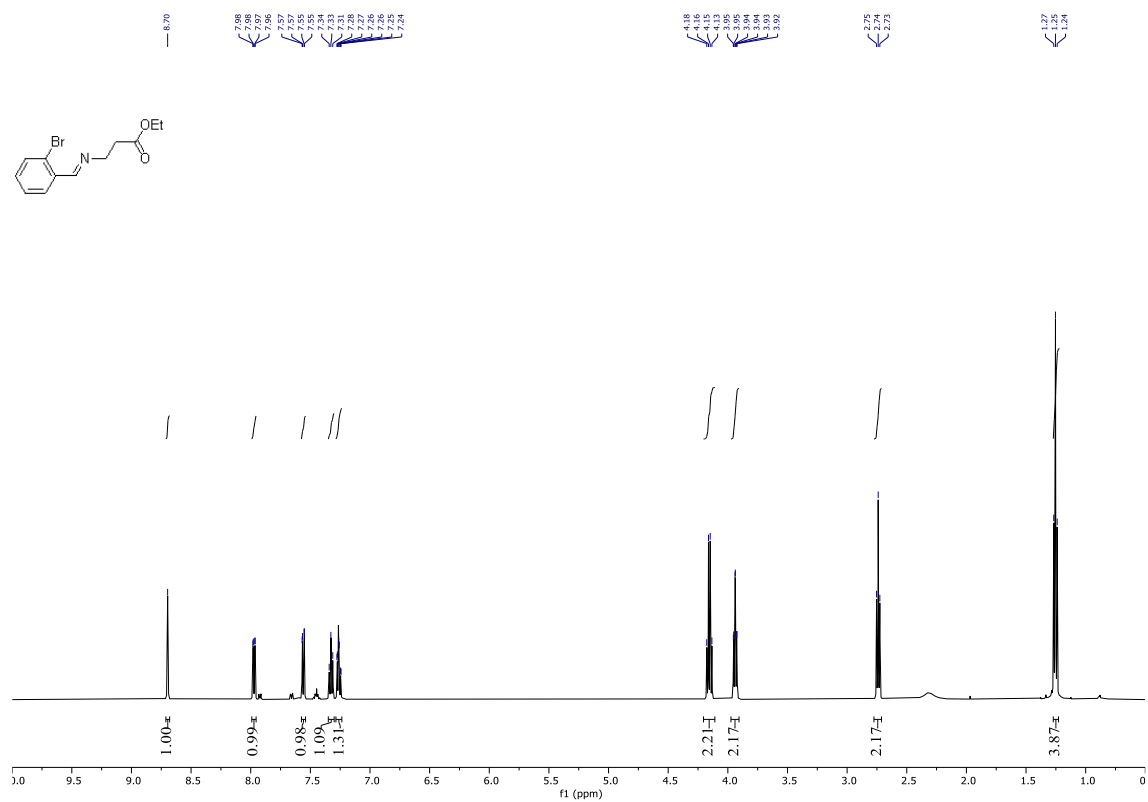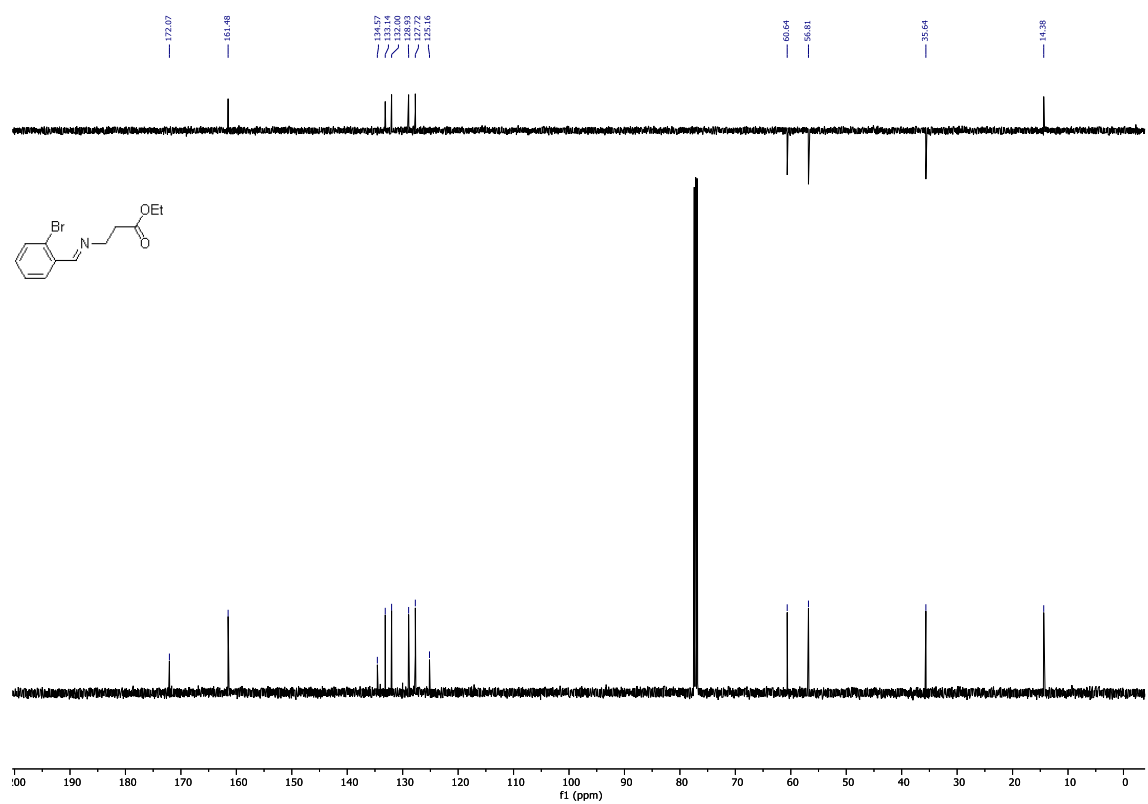

# Ethyl (*E*)-3-((4-methylbenzylidene)amino)propanoate (3e)

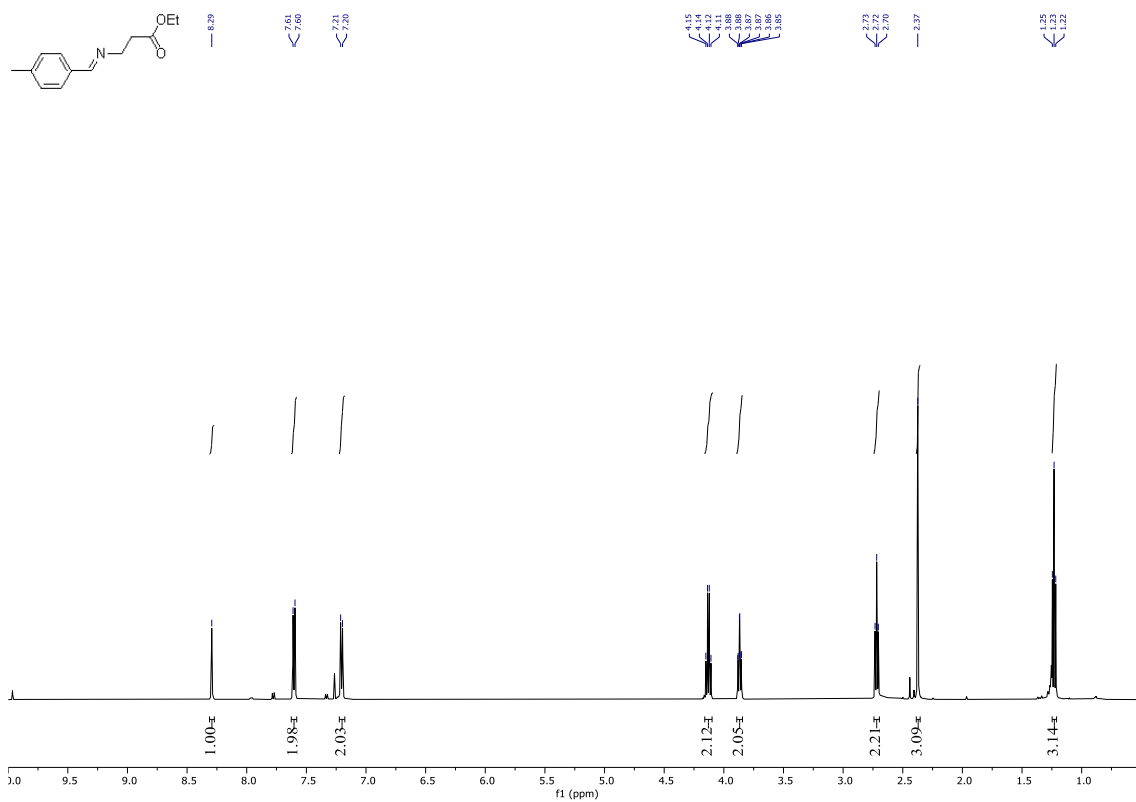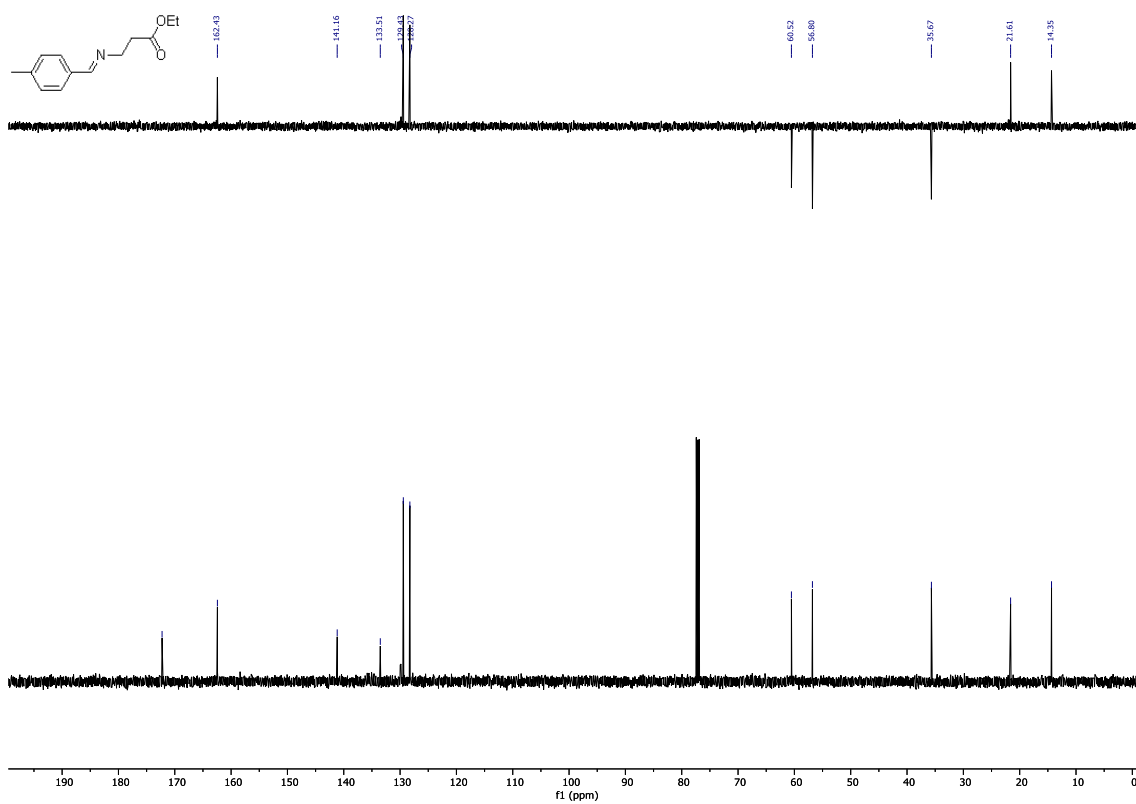



**(E)-1-(4-Methoxyphenyl)-N-phenylmethanimine (3h)**

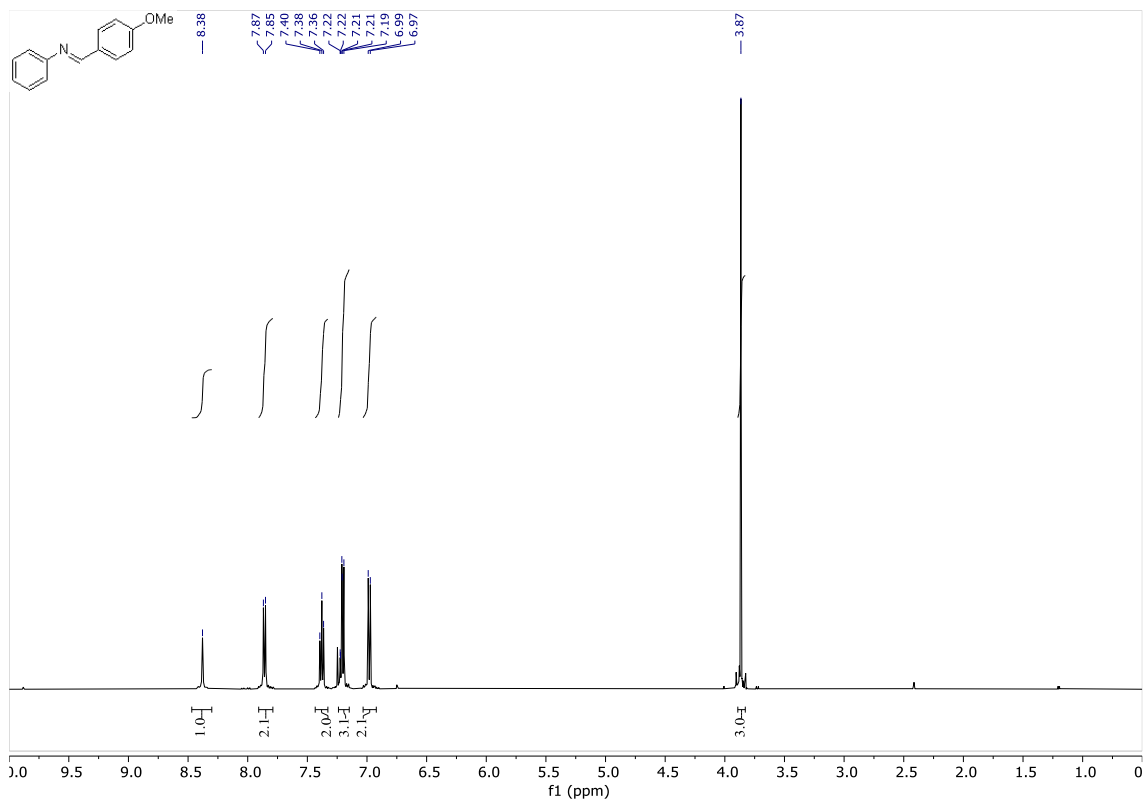

**(E)-1-(Benzo[d][1,3]dioxol-5-yl)-N-phenylmethanimine (3i)**

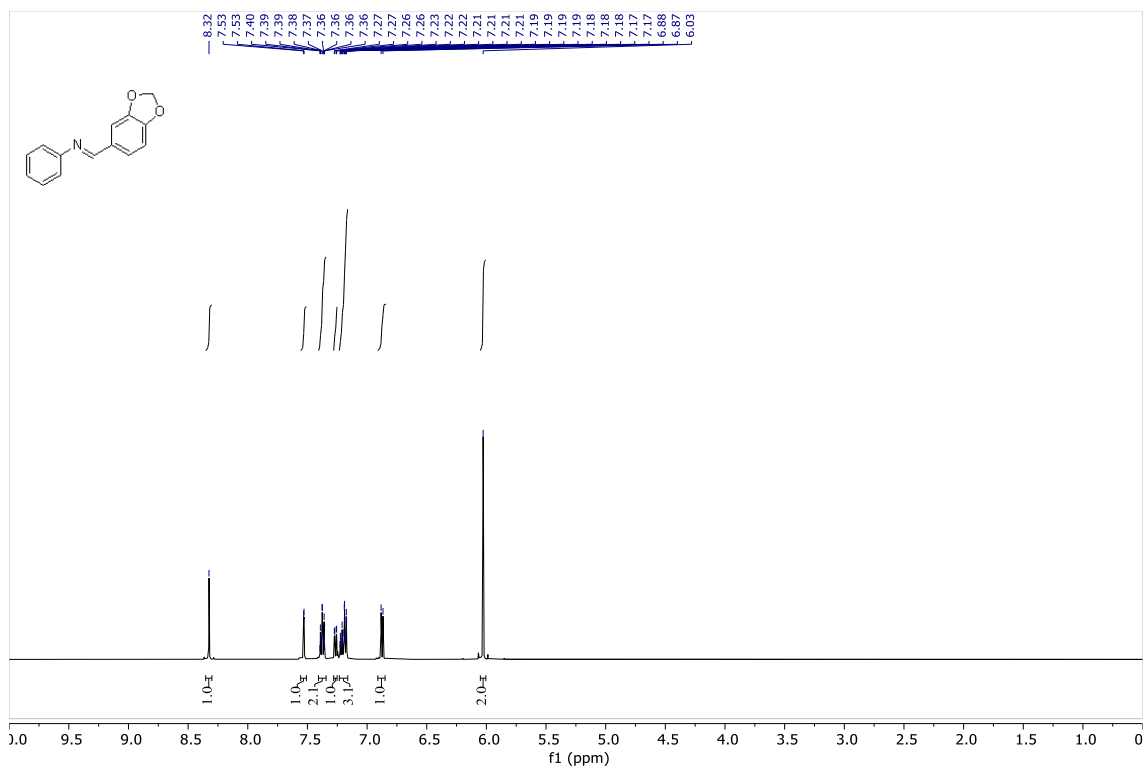

**(E)-N-Phenyl-1-(4-(trifluoromethyl)phenyl)methanimine (3j)**

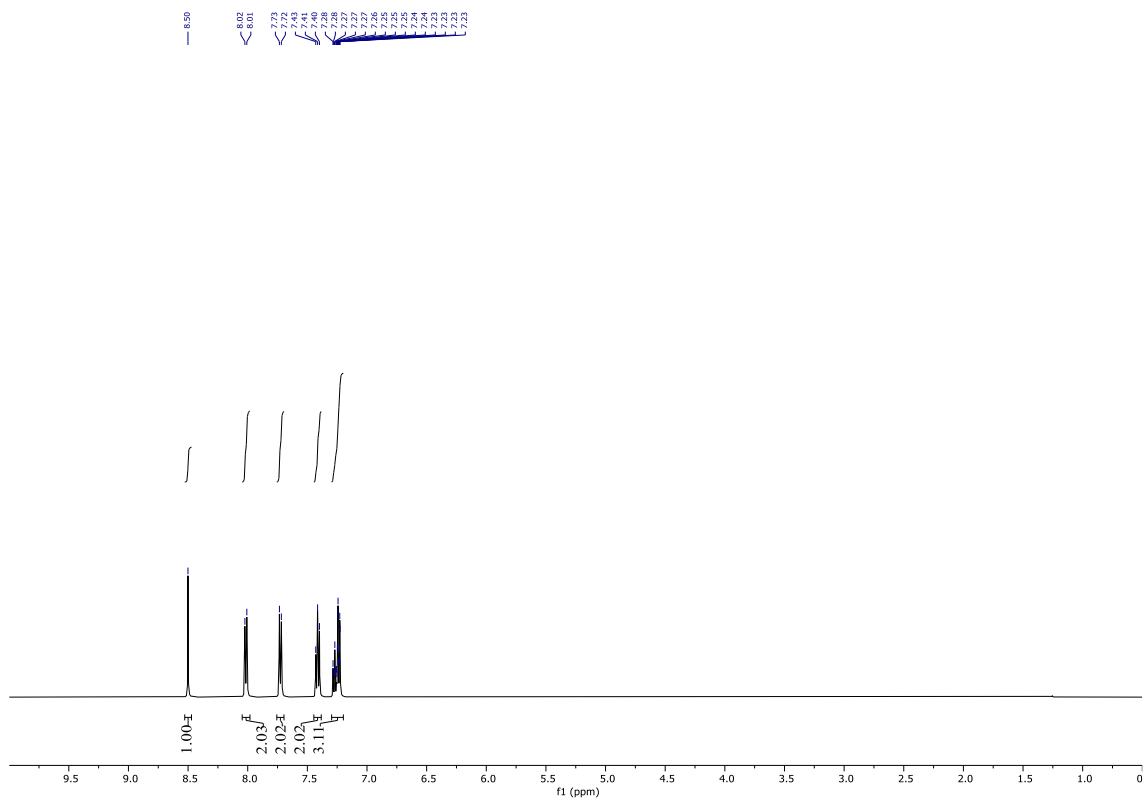

**(E)-N-(4-Chlorophenyl)-1-phenylmethanimine (3k)**

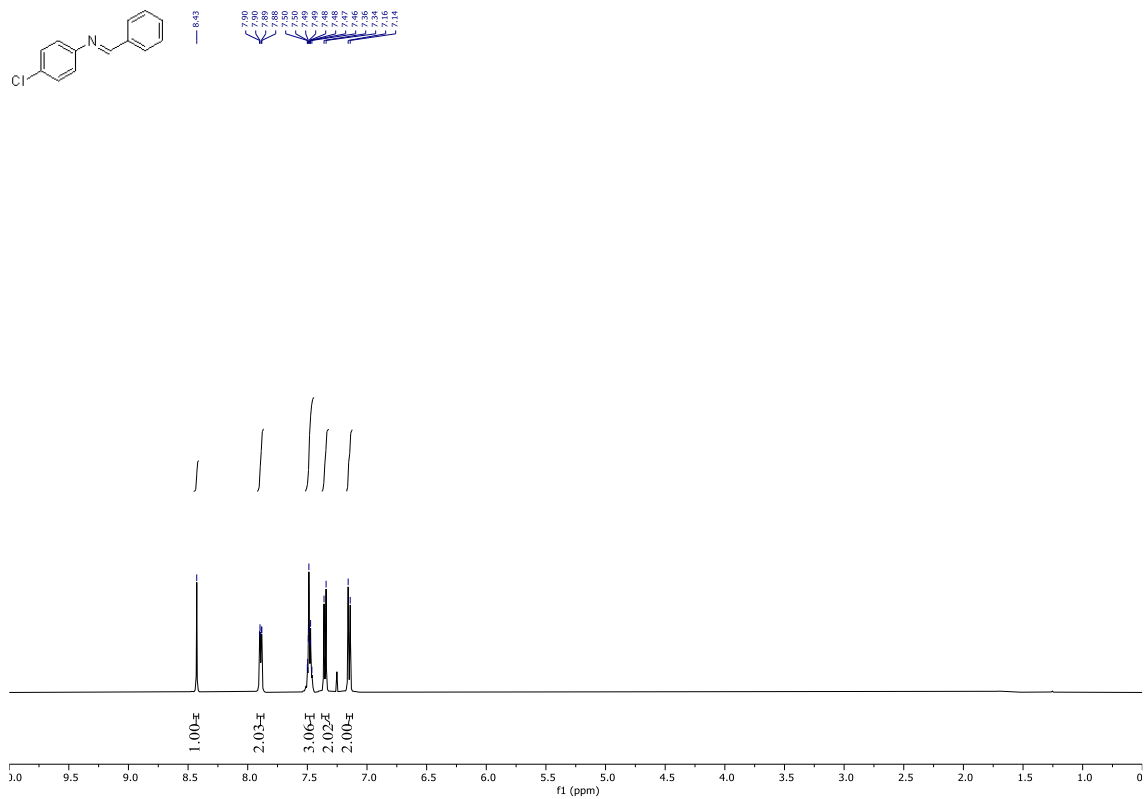

**(E)-N-(4-Methoxyphenyl)-1-phenylmethanimine (3l)**

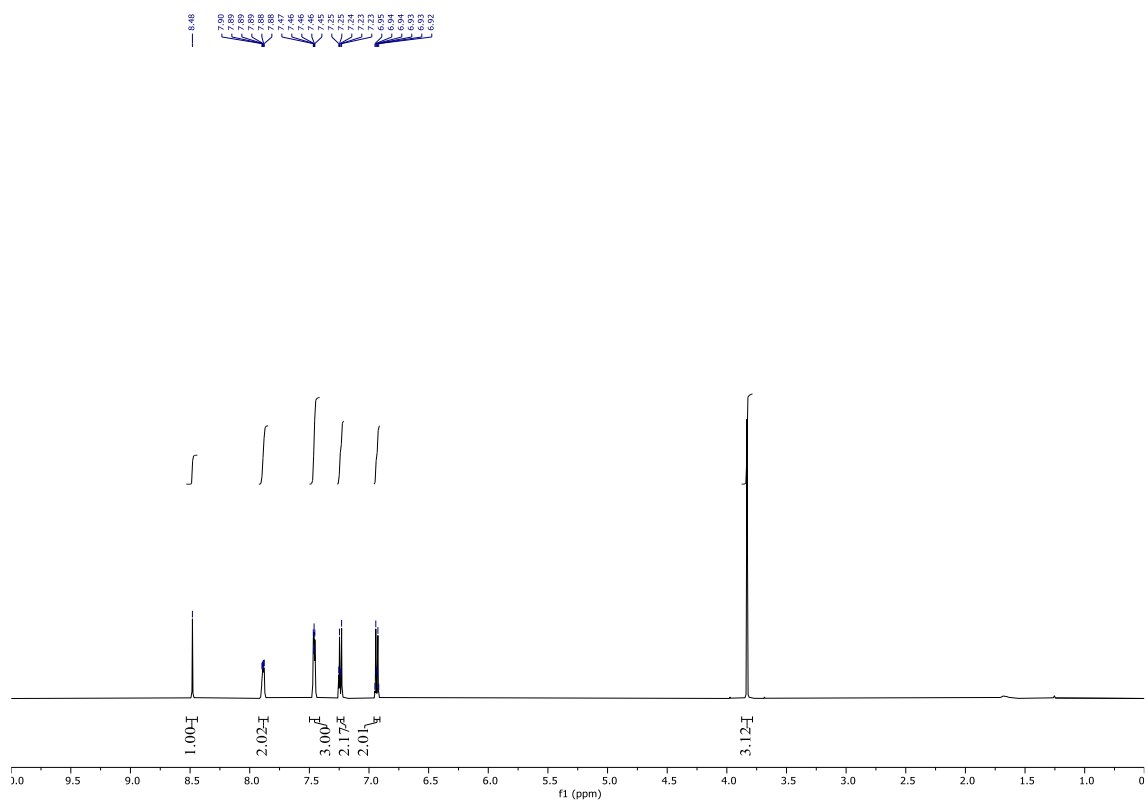

**3-(Benzyl(2-(cyclohexylamino)-2-oxo-1-phenylethyl)amino)-1-oxo-N-phenyl-1H-indene-2-carboxamide (11a)**

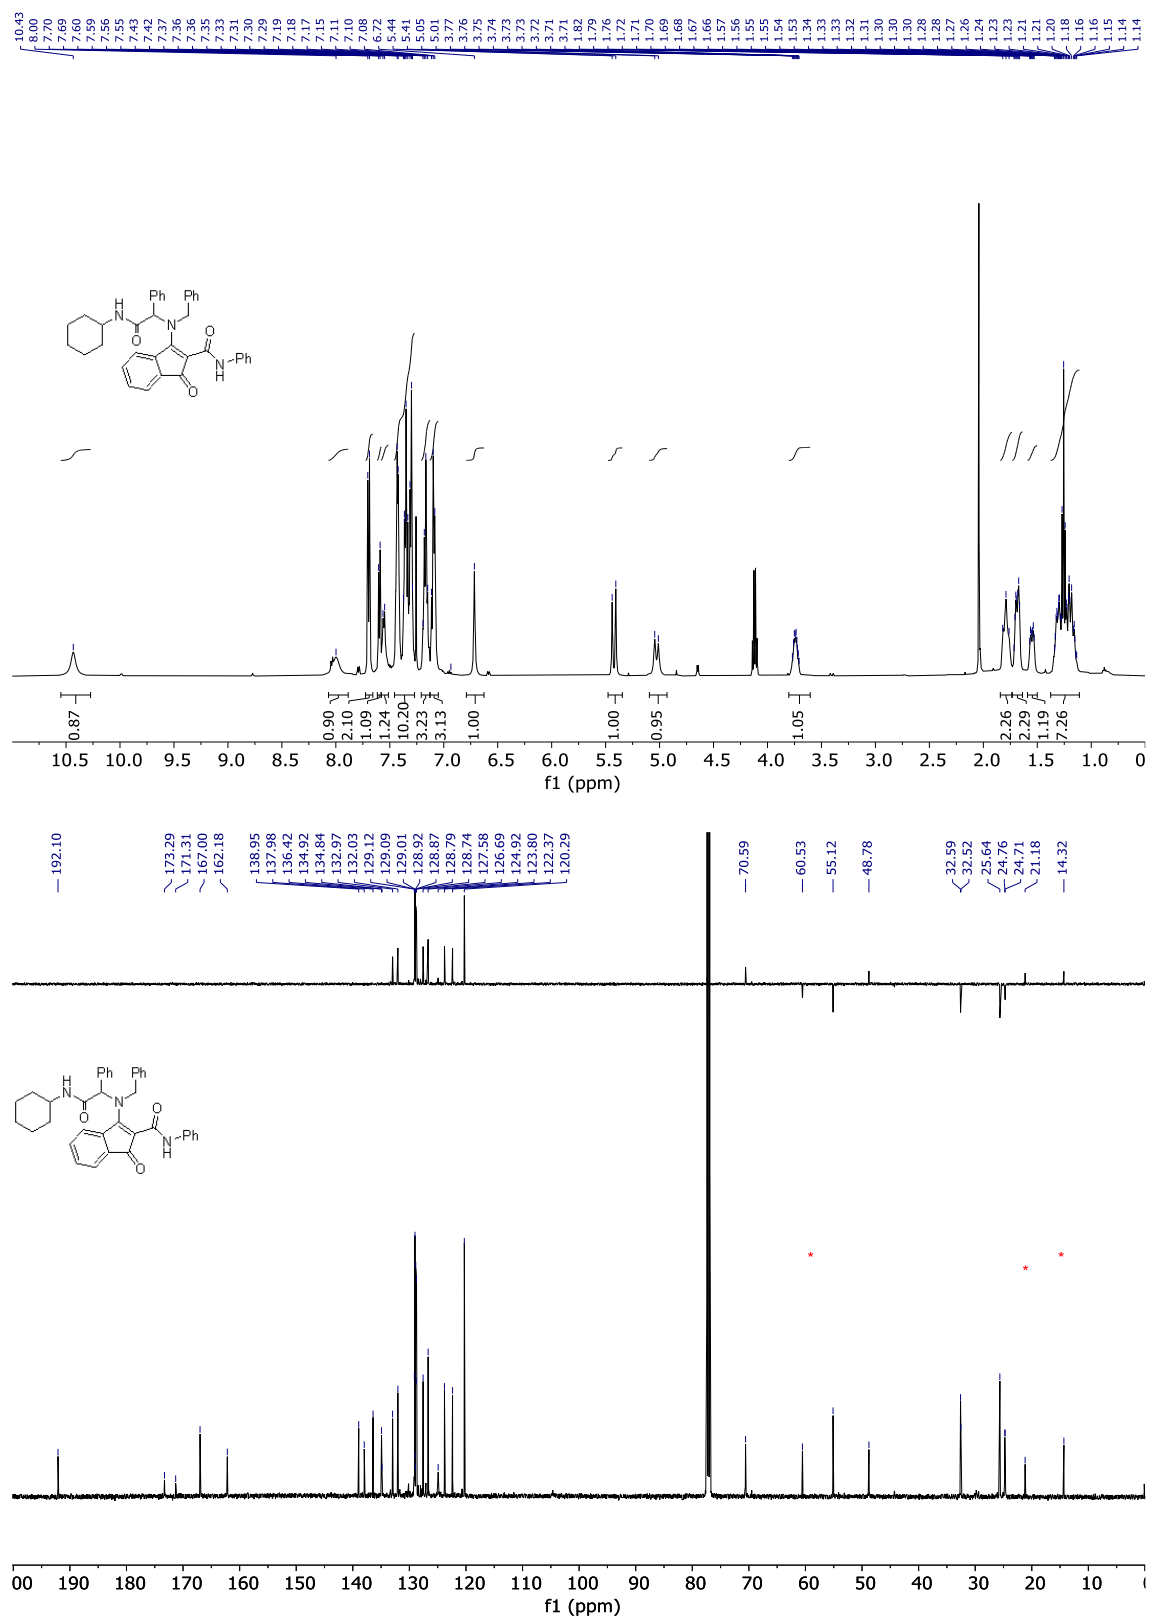



**3-(Benzyl(2-(*tert*-butylamino)-2-oxo-1-phenylethyl)amino)-1-oxo-*N*-phenyl-1*H*-indene-2-carboxamide (11b)**

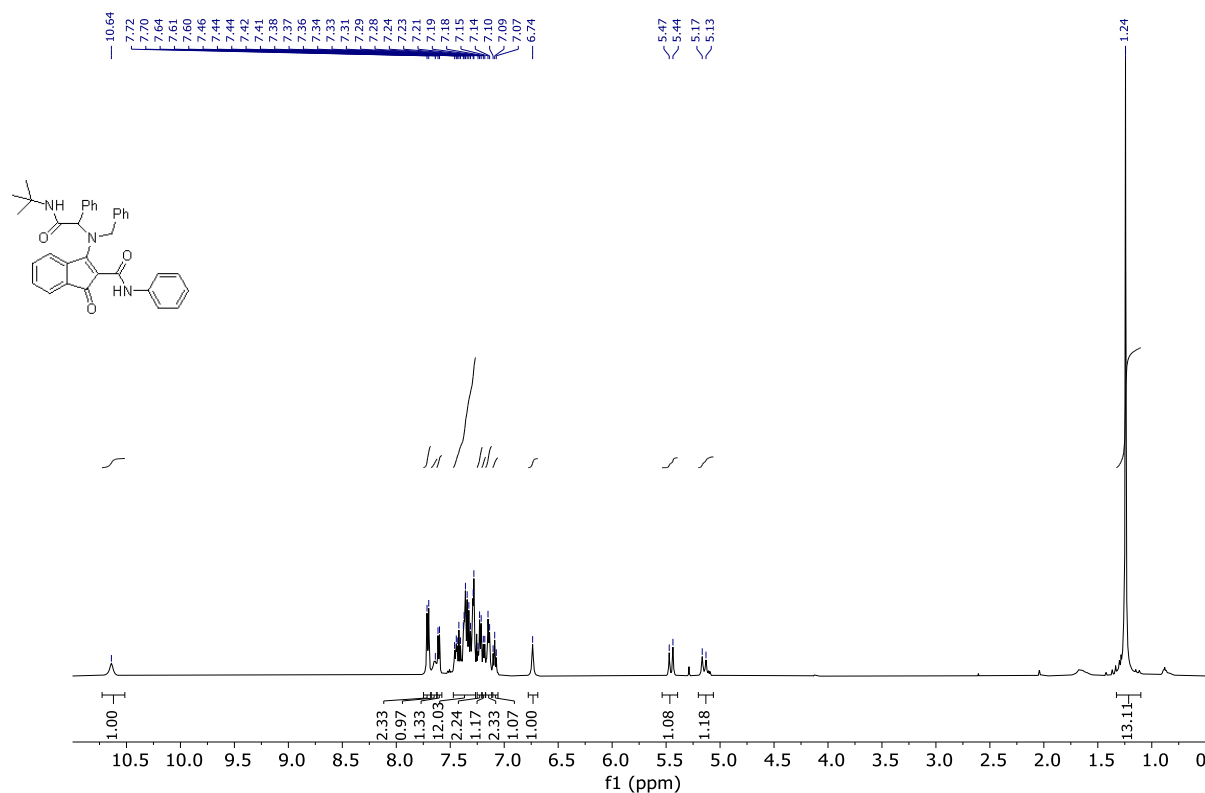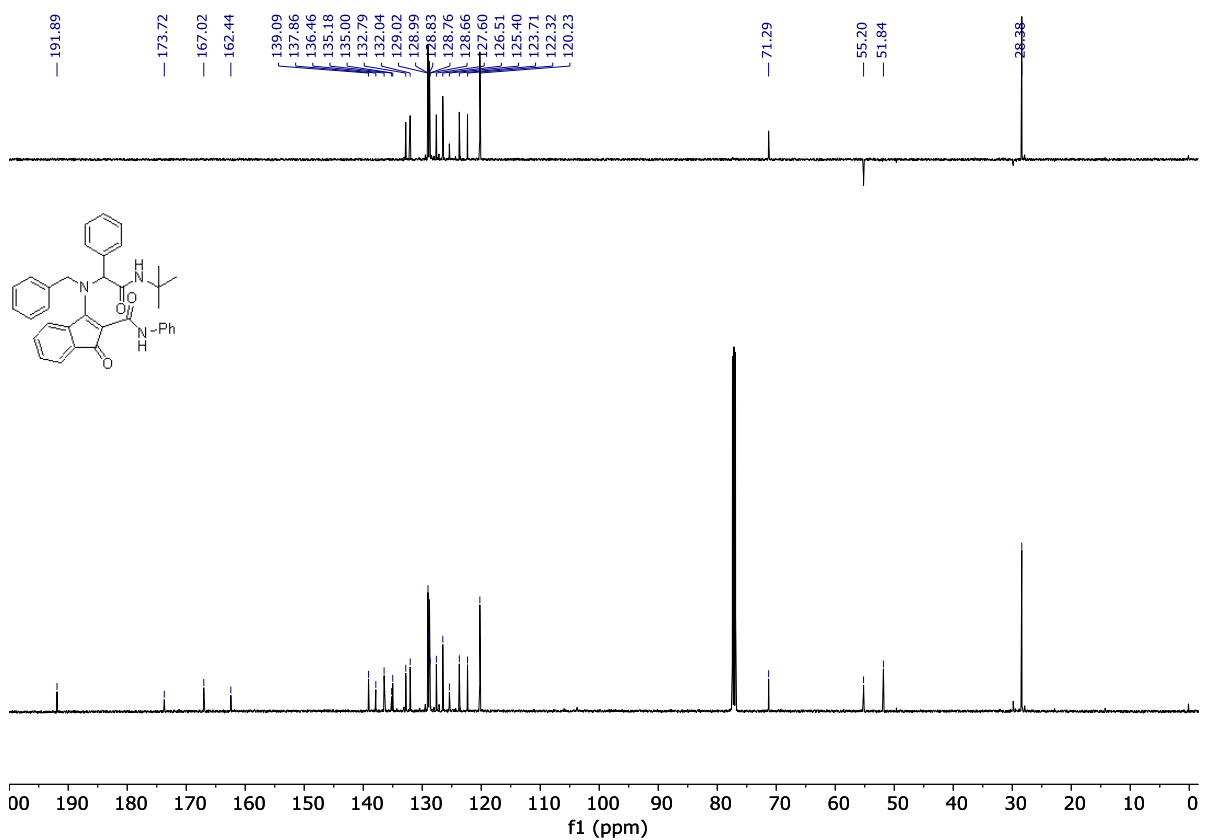

**3-(Benzyl(2-(cyclohexylamino)-1-(furan-2-yl)-2-oxoethyl)amino)-1-oxo-N-phenyl-1H-indene-2-carboxamide (11c)**

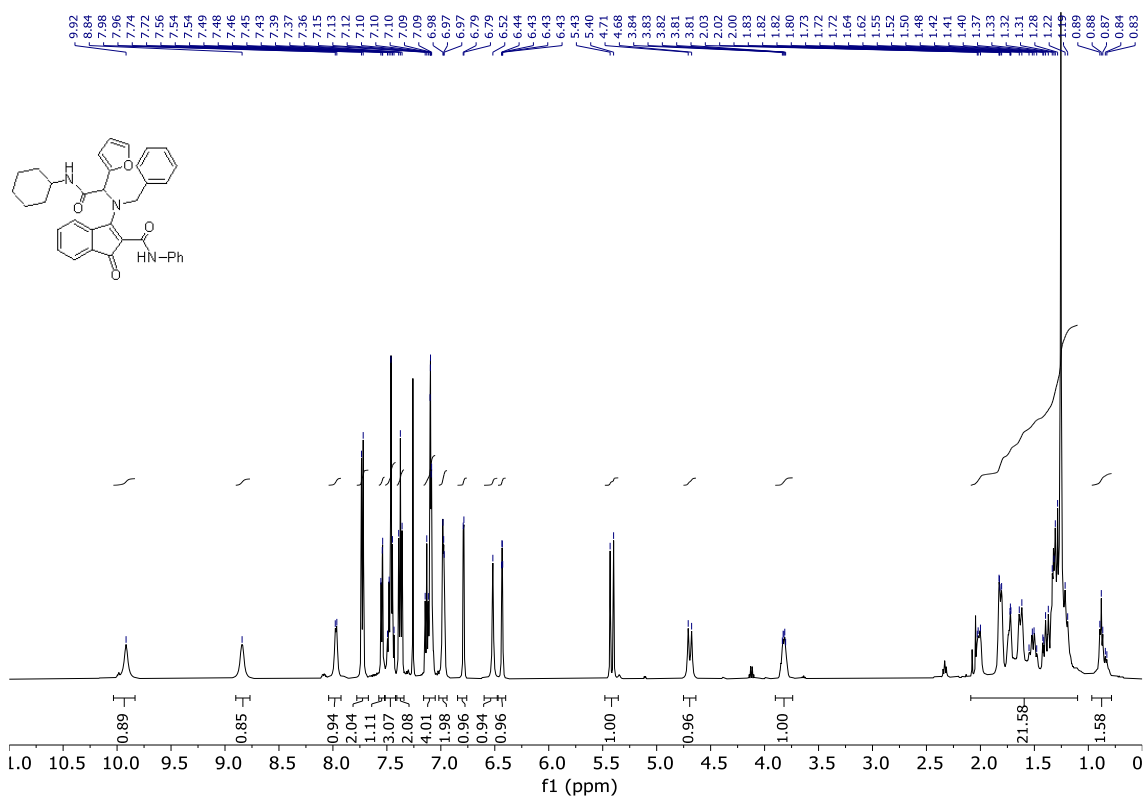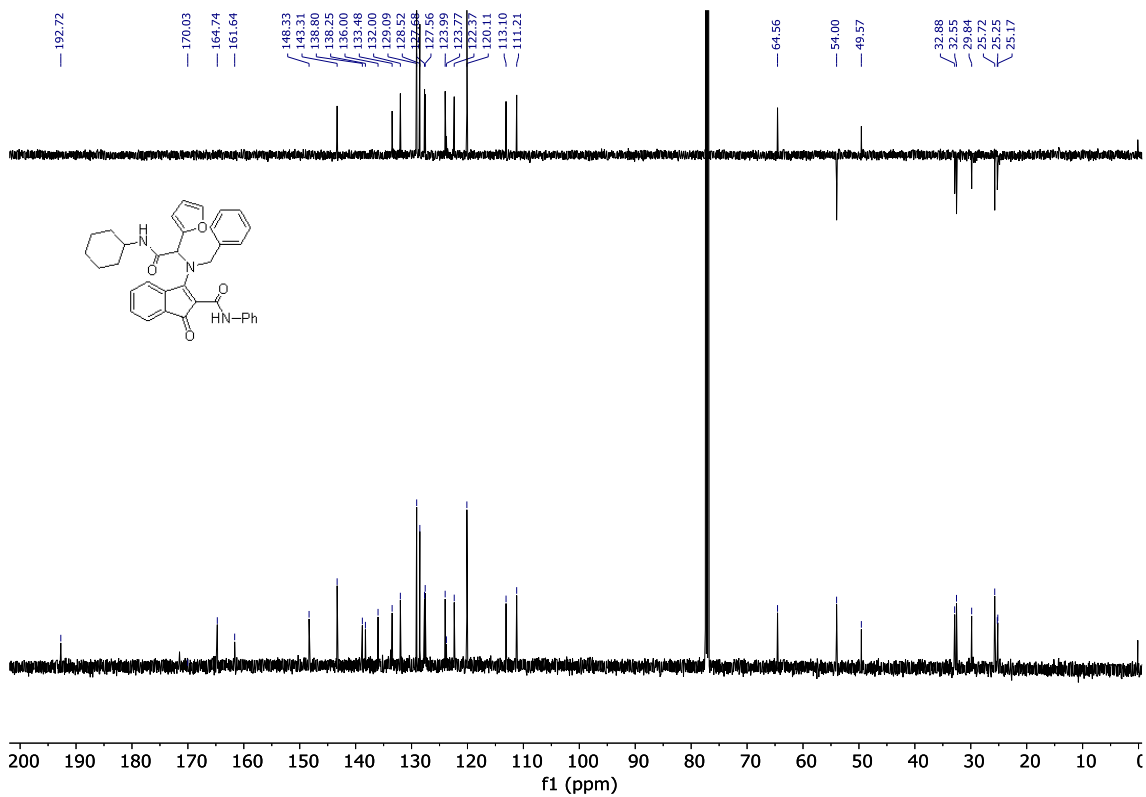

**3-((Benzo[d][1,3]dioxol-5-ylmethyl)(2-(*tert*-butylamino)-2-oxo-1-phenylethyl)amino)-1-oxo-*N*-phenyl-1*H*-indene-2-carboxamide (11d)**

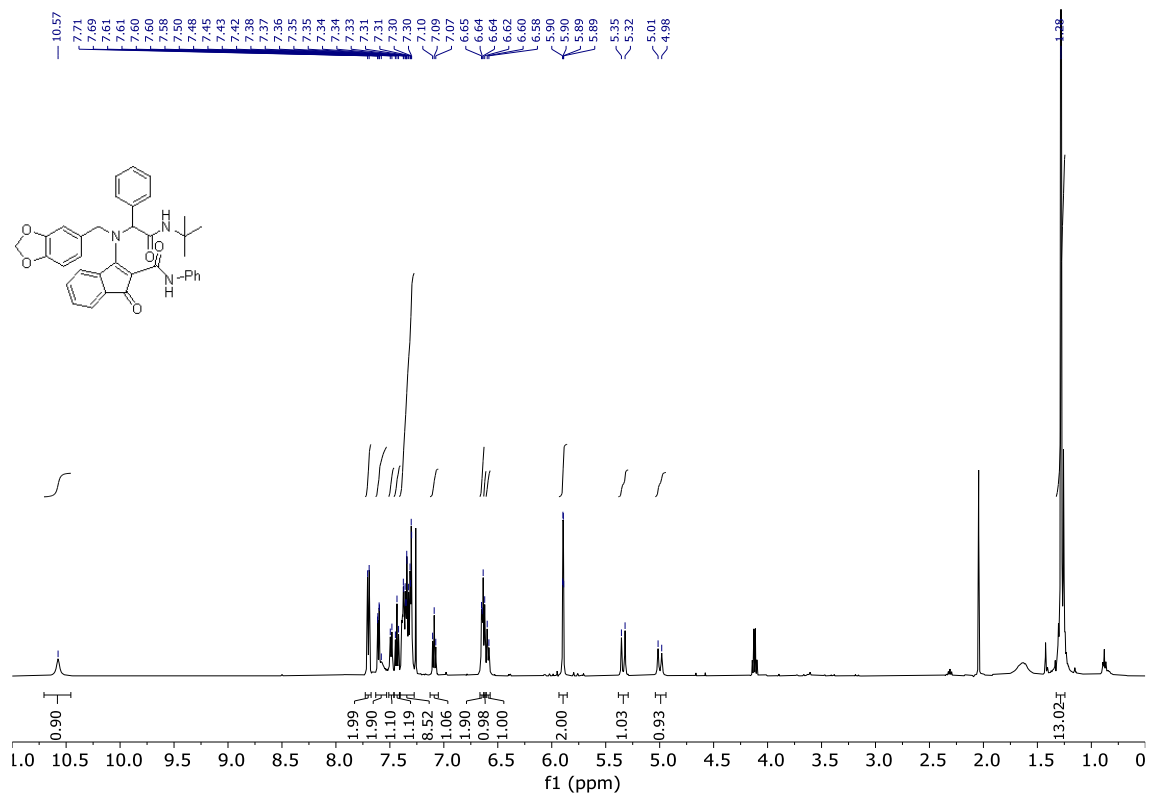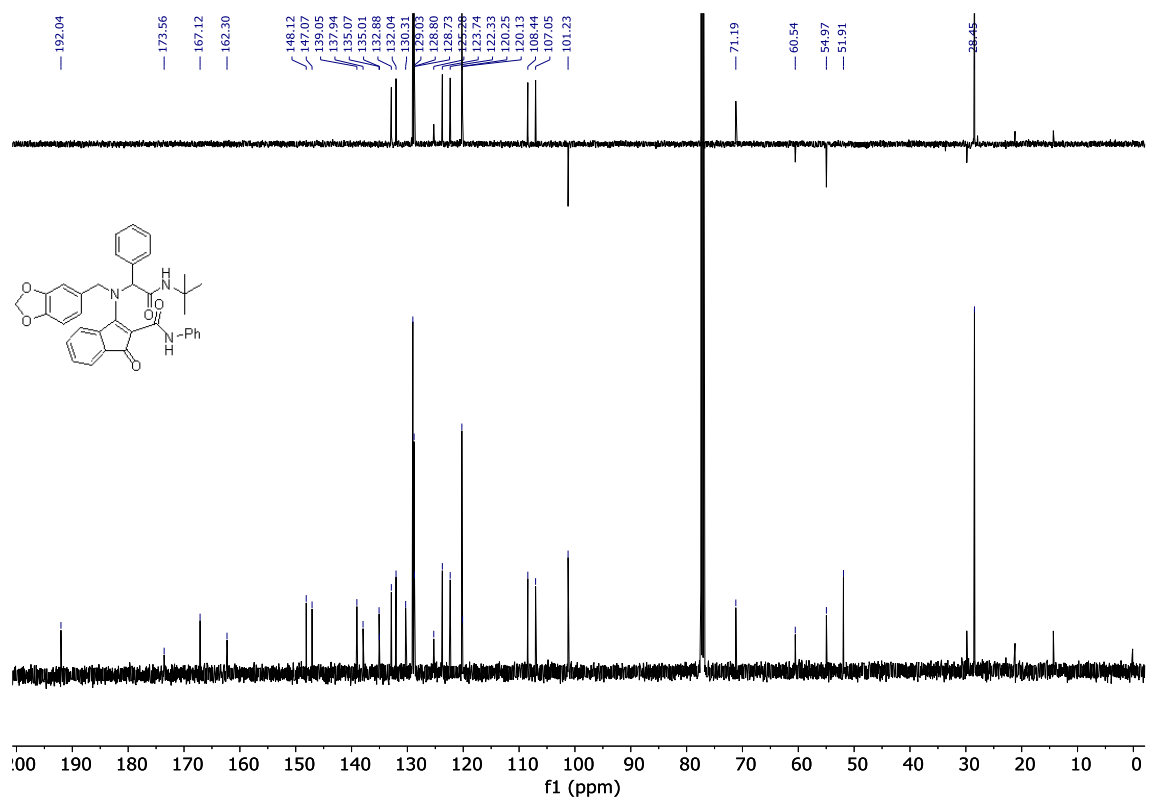

**Ethyl 3-((1-(2-bromophenyl)-2-(cyclohexylamino)-2-oxoethyl)(1-oxo-2-(phenylcarbamoyl)-1H-inden-3-yl)amino)propanoate (11e)**

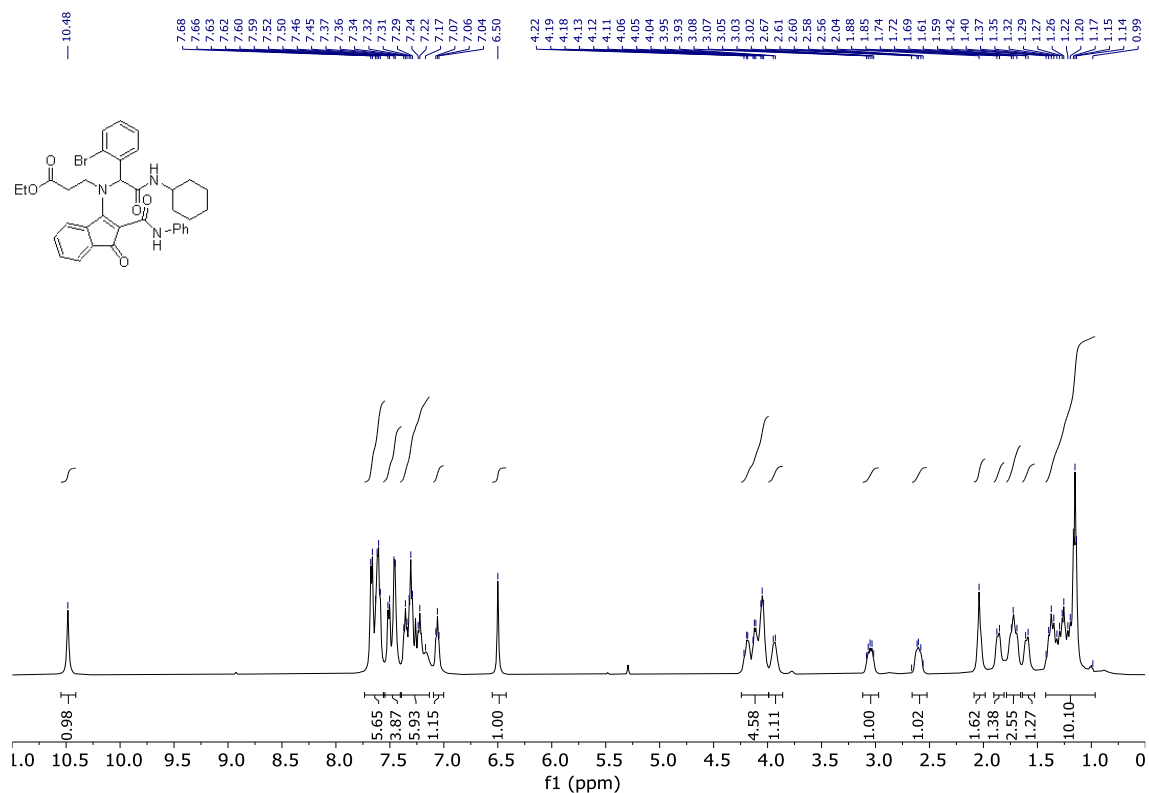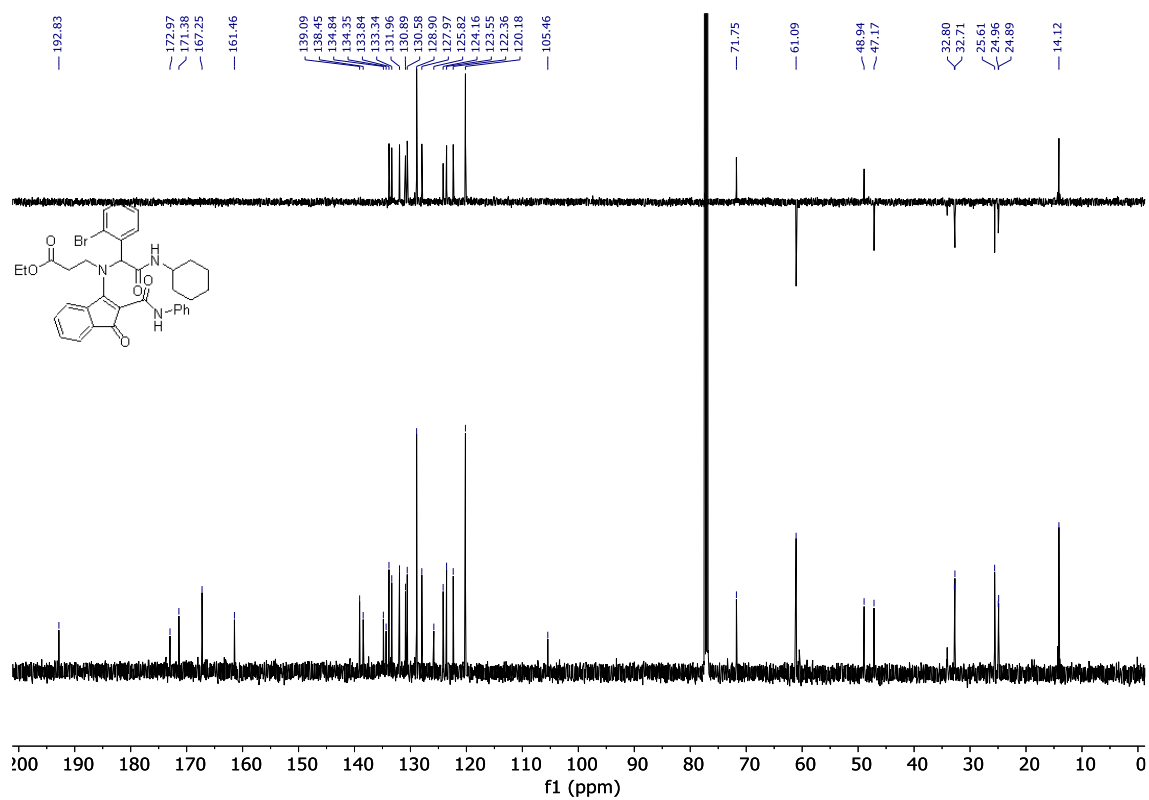

**Ethyl 3-((1-(2-bromophenyl)-2-(*tert*-butylamino)-2-oxoethyl)(1-oxo-2-(phenylcarbamoyl)-1*H*-inden-3-yl)amino)propanoate (11f)**

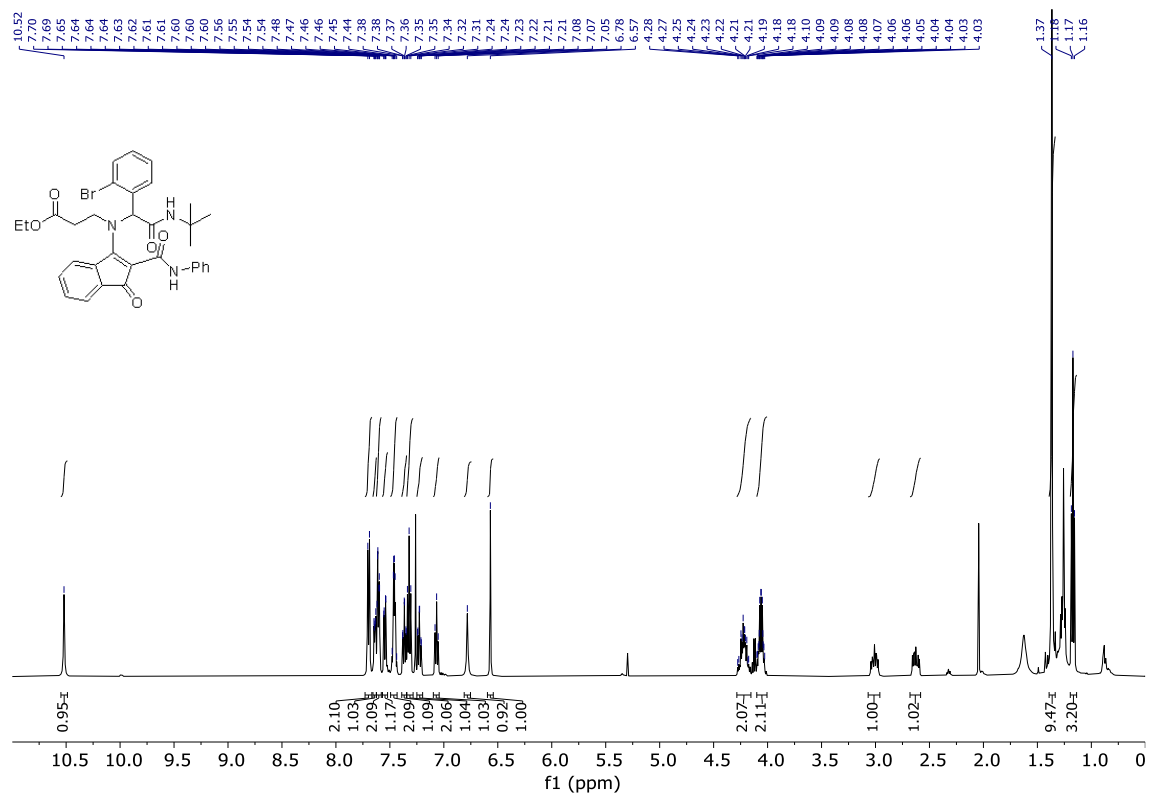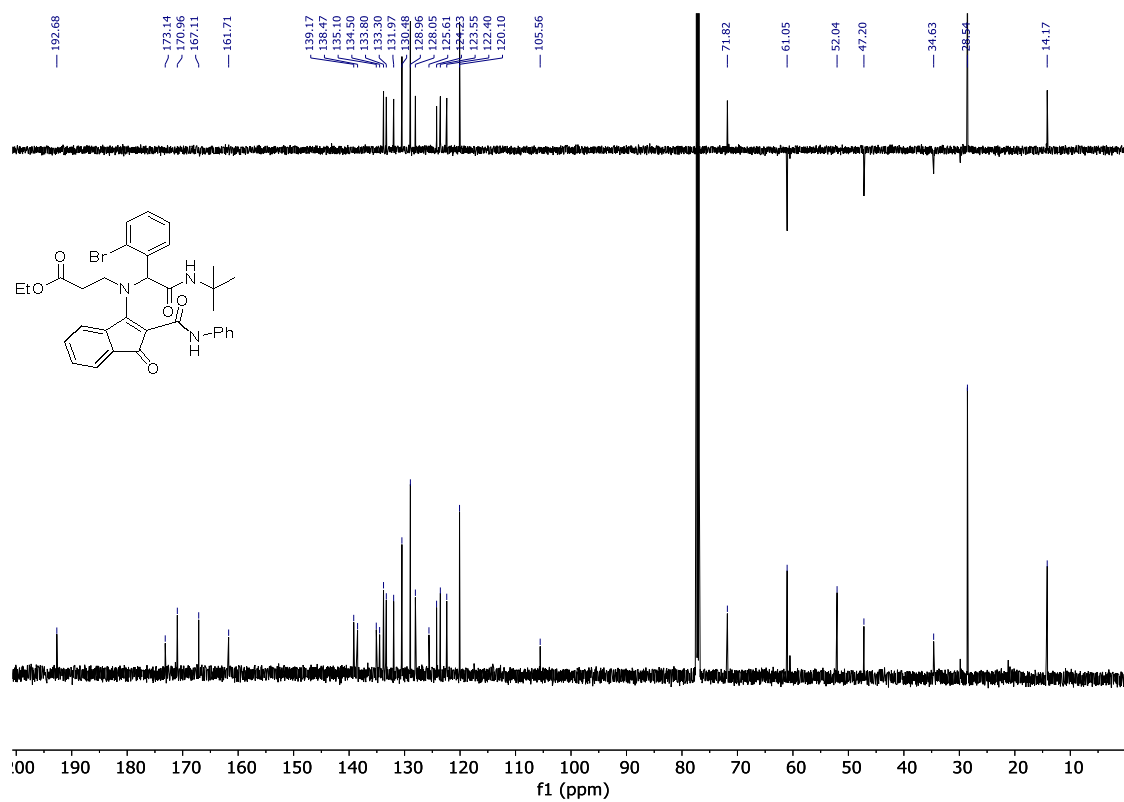

**Ethyl 3-((2-(cyclohexylamino)-2-oxo-1-(*p*-tolyl)ethyl)(1-oxo-2-(phenylcarbamoyl)-1*H*-inden-3-yl)amino)propanoate (11g)**

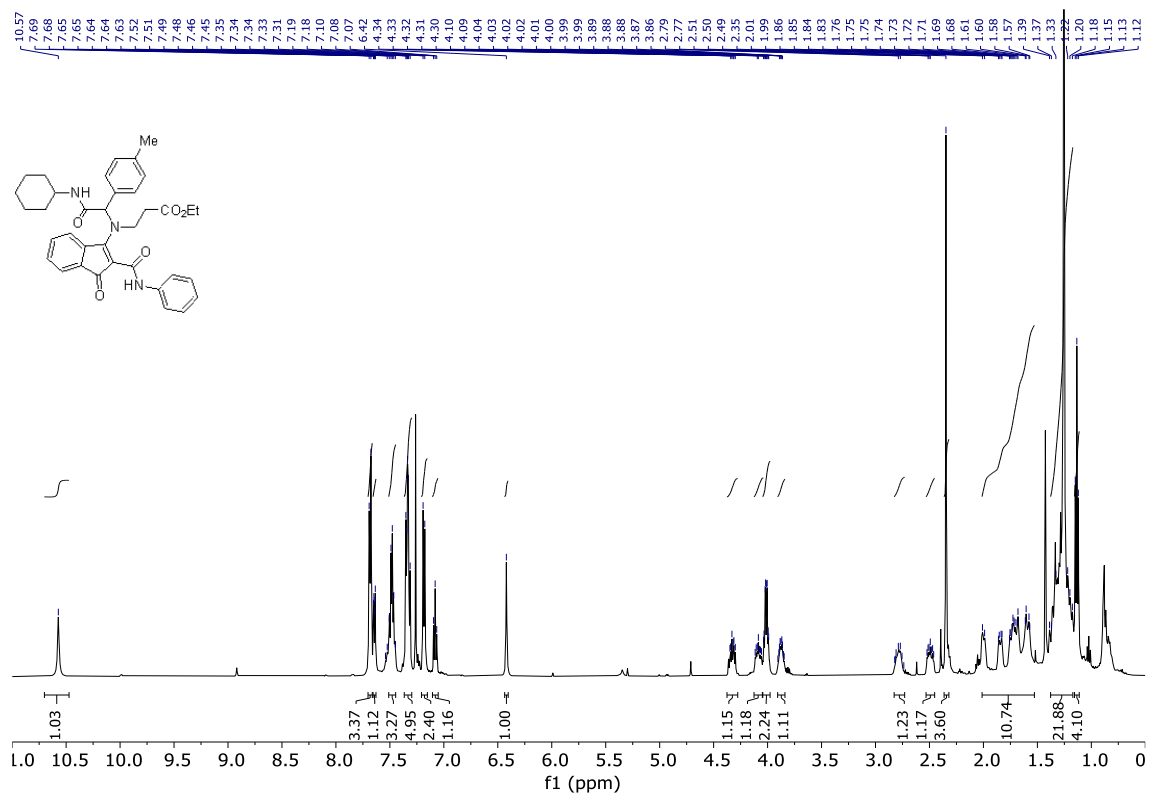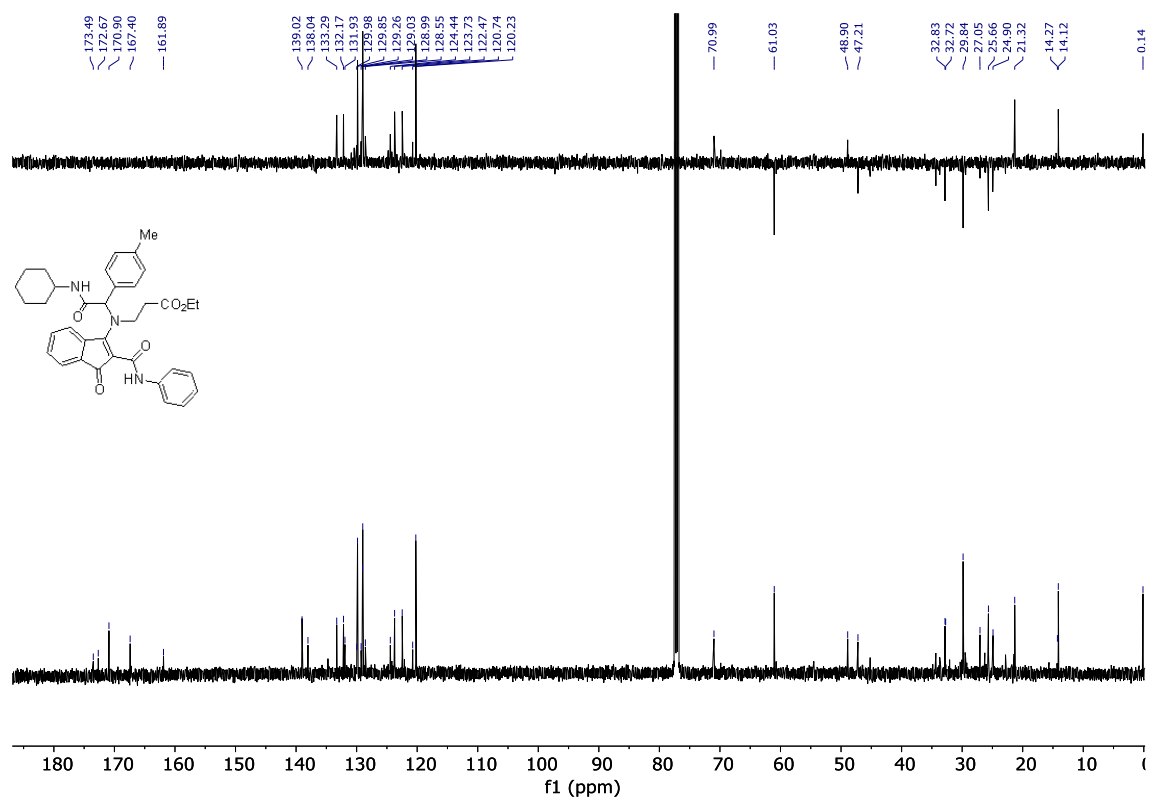

**3-((2-(Cyclohexylamino)-2-oxo-1-phenylethyl)(phenyl)amino)-1-oxo-N-phenyl-1H-indene-2-carboxamide (11h)**

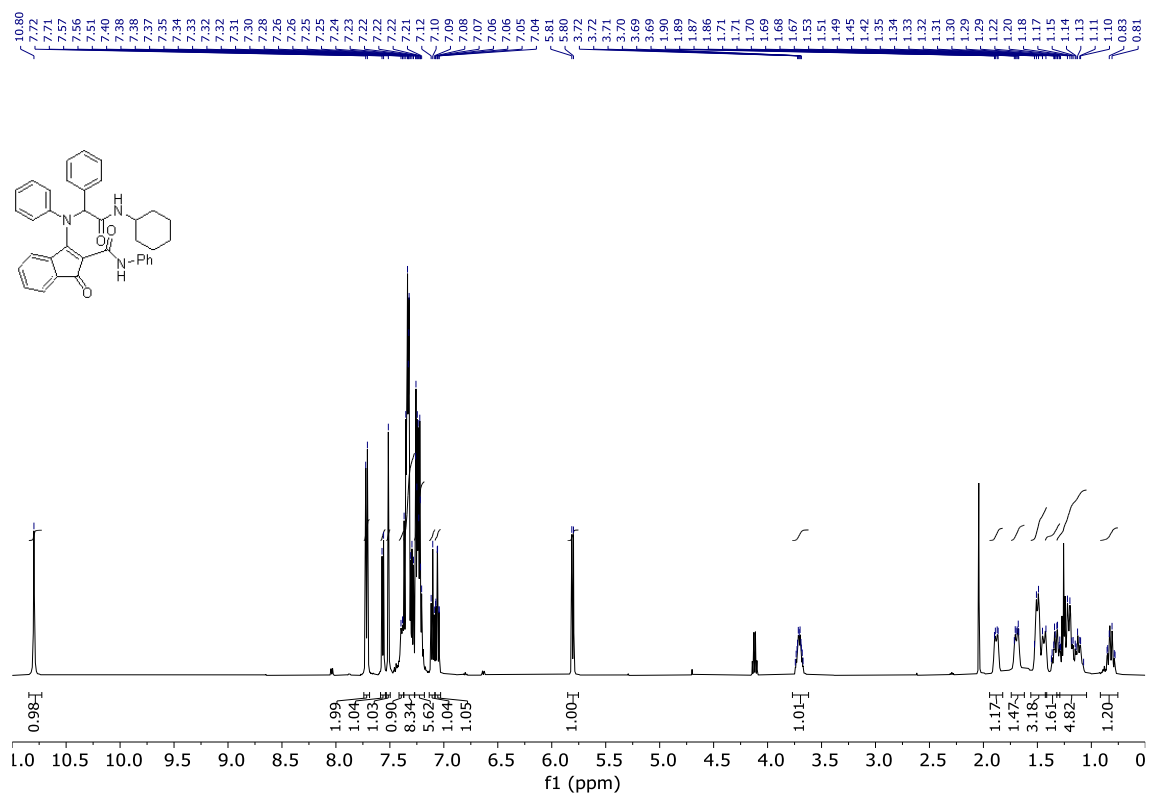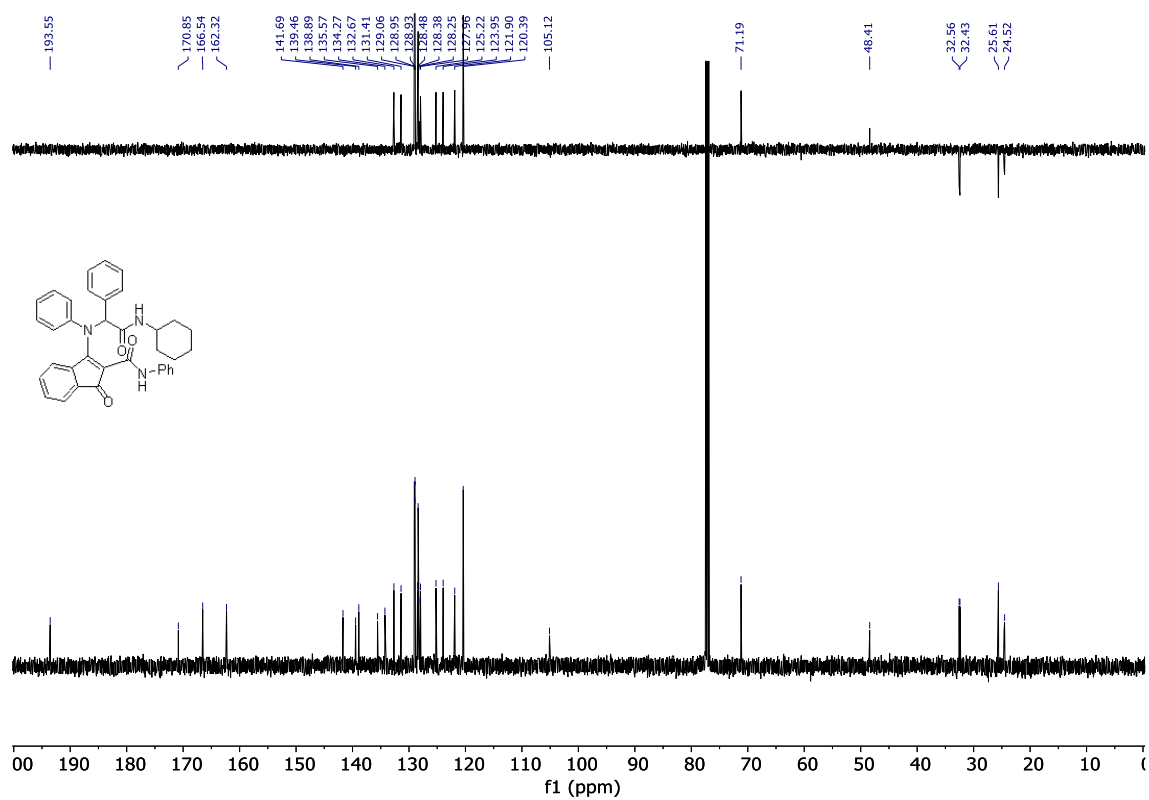

**3-((2-*tert*-Butylamino)-2-oxo-1-phenylethyl)(phenyl)amino)-1-oxo-*N*-phenyl-1*H*-indene-2-carboxamide (11i)**

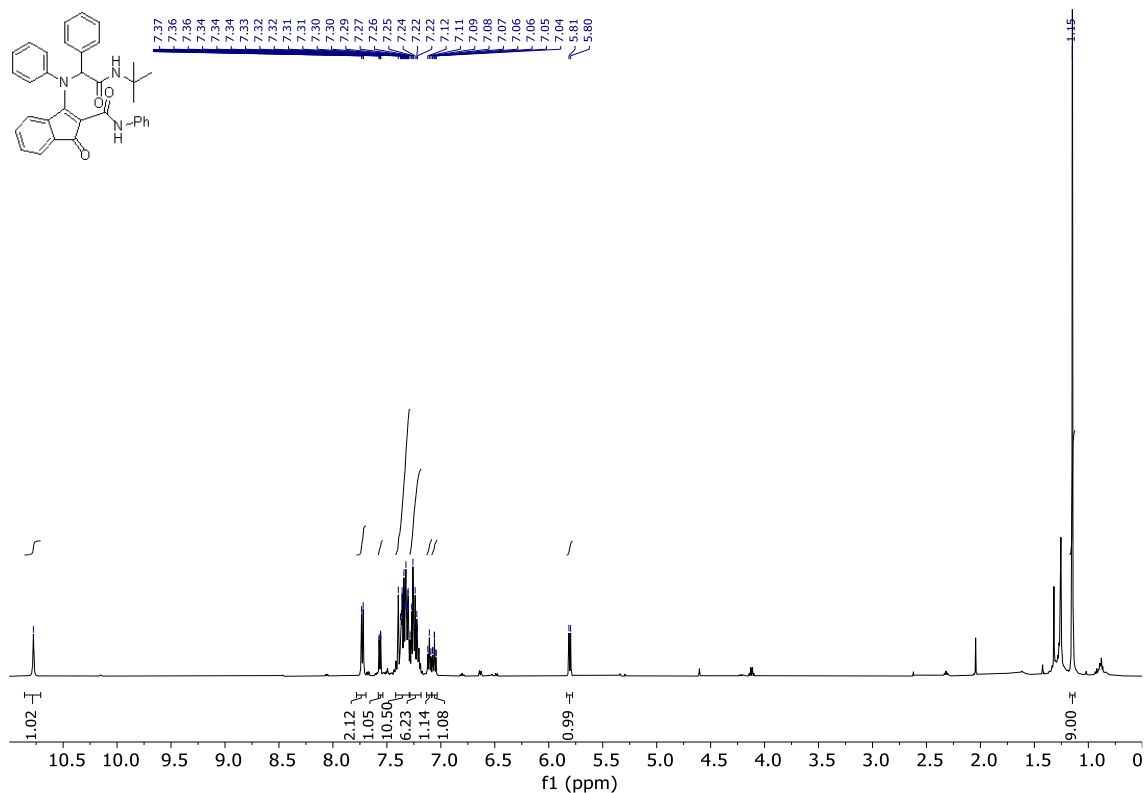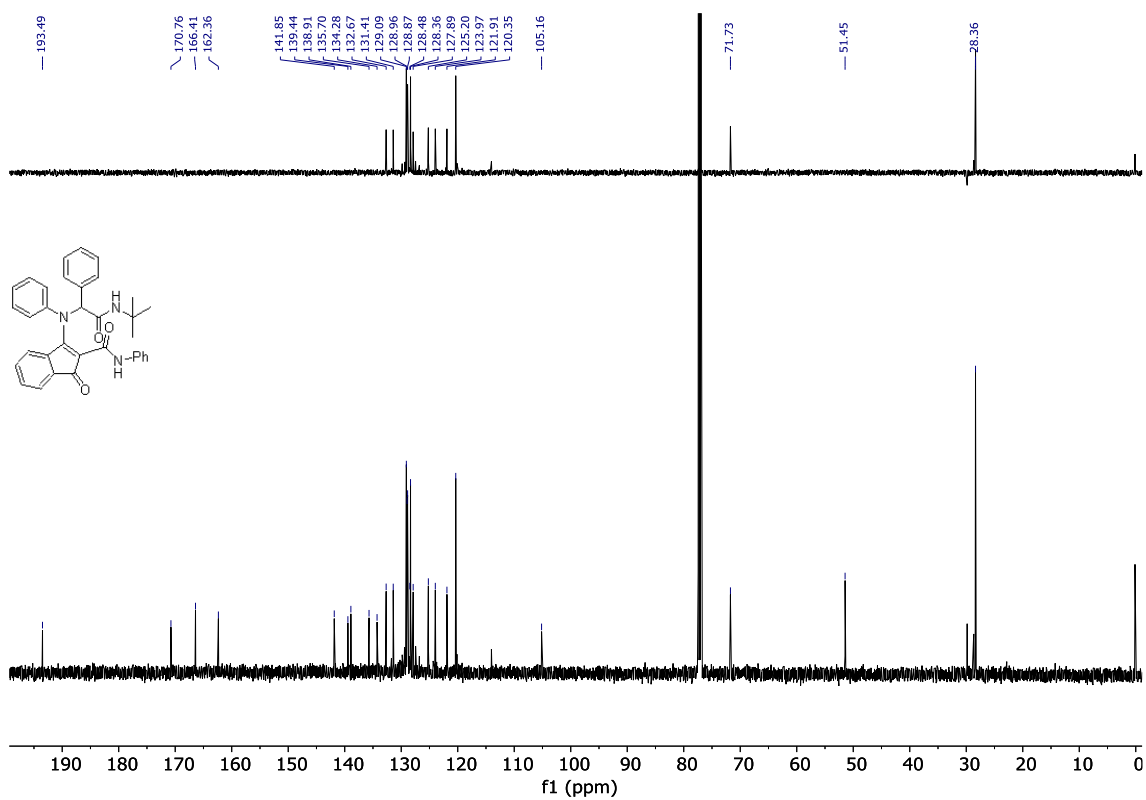



**3-((2-(Cyclohexylamino)-2-oxo-1-(*p*-tolyl)ethyl)(phenyl)amino)-1-oxo-*N*-phenyl-1*H*-indene-2-carboxamide (11j)**

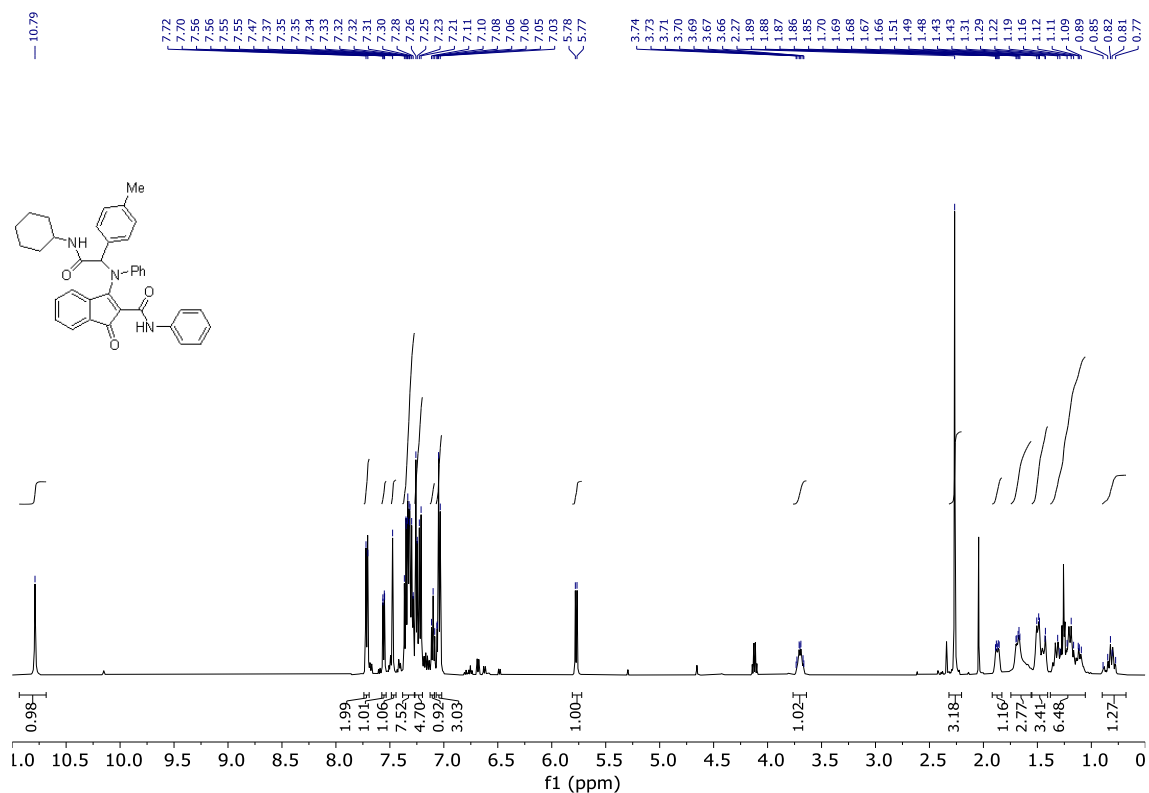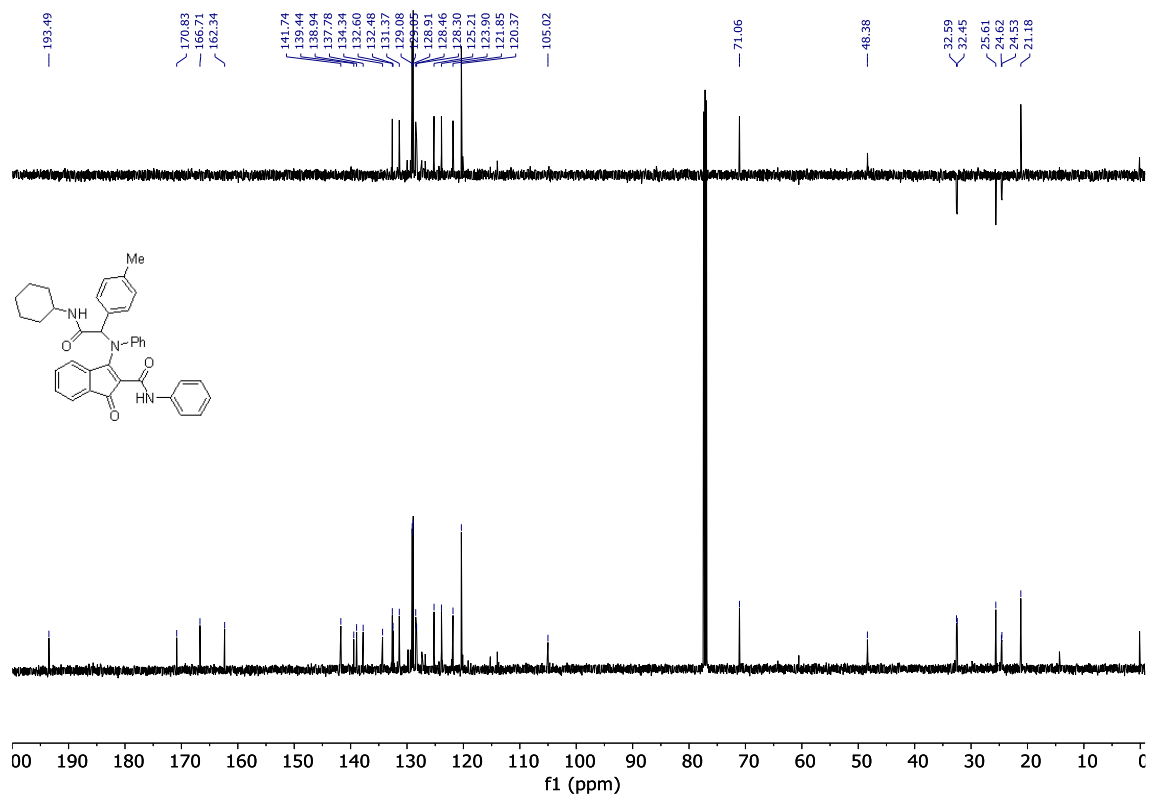

**3-((2-*tert*-Butylamino)-1-(4-methoxyphenyl)-2-oxoethyl)(phenylamino)-1-oxo-*N*-phenyl-1*H*-indene-2-carboxamide (11k)**

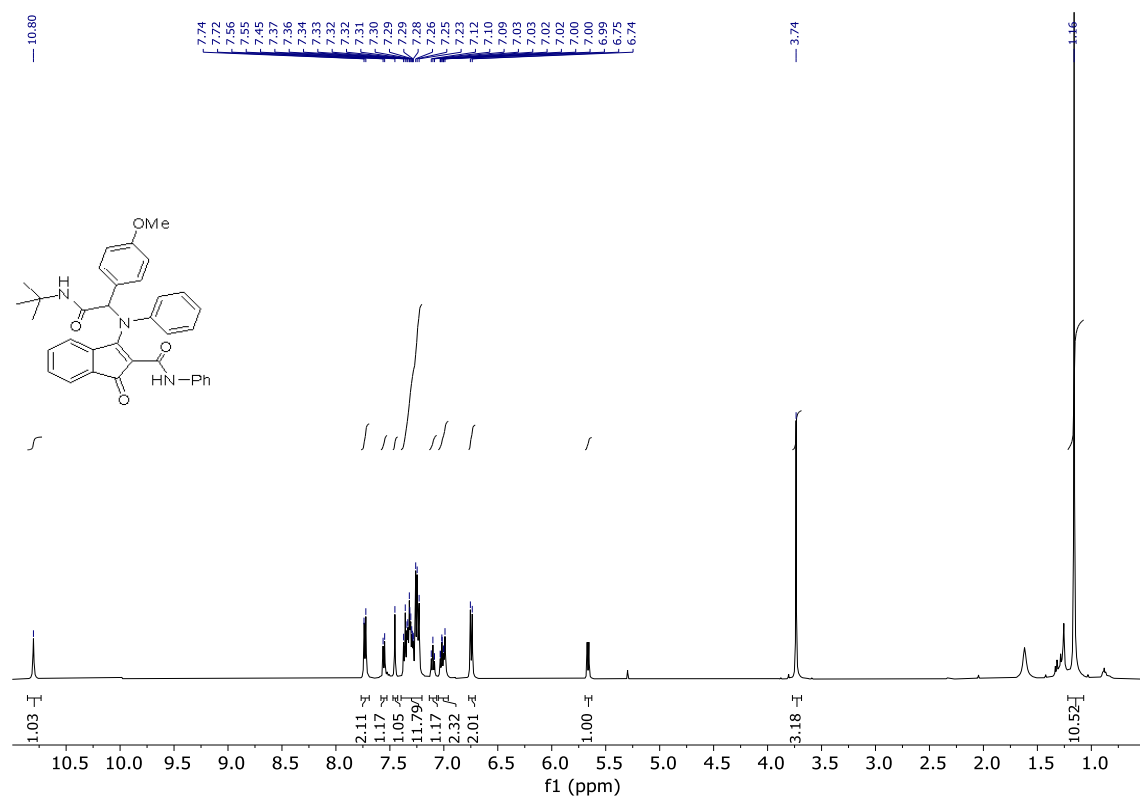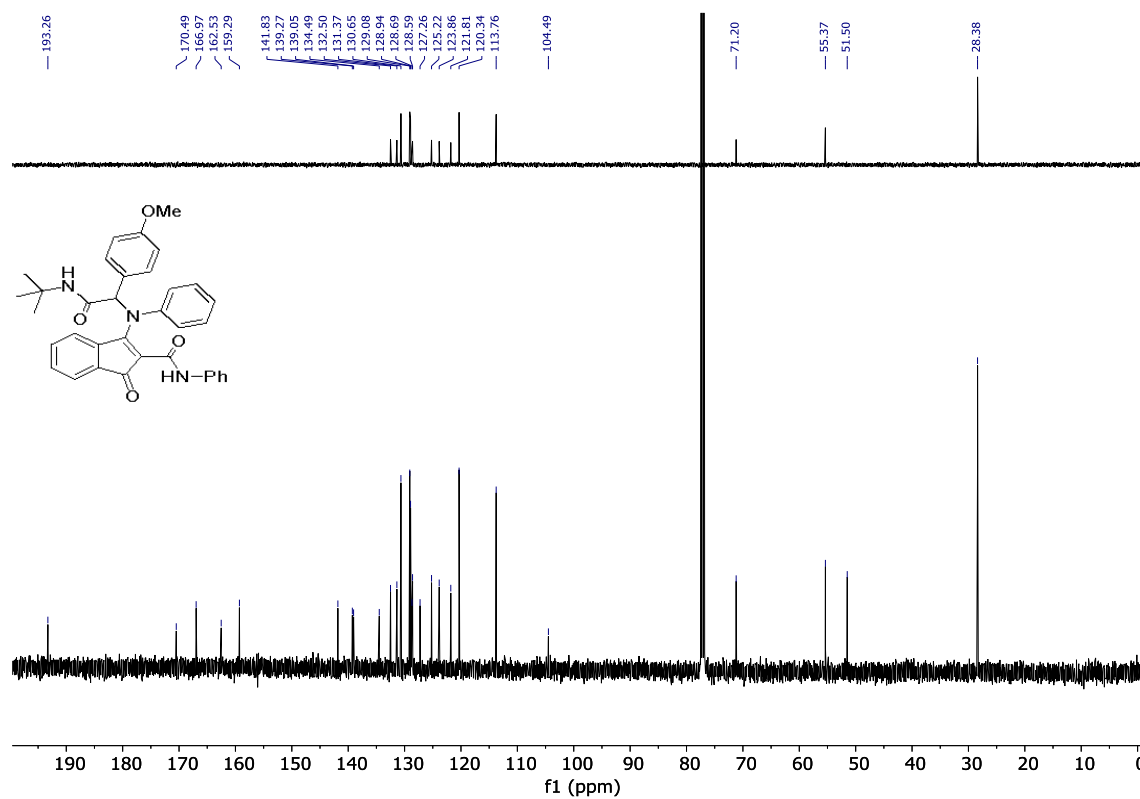

**3-((1-(Benzo[d][1,3]dioxol-5-yl)-2-(*tert*-butylamino)-2-oxoethyl)(phenyl)amino)-1-oxo-*N*-phenyl-1*H*-indene-2-carboxamide (11l)**

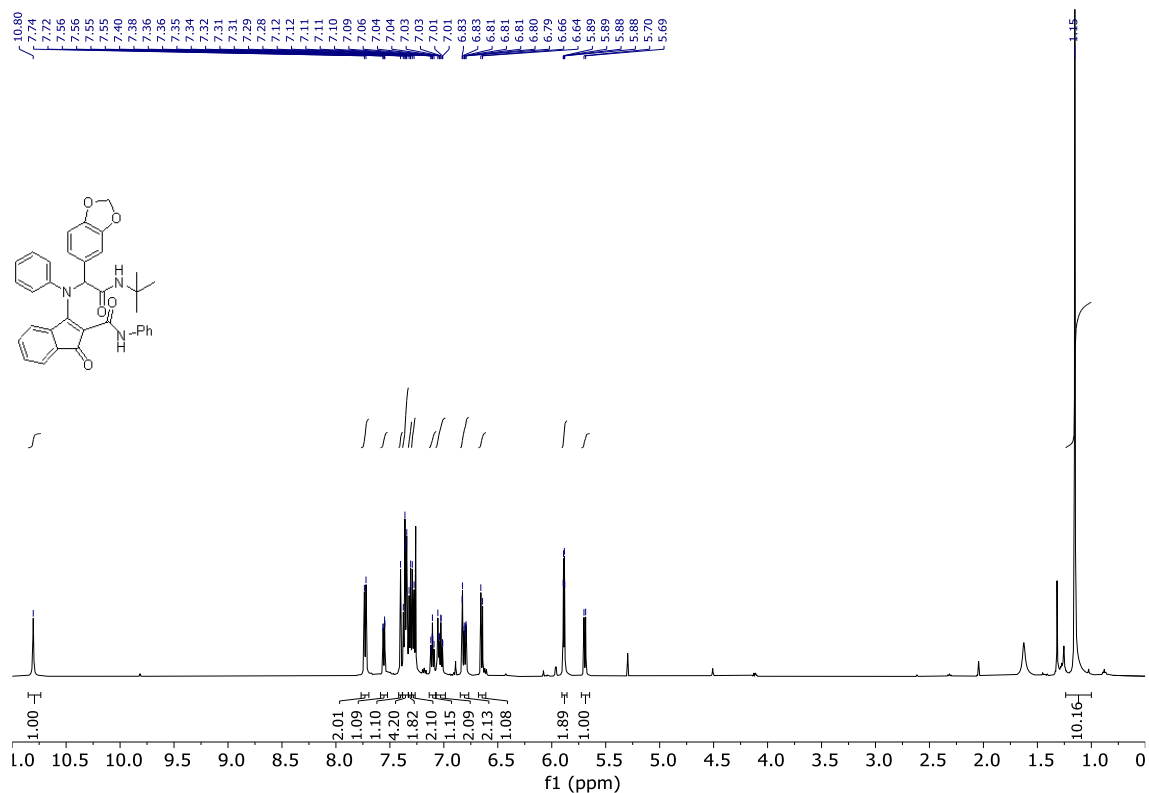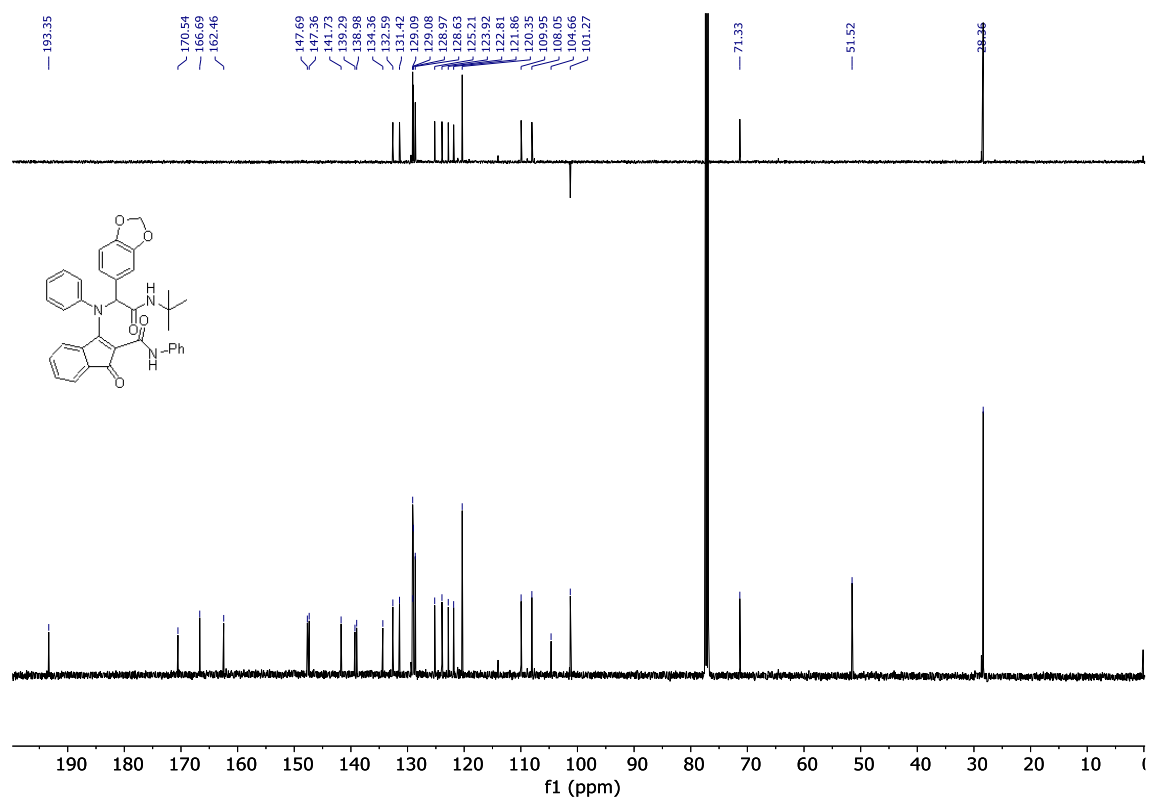

**3-(Benzyl(1-(*tert*-butylamino)-3-methyl-1-oxobutan-2-yl)amino)-1-oxo-*N*-phenyl-1*H*-indene-2-carboxamide (11m)**

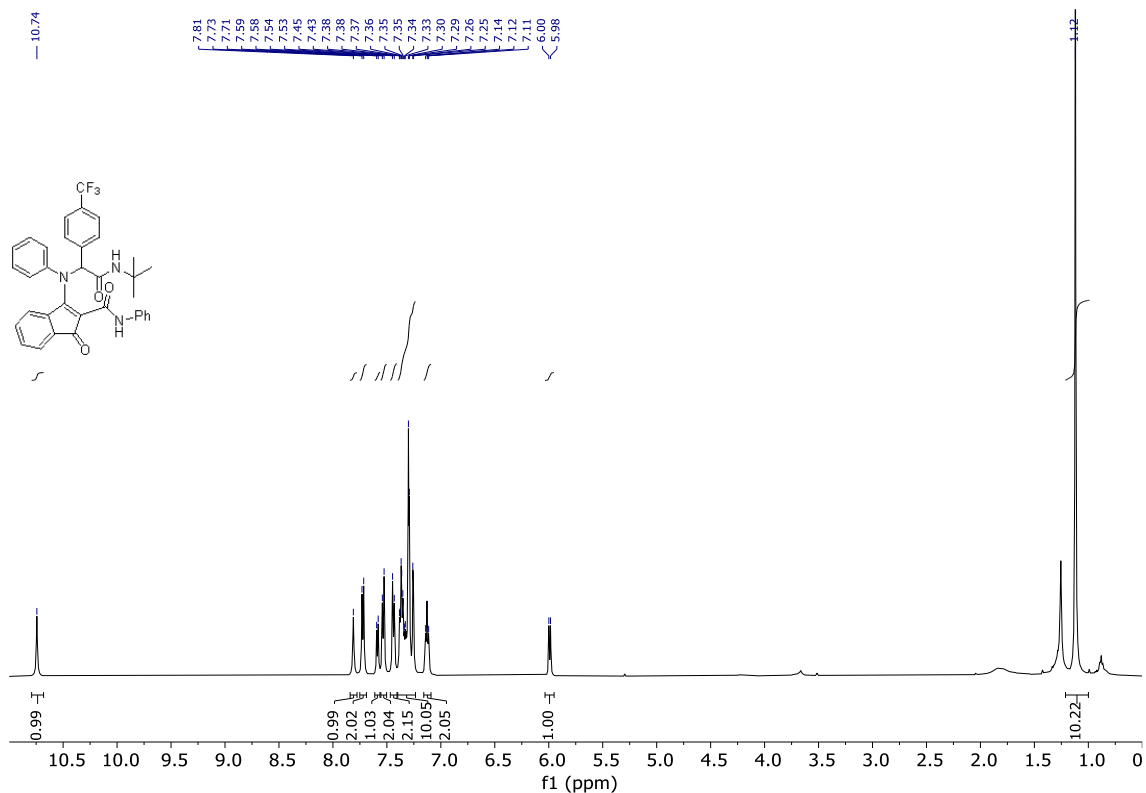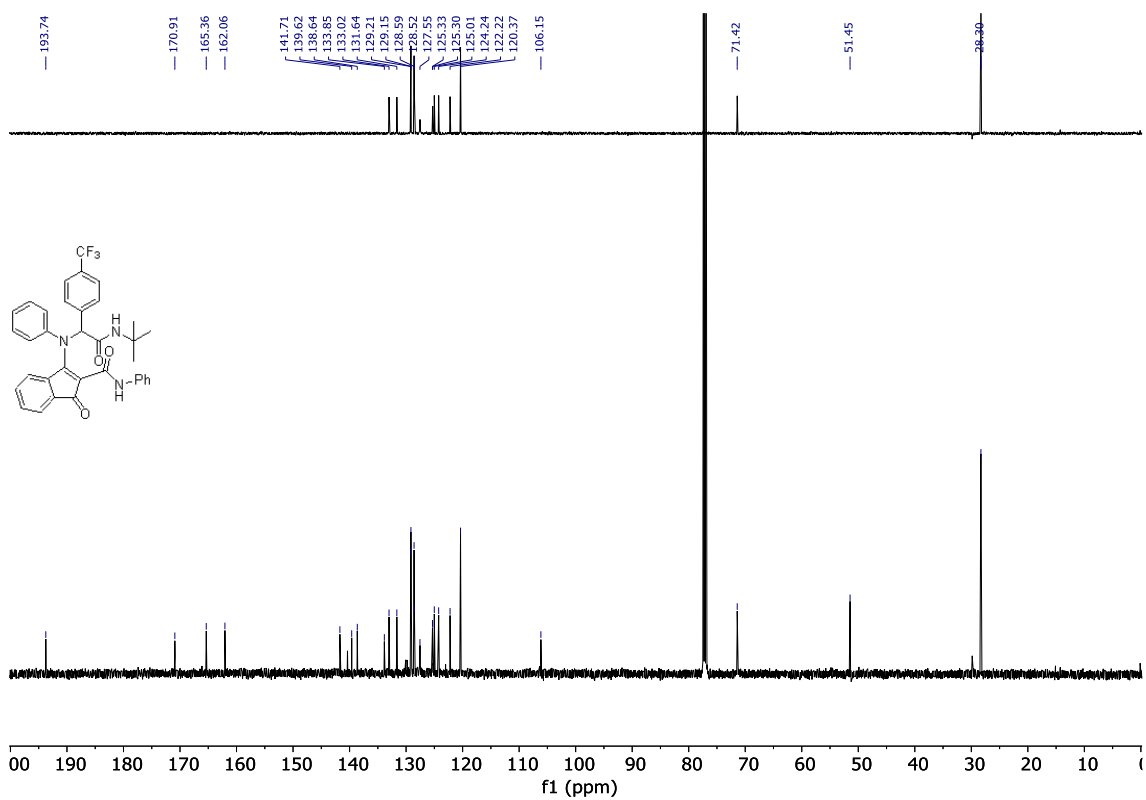

**3-((2-((2,6-Dimethylphenyl)amino)-2-oxo-1-phenylethyl)(phenyl)amino)-1-oxo-N-phenyl-1H-indene-2-carboxamide (11n)**

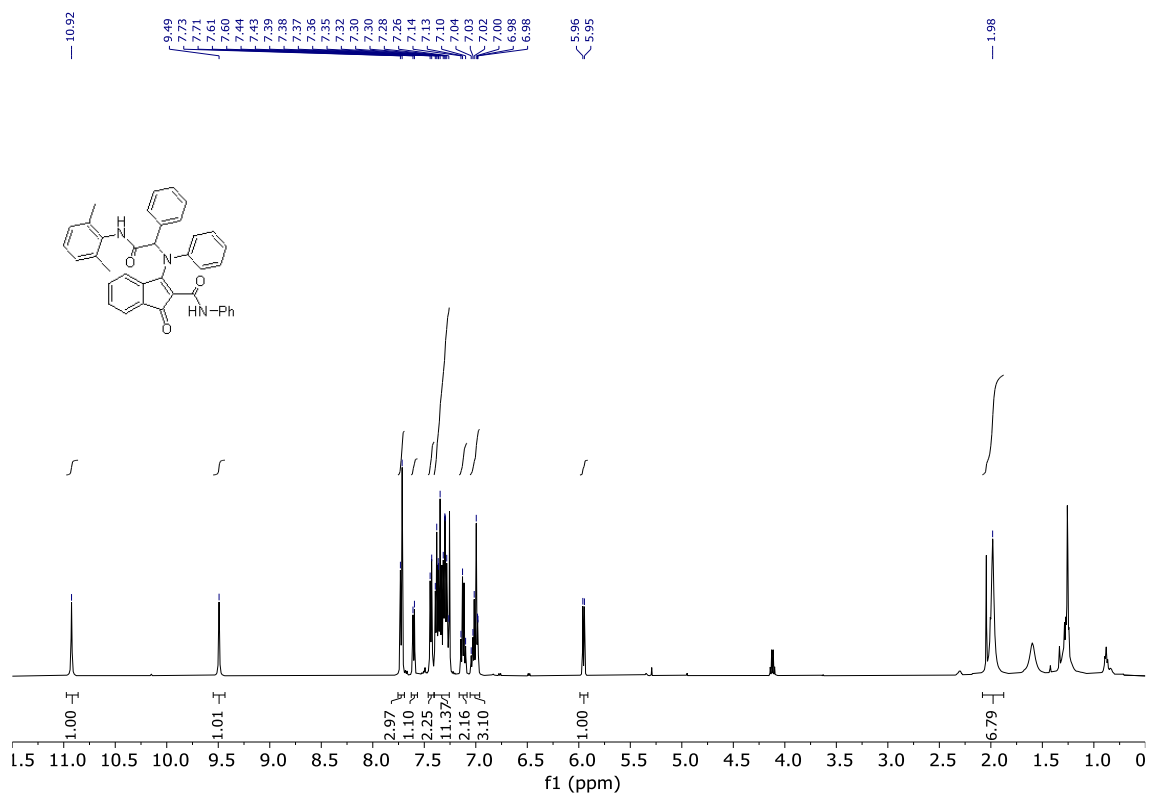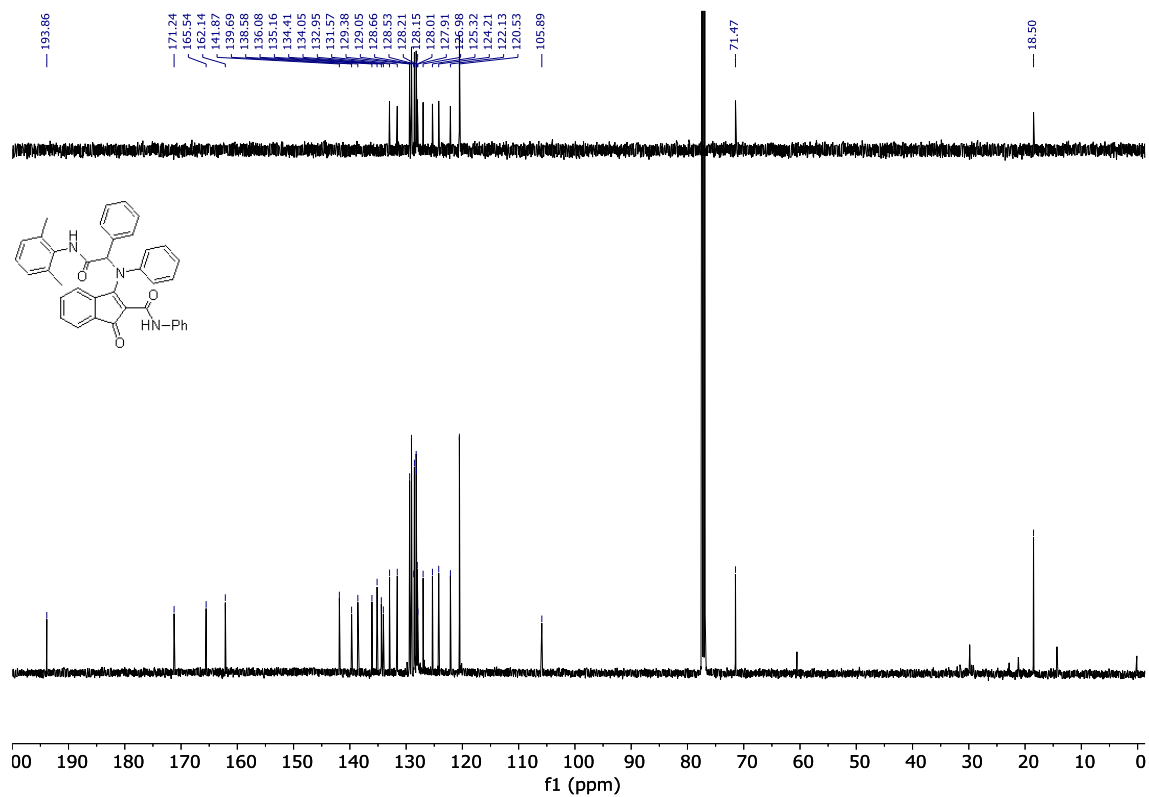

### 3-((4-Chlorophenyl)(2-(cyclohexylamino)-2-oxo-1-phenylethyl)amino)-1-oxo-N-phenyl-1H-indene-2-carboxamide (11o)

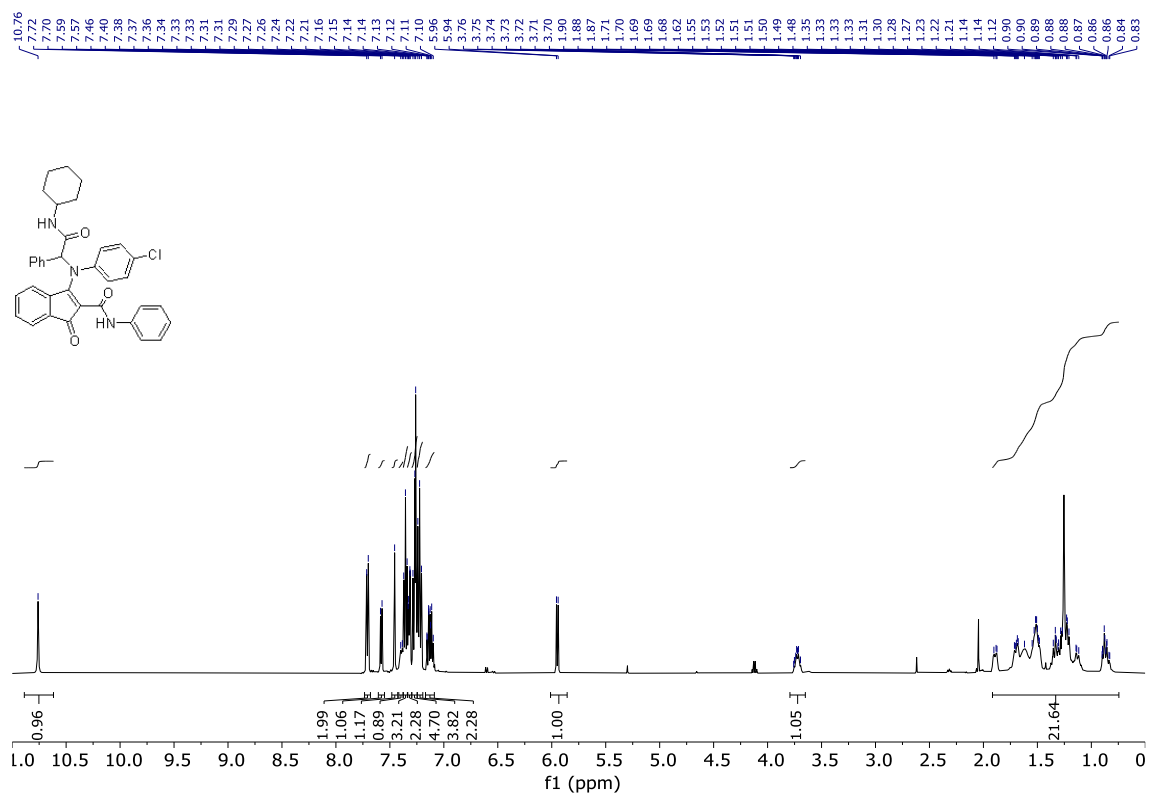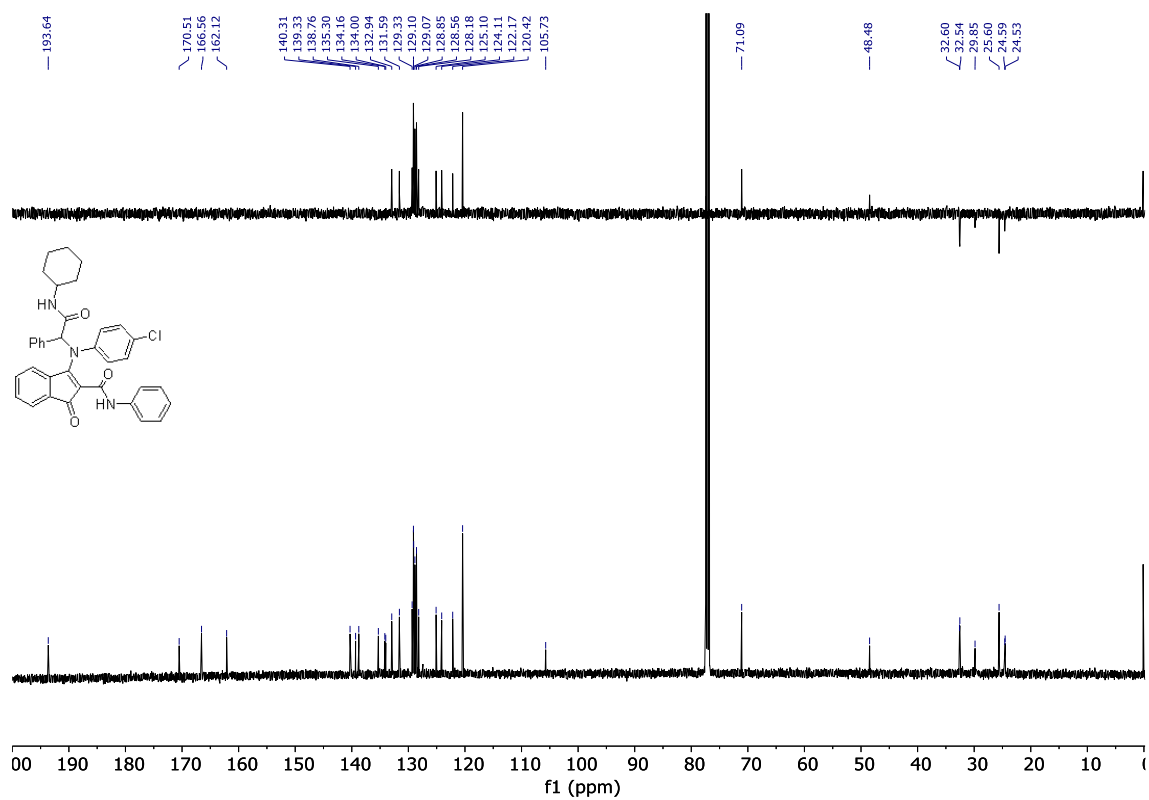

**3-((2-(Cyclohexylamino)-2-oxo-1-phenylethyl)(4-methoxyphenyl)amino)-1-oxo-N-phenyl-1H-indene-2-carboxamide (11p)**

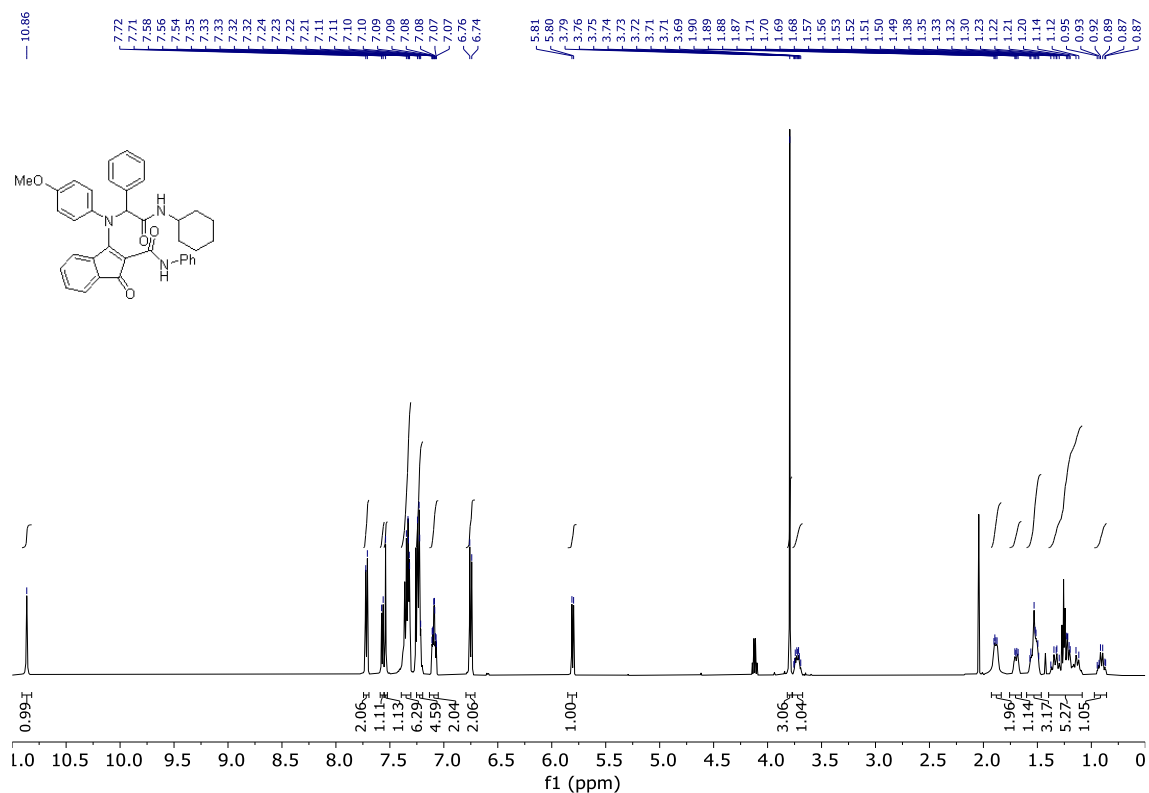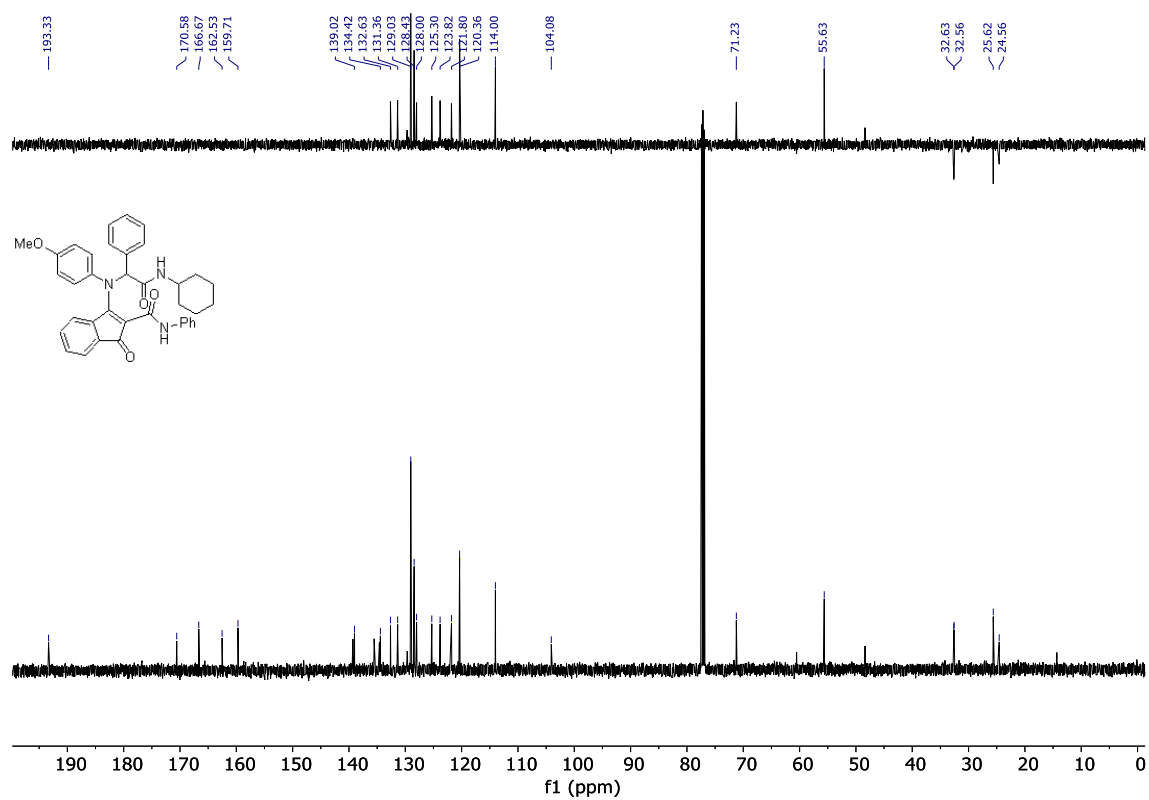

# 1-Benzyl-3-cyclohexyl-3'-hydroxy-4-oxo-N,5-diphenylspiro[imidazolidine-2,1'-indene]-2'-carboxamide (18a)

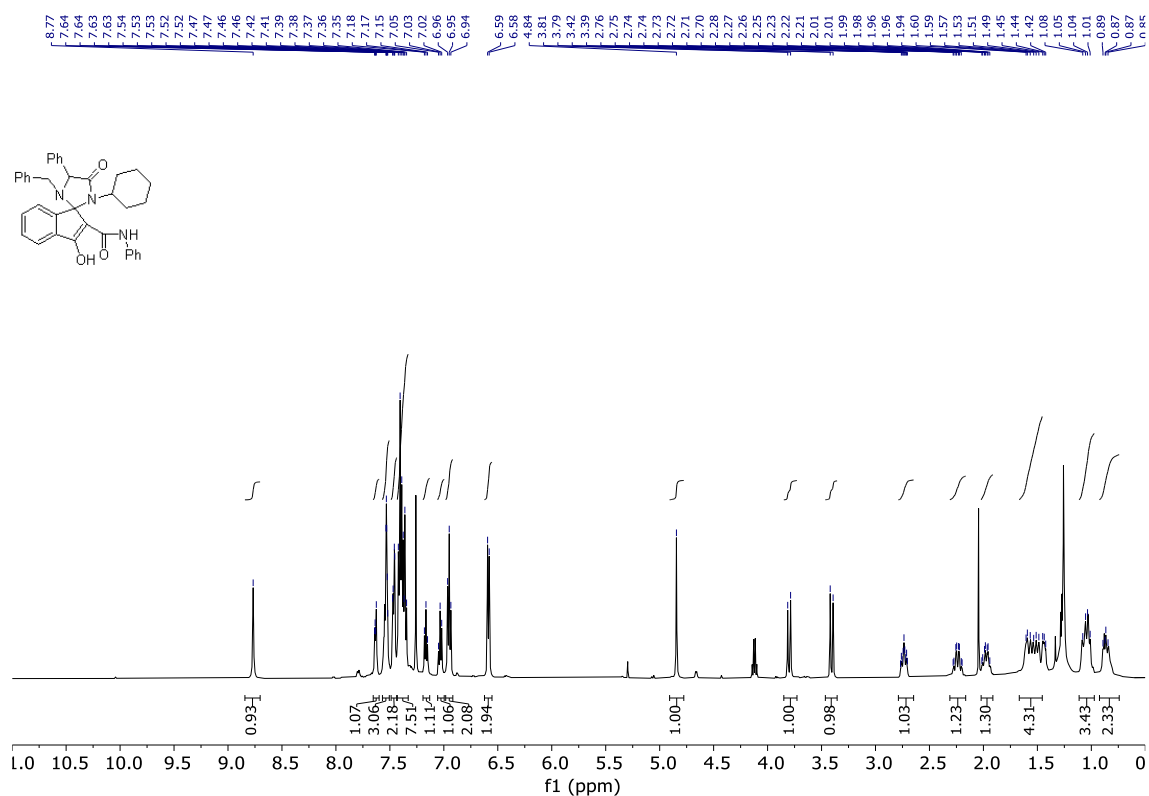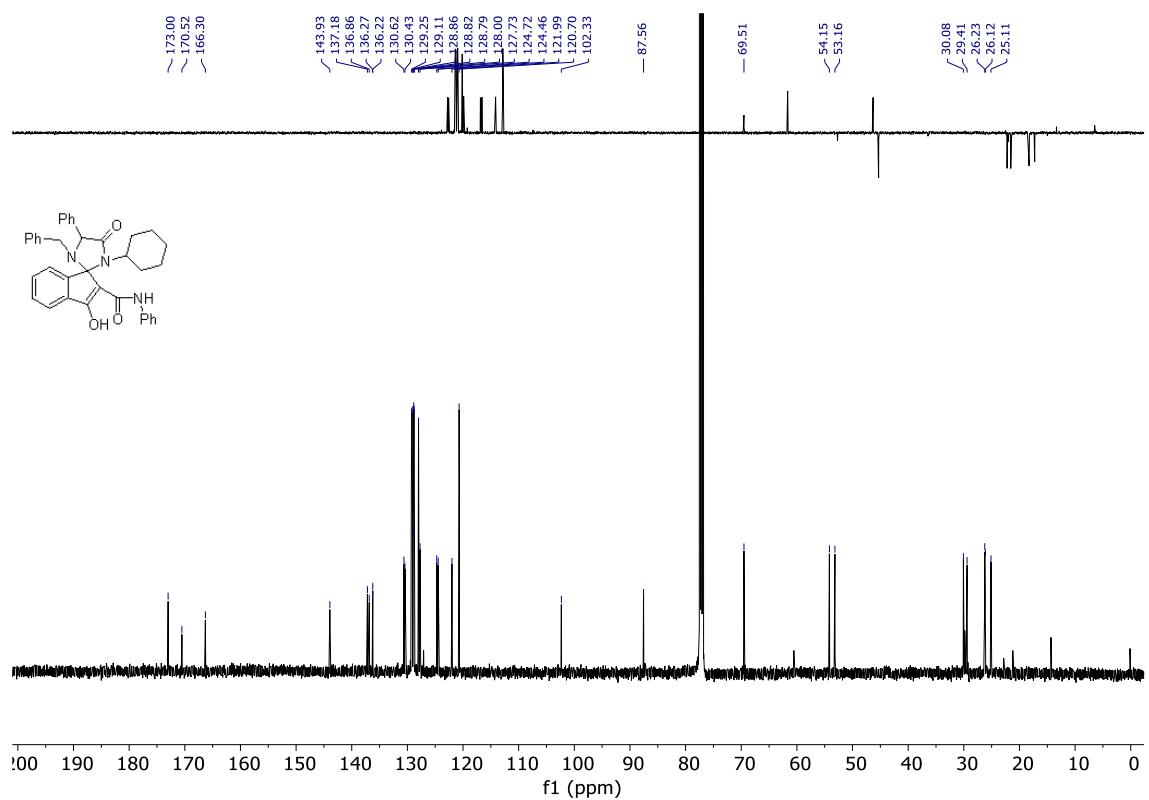



**Ethyl 3-(4-(2-bromophenyl)-1-cyclohexyl-3'-hydroxy-5-oxo-2'-(phenylcarbamoyl)spiro[imidazolidine-2,1'-inden]-3-yl)propanoate (18e)**

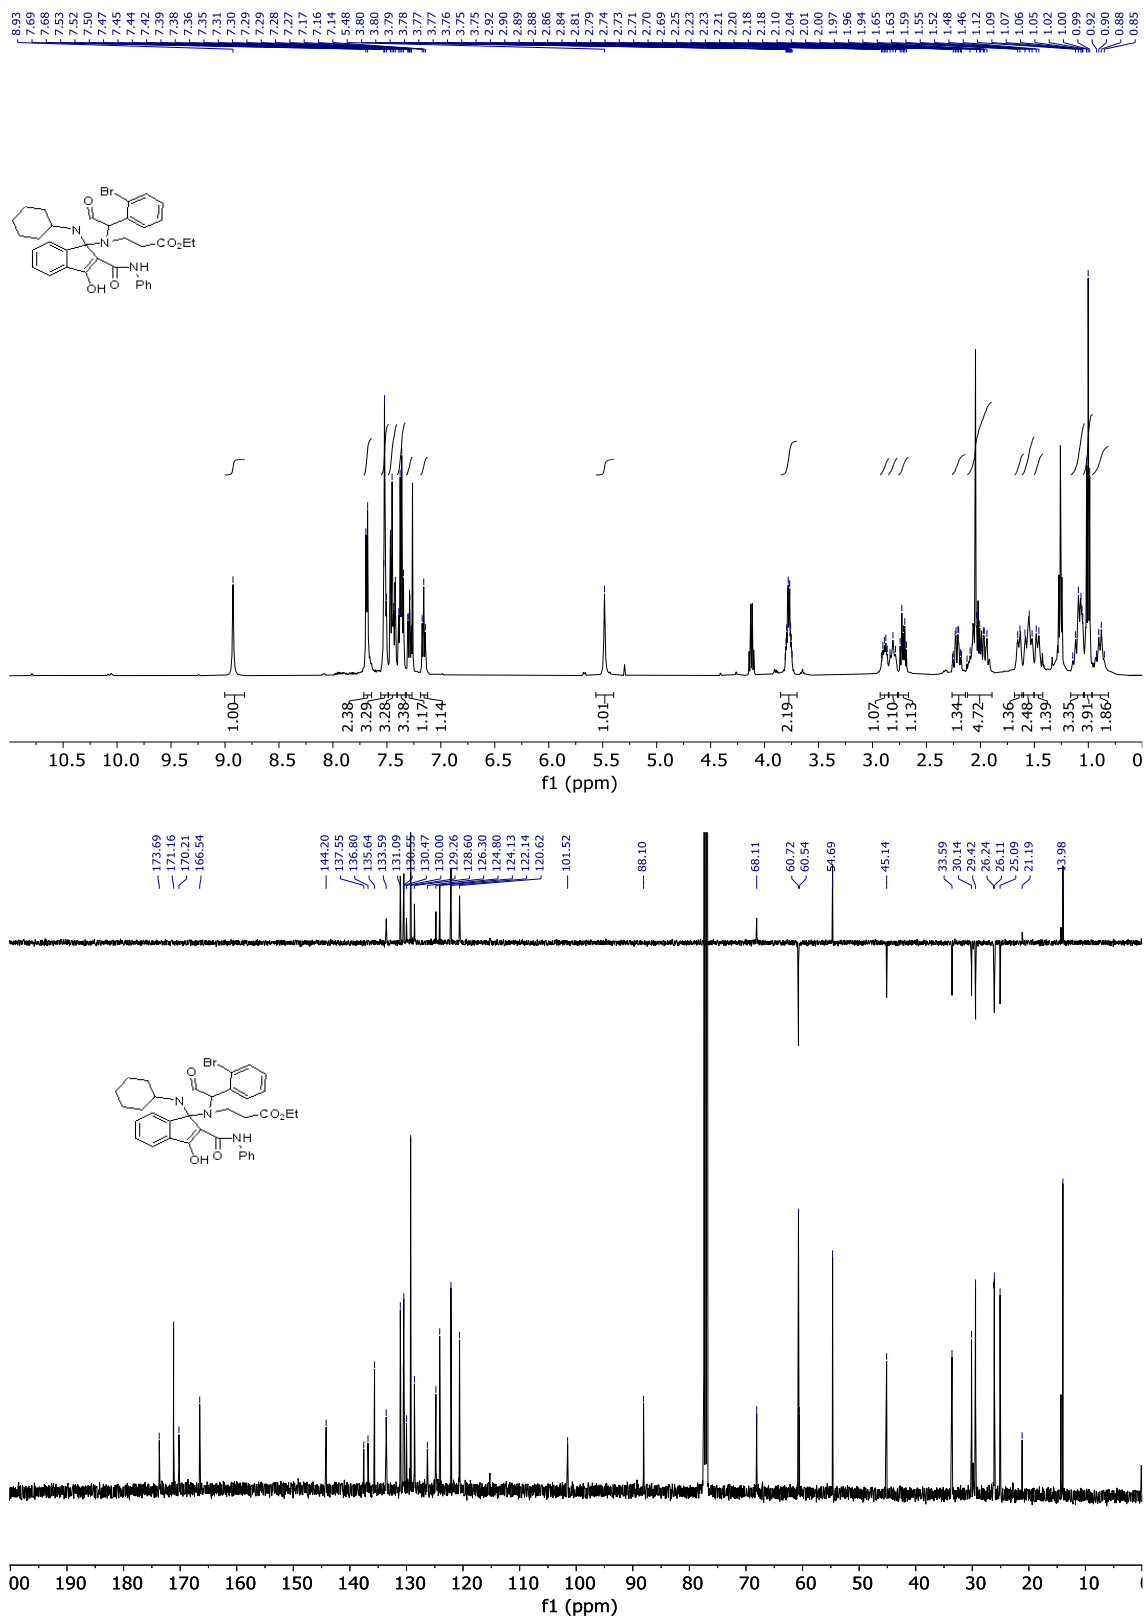

### Compound 11o: COSY and COSY ampliation spectra

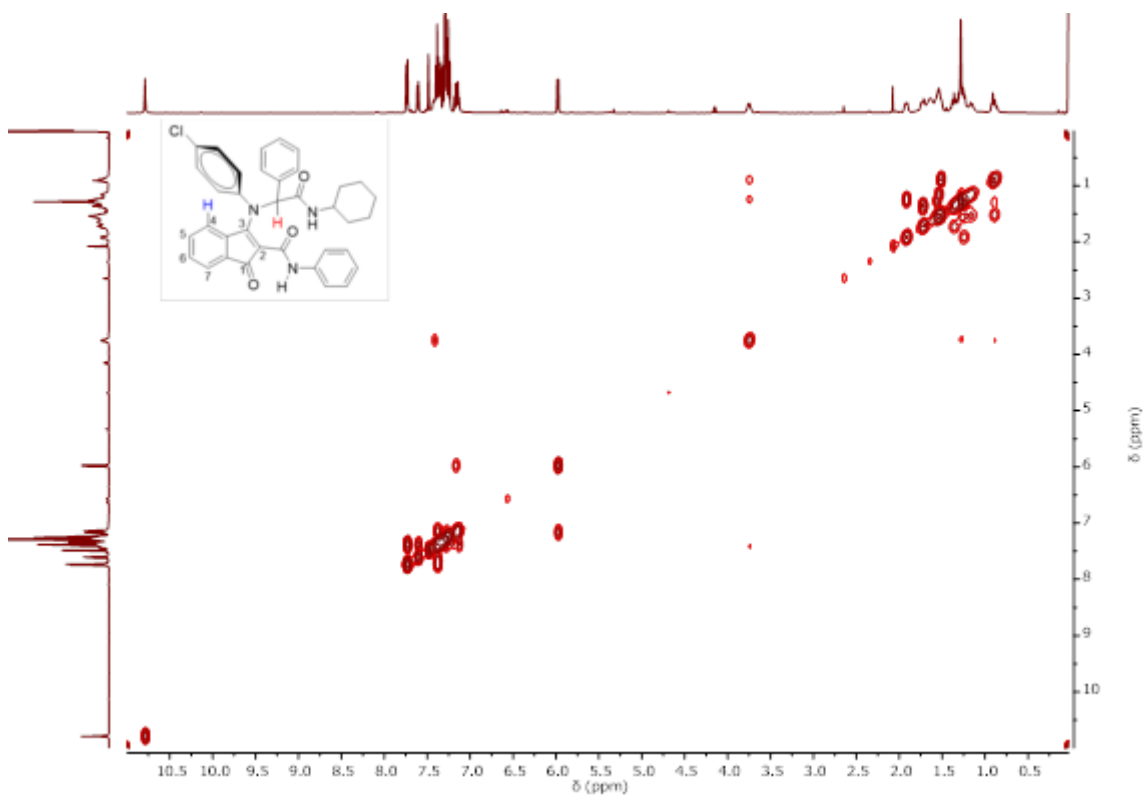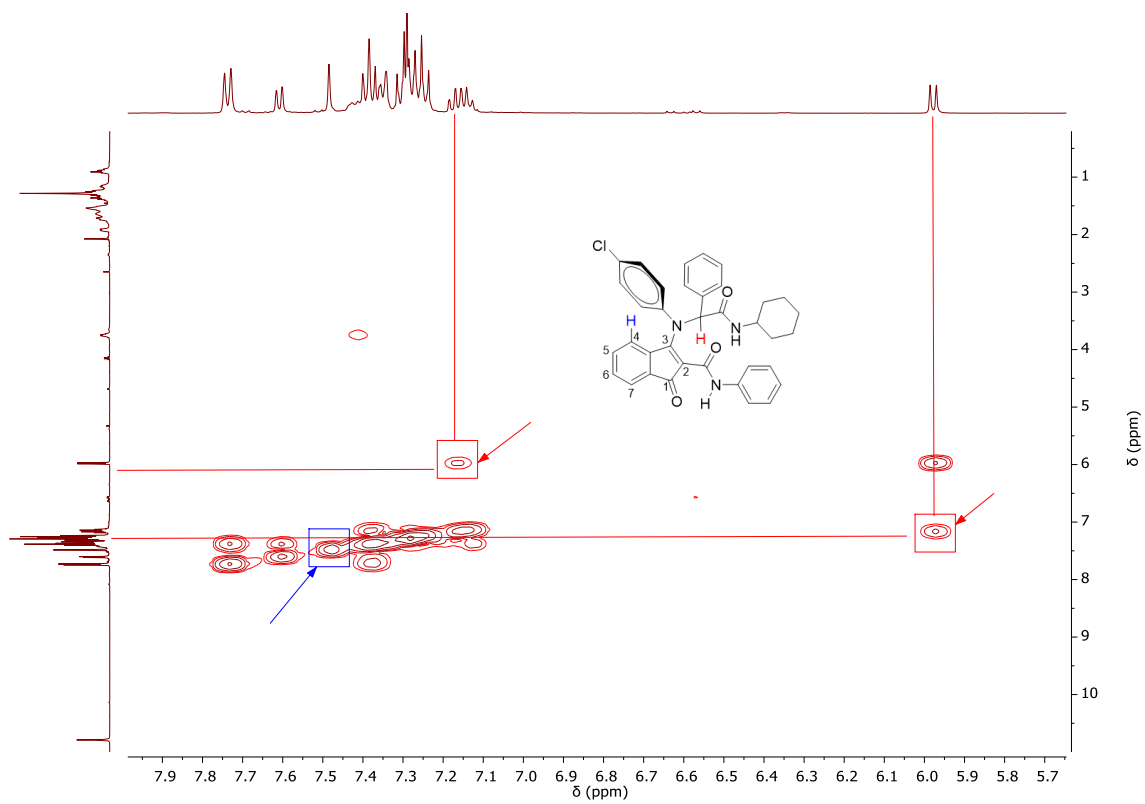

### Compound 11o: HSQC and HSQC amplification spectra

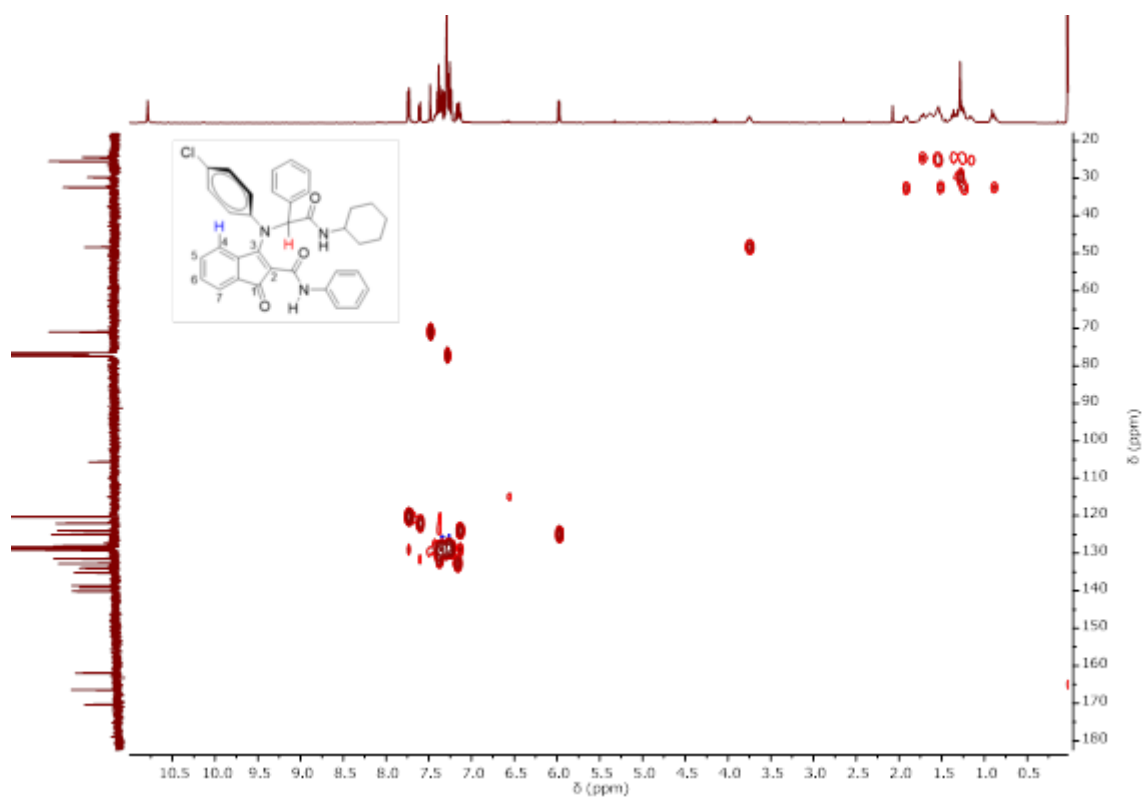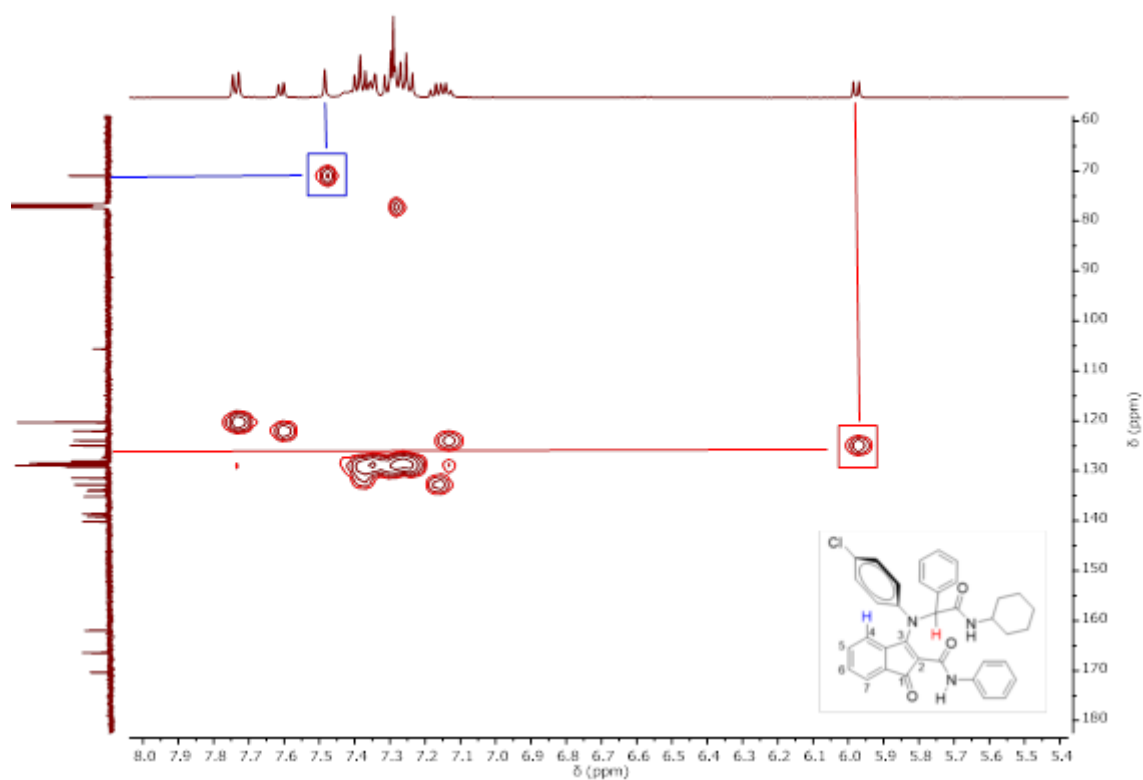

## Compound 18a: ROESY and ROESY ampliation spectra

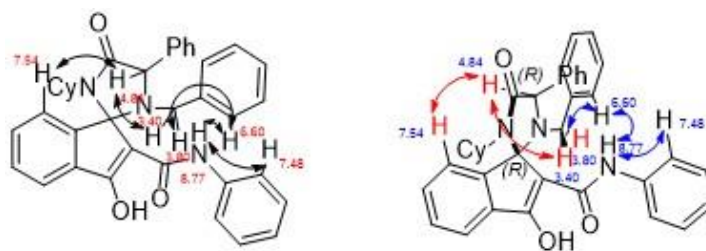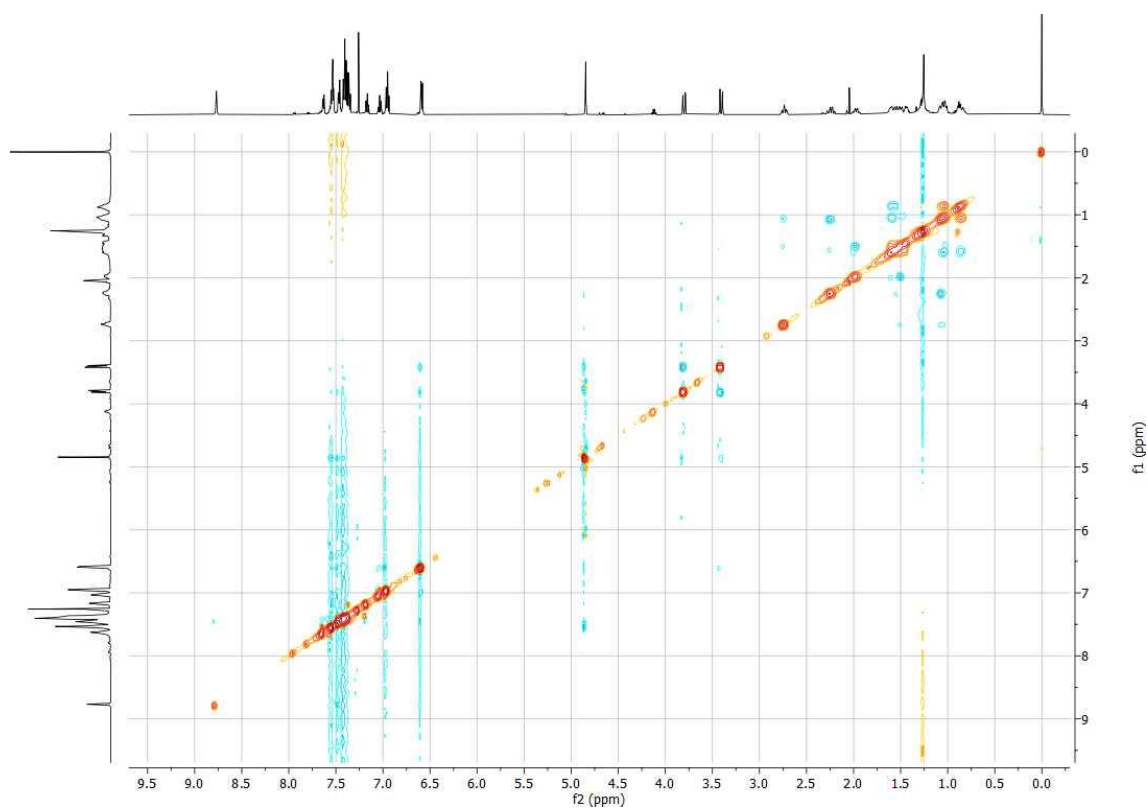

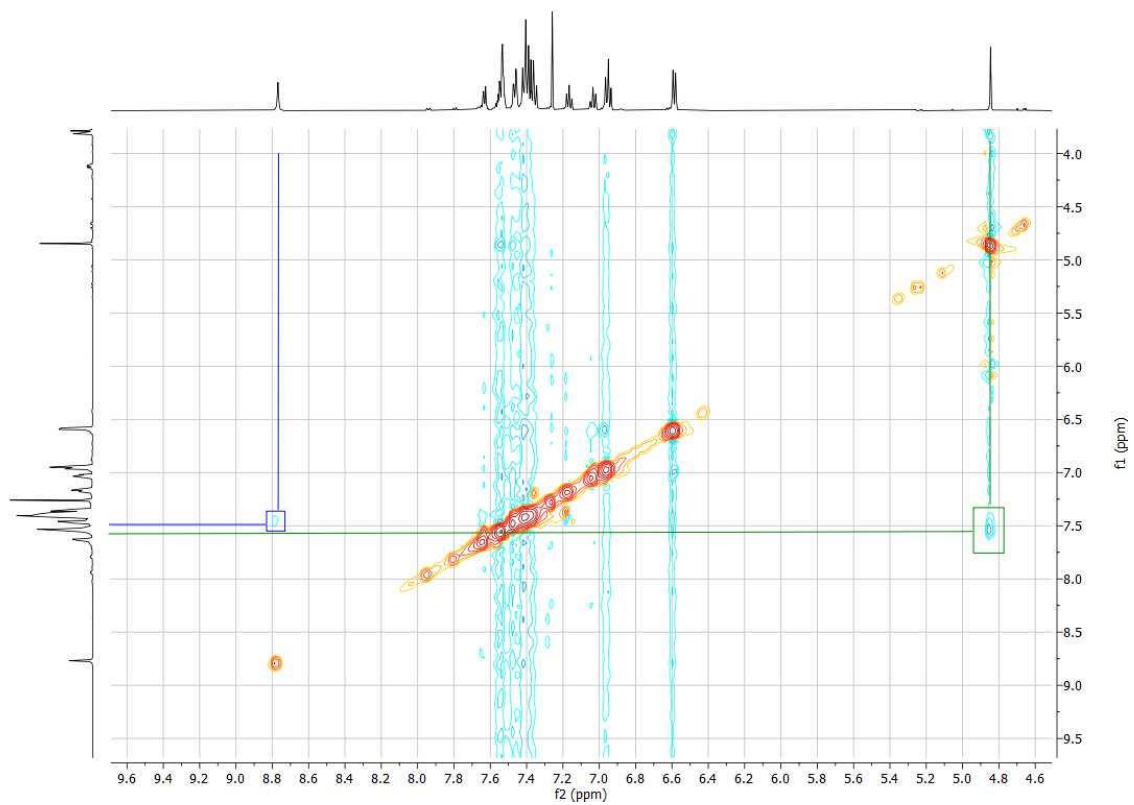

Supplement: d4ob01216j1.pdf [file d4ob01216j1.pdf]
